# Supplementary material
Source: Research Square preprint supplement (doi:10.21203/rs.3.rs-9150066/v1)
Supplement: Supplementary file 1 [file 6578eb3f2ac4411958dddb3f.pdf]

## Statistical analysis plan

|                           |                                                                                                                                                                                                                                                              |
|---------------------------|--------------------------------------------------------------------------------------------------------------------------------------------------------------------------------------------------------------------------------------------------------------|
| <b>Study title</b>        | Optimising kangaroo care to reduce neonatal severe infection/sepsis and resistant bacterial colonisation among high-risk infants in neonatal intensive care: a pragmatic, multicentre, parallel cluster randomised hybrid implementation-effectiveness study |
| <b>Study acronym</b>      | NeoDeco                                                                                                                                                                                                                                                      |
| <b>Study registration</b> | NCT number: NCT05993442                                                                                                                                                                                                                                      |
| <b>Funder</b>             | European Union's Horizon 2020 research and innovation programme                                                                                                                                                                                              |
| <b>Sponsor</b>            | Fondazione Penta ETS (Penta)                                                                                                                                                                                                                                 |

**SAP version:** 2.0  
**SAP version date:** 23-Feb-2026  
**Based on study protocol version:** 4.0 (23-Dec-2024)

### Authorised by:

**Name:** Dr. Julia Bielicki [MD, MPH, PhD]

**Role:** Chief Investigator

**Name:** Dr. Elske Sieswerda [MD, PhD]

**Role:** Senior scientific co-ordinator

**Name:** Laura Mangiarini

**Role:** Sponsor Representative

**Name:** Dr. C. Henri van Werkhoven [MD, PhD]

**Role:** Statistician

### STATEMENT OF CONFIDENTIALITY

Information in this plan and accompanying documents contains confidential information that is the property of Penta Foundation. It is understood that the information will not be used, divulged, or published without prior written consent of Penta Foundation, except to the extent such disclosure is required by applicable laws and regulations.

### SAP REVISION HISTORY

| Date        | Version | Rationale                                                                                               | Author                                               |
|-------------|---------|---------------------------------------------------------------------------------------------------------|------------------------------------------------------|
| 24-Mar-2025 | 1.0     | First approved version                                                                                  | Elske Sieswerda, Henri van Werkhoven                 |
| xx-Jan-2026 | 2.0     | Added secondary analysis of primary endpoint neonatal severe infection/sepsis and corrected some errors | Elske Sieswerda, Henri van Werkhoven, Julia Bielicki |

---

**SAP SIGNATURE PAGE**

**Sponsor:**  
Signature

Firmato da:  
*Laura Mangiarini*  
Nome firmatario: Laura Mangiarini  
Motivo per la firma: Approvo il documento  
Ora firma: 02 marzo 2026 | 12:55 CET  
0F5FD31B122640C7A5AB4A3E74F51EAC

---

02 marzo 2026 | 12:55 CET

Date of Signature  
(dd/mmm/yyyy)

Name: Laura Mangiarini  
Title: Chief Program Officer  
Institution: Fondazione Penta ETS (Penta)  
Address: Corso Stati Uniti 4, 35127 Padova, Italy

**Chief Investigator:**  
Signature

Signed by:  
*Julia Bielicki*  
Signer Name: Julia Bielicki  
Signing Reason: I approve this document  
Signing Time: 02 March 2026 | 08:20 CET  
308F8D3D504749F1BFE41F84942F18D5

---

02 March 2026 | 08:20 CET

Date of Signature  
(dd/mmm/yyyy)

Name: Julia Bielicki [MD, MPH, PhD]  
Title: Reader in Paediatric Infectious Diseases St George's,  
Institution: St George's, University of London  
Address: Cranmer Terrace, SW17 ORE, London, United Kingdom

**Statistician:**  
Signature

Ondertekend door:  
  
Naam ondertekenaar: Henri van Werkhoven  
Reden voor ondertekening: Ik keur dit document goed  
Ondertekentijd: 25 februari 2026 | 13:28 CET  
4D41E14BB64C5DA736E0E52F6A4DF1

25 februari 2026 | 13:29 CET

Date of Signature  
(dd/mmm/yyyy)

Name Henri van Werkhoven [MD, PhD]  
Title Assistant professor in Clinical Epidemiology  
Institution Julius Center for Health Sciences and Primary Care  
Address University Medical Center Utrecht, P.O. Box 85500

**Senior Scientific Coordinator:**

Signature

Ondertekend door:  
  
Naam ondertekenaar: Elske Sieswerda  
Reden voor ondertekening: Ik heb dit document gecontroleerd  
Ondertekentijd: 02 maart 2026 | 09:16 CET  
ED1706E684E84E39AADCDC19F33E0F08

02 maart 2026 | 09:16 CET

Date of Signature  
(dd/mmm/yyyy)

Name Elske Sieswerda [MD, PhD]  
Title Clinical microbiologist and epidemiologist  
Institution Julius Center for Health Sciences and Primary Care  
Address University Medical Center Utrecht, P.O. Box 85500

---

## TABLE OF CONTENTS

|       |                                                               |    |
|-------|---------------------------------------------------------------|----|
| 1     | ABBREVIATIONS AND STUDY DEFINITIONS .....                     | 7  |
| 1.1   | Abbreviations.....                                            | 7  |
| 2     | INTRODUCTION .....                                            | 8  |
| 3     | STUDY METHODS .....                                           | 8  |
| 3.1   | STUDY DESIGN .....                                            | 8  |
| 3.2   | DATA COLLECTION.....                                          | 9  |
| 3.3   | BASELINE ASSESSMENT .....                                     | 10 |
| 3.4   | RANDOMISATION .....                                           | 10 |
| 3.5   | SAMPLE SIZE CALCULATION.....                                  | 11 |
| 3.6   | FRAMEWORK.....                                                | 11 |
| 3.7   | INTERIM ANALYSES.....                                         | 11 |
| 3.8   | TIMING OF FINAL ANALYSES.....                                 | 12 |
| 3.9   | TIMING OF OUTCOME ASSESSMENTS .....                           | 12 |
| 3.10  | STATISTICAL SOFTWARE .....                                    | 12 |
| 3.11  | REPORTING .....                                               | 12 |
| 4     | STATISTICAL PRINCIPLES.....                                   | 12 |
| 4.1   | LEVELS OF STATISTICAL SIGNIFICANCE.....                       | 12 |
| 4.2   | ANALYSIS POPULATIONS .....                                    | 12 |
| 4.3   | ADHERENCE AND PROTOCOL DEVIATIONS.....                        | 13 |
| 5     | STUDY POPULATION .....                                        | 13 |
| 5.1   | CLUSTER AND INFANT FLOW .....                                 | 14 |
| 5.2   | BASELINE CHARACTERISTICS.....                                 | 15 |
| 5.2.1 | Cluster-level characteristics during the baseline period..... | 15 |
| 5.2.2 | Baseline characteristics during the intervention period.....  | 15 |
| 6     | ANALYSIS 15                                                   |    |
| 6.1   | OUTCOME DEFINITIONS AND DETAILS .....                         | 15 |
| 6.1.1 | Primary outcome .....                                         | 15 |
| 6.1.2 | Secondary outcomes.....                                       | 16 |
| 6.1.3 | Exploratory outcomes.....                                     | 17 |
| 6.2   | ANALYSIS METHODS.....                                         | 18 |
| 6.2.1 | Descriptive analyses.....                                     | 18 |
| 6.2.2 | General approach .....                                        | 19 |
| 6.2.3 | Analysis details for primary and secondary outcomes .....     | 20 |
| 6.2.4 | Exploratory outcomes.....                                     | 21 |
| 6.3   | MISSING DATA .....                                            | 22 |
| 6.4   | SAFETY.....                                                   | 22 |

---

|     |                          |    |
|-----|--------------------------|----|
| 6.5 | INTERIM ANALYSES.....    | 22 |
| 7   | REFERENCES .....         | 22 |
| 8   | Supplement24             |    |
| 8.1 | Supplement Table 1 ..... | 24 |
| 8.2 | Supplement Table 2 ..... | 25 |

## 1 ABBREVIATIONS AND STUDY DEFINITIONS

### 1.1 ABBREVIATIONS

| ABBREVIATION | EXPANSION                             |
|--------------|---------------------------------------|
| BPD          | Bronchopulmonary Dysplasia            |
| CPN          | Clinical Practice Network             |
| CSF          | Cerebrospinal Fluid                   |
| DAI          | Device-associated Infection           |
| DSMB         | Data Safety Monitoring Board          |
| IVH          | Intraventricular Haemorrhage          |
| IDMC         | Independent Data Monitoring Committee |
| IPC          | Infection, Prevention and Control     |
| KC           | Kangaroo Care                         |
| LOCF         | Last observation carried forward      |
| NEC          | Necrotizing Enterocolitis             |
| NICU         | Neonatal Intensive Care Unit          |
| PCR          | Polymerase Chain Reaction             |
| PPS          | Point Prevalence Survey               |
| PVL          | Periventricular leukomalacia          |
| ROP          | Retinopathy of prematurity            |
| SAP          | Statistical Analysis Plan             |
| StSC         | Skin-to-Skin Contact                  |
| SSI          | Surgical Site Infection               |
| VAP          | Ventilator-associated pneumonia       |

## 2 INTRODUCTION

The purpose of this statistical analysis plan (SAP) is to describe the planned statistical analyses to address effectiveness objectives and quantitative implementation objectives within the **NeoDeco** study “**Optimising kangaroo care to reduce neonatal severe infection/sepsis and resistant bacterial colonisation among high-risk infants in neonatal intensive care: a pragmatic, multicentre, parallel cluster randomised hybrid implementation-effectiveness study**”.

The SAP should be reviewed at least annually, or as and when changes to the planned statistical analyses occur. When an updated version is created, it must be reviewed and approved by those listed on the cover page, and a reason for revision must be listed in the revision history table.

### Related documents

- NeoDeco study protocol version 4.0 (23-Dec-2024)
- NeoIPC surveillance manual version 1.2 (01 – Aug – 2023)
- NeoDeco Data Management Plan version 1.0 (01-Aug-2024)
- NeoDeco codebook version 2.0 (13-Mar- 2025)
- Restricted Randomization plan version 2.0 (27-Jan-2025)

## 3 STUDY METHODS

### 3.1 STUDY DESIGN

NeoDeco is a pragmatic, multicentre, international, parallel group, cluster randomised hybrid effectiveness-implementation study with baseline assessment, wash-in period and staggered randomisation. The study focuses on investigating the effectiveness (i.e. superiority) of implementing optimised kangaroo care (KC) for infection prevention and control outcomes (IPC), with standard delivery of KC without specific implementation support or strategies as the comparator of interest. KC, including regular skin-to-skin contact (StSC), is already part of standard care in all participating units. However, implementation is known to be suboptimal in the absence of specific implementation support. Neonatal units participating in NeoDeco will be randomised to receive implementation support during the study (intervention arm) or after the study completion (standard care arm). For a more extensive summary of the study design, see protocol synopsis. The study schema is illustrated in Figure 1.

Due to the nature of the intervention and the study design, blinding of parents or guardians, care providers and on-site research staff to the treatment allocation is not possible. Technicians performing PCRs and investigators performing the final analyses will be blinded to the allocated intervention.

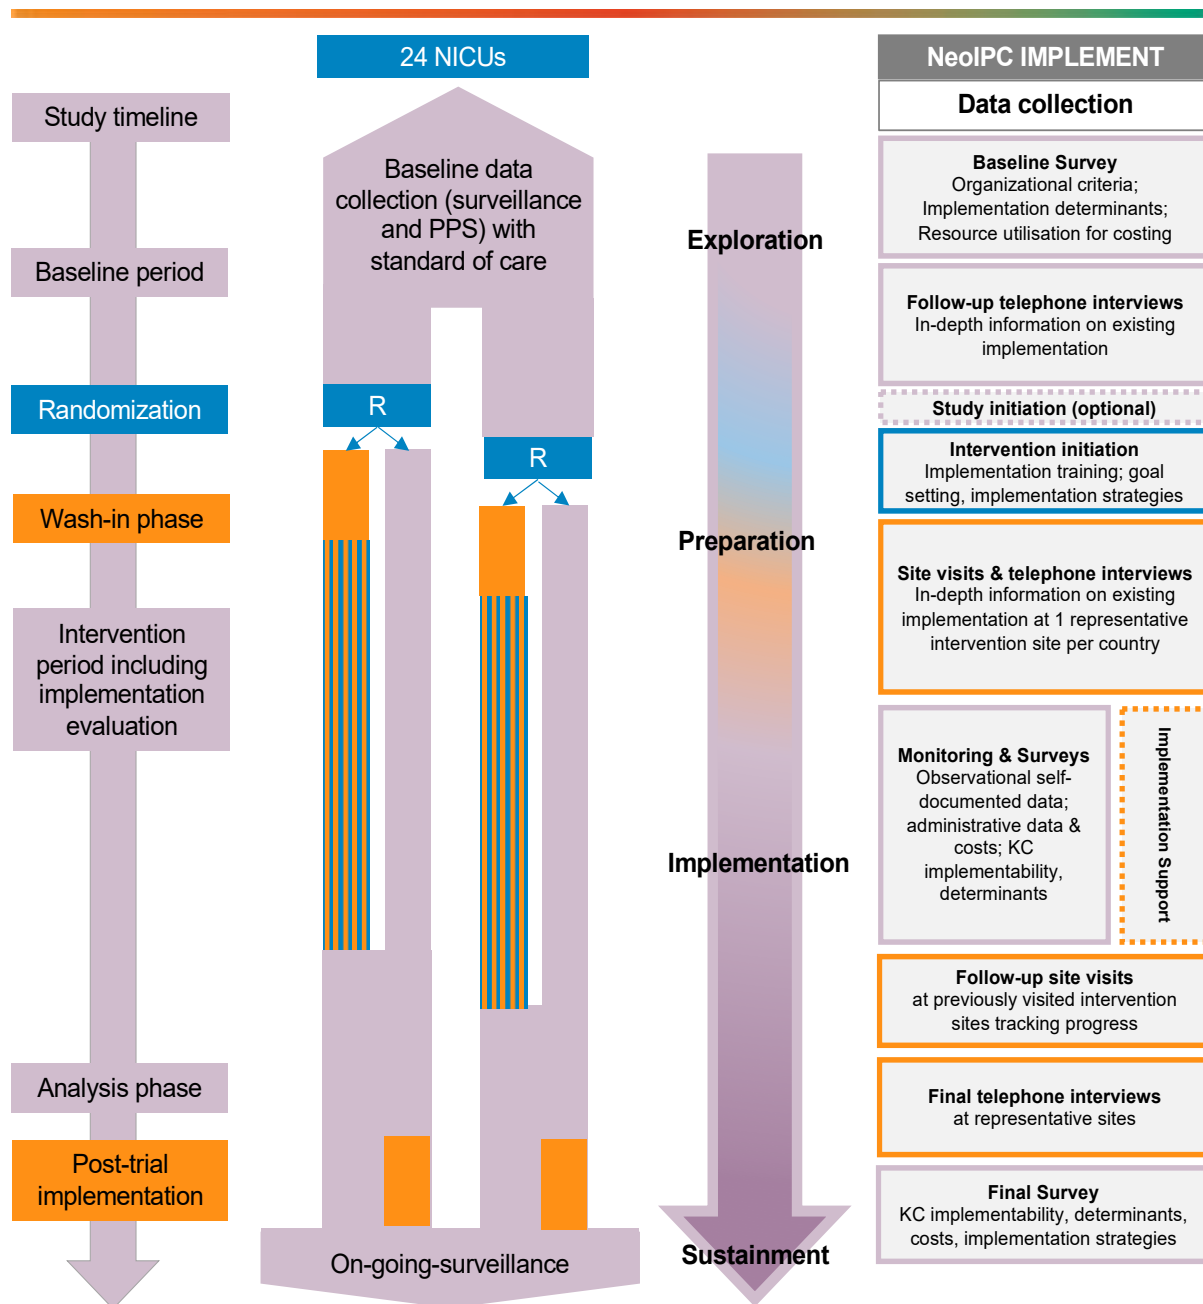

Note: At each randomisation (R), a minimum of 10 NICUs are randomly allocated to the intervention (optimised KC) arm or the standard of care arm in a 1:1 manner. NICUs allocated to the control SOC arm will be given the opportunity for implementation of optimised KC in the post-trial period.

Figure 1: Graphic display of the proposed cluster randomised study design with staggered randomisation with two staggers.

### 3.2 DATA COLLECTION

NeoDeco has three data collection instruments: (1) NeoIPC Surveillance; (2) Point Prevalence Surveys (PPS), and (3) unit-level data collection.

NeoIPC Surveillance longitudinally collects data on hospital-acquired infections in high-risk infants in participating units. For most analyses using NeoIPC Surveillance data, only data from enrolled infants with informed consent are used. For the secondary analysis of the primary endpoint neonatal severe

infection/sepsis, cluster-aggregated data from NeoIPC Surveillance including all high-risk infants will be used (surveillance-based neonatal severe infection/sepsis).

PPS include weekly cross-sectional clinical data collection of enrolled infants and weekly (baseline period) or four-weekly (post-baseline period) stool sample collection to define resistant bacterial colonisation.

Unit-level data collection includes IPC and care practices at the unit and the total numbers of infant admissions according to risk status and the number of high-risk infants with major non-infection neonatal morbidity at the unit during study periods.

## 4

Supplement Table 1 summarizes which endpoint is collected through which data collection tool. Data collection ends at discharge, transferal to another non-participating ward or another hospital, death, or withdrawal of consent.

### 4.1 BASELINE ASSESSMENT

To improve balance in important cluster characteristics between the study arms and increase power of the study, we will collect data during a baseline period preceding randomisation. Cluster-level data from the baseline period will be used for our randomisation procedure (chapter 3.4), sample size calculation (chapter 3.5) and statistical analyses of the study (chapter 6). Sample size calculations are based on a fixed baseline period duration of 3 months for all sites. In practice sites within one stagger may start their baseline period at different dates. For pragmatic reasons, a minimum baseline period of two months will be accepted.

### 4.2 RANDOMISATION

The unit of randomisation and implementation of the intervention is the neonatal unit (cluster). Each cluster will consist of one neonatal unit. We will perform cluster randomisation in two staggers according to a computer algorithm. The size and groupings of the staggers will be based on pragmatic reasons. In the third month of baseline data collection, the first stagger of neonatal units will be randomised 1:1 to the intervention or control arm. A subsequent stagger of neonatal units will be randomised using the same approach conditional on at least three months of baseline surveillance data collection and 1 month colonisation data. The minimum defined number of clusters per stagger is ten.

We will use restricted randomisation to reduce the risk of imbalance between the intervention and control neonatal units in cluster-level characteristics from the baseline period that are associated with the co-primary outcomes (baseline cluster-level neonatal severe infection/sepsis risk, cluster-level resistant colonisation pressure during the baseline period or in the colonisation assessment phase and baseline level of skin-to-skin care (StSC) use at the cluster level). In addition, to facilitate implementation evaluation and cost evaluation in each country, we will restrict randomisation options such that each country (Greece, Italy, Spain, Switzerland, United Kingdom) includes at least one intervention and one control neonatal unit.

Per stagger, an independent statistician will randomly select a randomisation sequence from all potential sequences that allow for balance between study arms in these key baseline cluster-level

characteristics while maintaining sufficient unpredictability and randomness. For technical details on the restricted randomisation procedure, we refer to the separate document on this topic.

### **4.3 SAMPLE SIZE CALCULATION**

For the sample size calculation, we used the Stata command `clustersampsi`.<sup>1</sup> This command allows to incorporate clustering, a correlation between the cluster-level primary outcome in the baseline and intervention period, and variation in cluster size to calculate the sample size needed for a cluster randomized trial with baseline assessment.

Up to 24 neonatal units will be included and will contribute 2-3 months of data for the baseline period and up to 10 months for the intervention period. The estimated sample size for the intervention period is based on the primary outcome, i.e. the proportion of high-risk infants with at least one episode of neonatal severe infection/sepsis, from 72 hours after birth until neonatal unit discharge. This outcome has previously been used in large-scale neonatal infection prevention trials, allowing sound assumptions to be made to inform sample size calculation.<sup>2</sup>

In this study, 12 clusters (i.e., neonatal units) will be randomly allocated to the optimised KC intervention while 12 clusters are allocated to the standard care arm after a baseline period for 2-3 months. The intervention period will be up to 10 months after a wash-in period of 2 months, with data collection of up to 13 months in total (including the baseline period, excluding the wash-in period) and a planned total study duration of up to 15 months.

Conservatively assuming an average intervention period of 9 months, an average of 66 high-risk infant inclusions per cluster in the intervention period, a correlation of 0.60 between cluster-level neonatal severe infection/sepsis risk at baseline and intervention period, and an intra-cluster correlation coefficient of 0.01, we have 82% power to detect a 7.5% absolute reduction in neonatal severe infection/sepsis from 30% (without optimised KC) to 22.5% (with optimised KC), corresponding to a 25% relative reduction. For this calculation we assumed negligible loss to follow-up, a coefficient of variation for cluster size of 0.75, and a two-sided  $\alpha=0.050$ . ICC was based on providing a reasonable range of expected cumulative incidences of neonatal severe infection/sepsis across clusters. We assumed an autocorrelation for the cluster-level cumulative incidence between baseline and intervention period of 0.6 as reasonable for a moderately stable outcome such as neonatal sepsis and with baseline and intervention data collected within 15 months.<sup>3</sup>

In total, 3080 high-risk infants are expected to be included at the participating units during baseline and intervention period (excluding wash-in period), with an estimated total of 1980 high-risk infants contributing data to the intervention period (excluding baseline and wash-in period).

### **4.4 FRAMEWORK**

We will conduct all statistical analyses using a superiority hypothesis testing framework, thereby assessing whether successful implementation of early, repeated, and sustained StSC improves selected outcomes in high-risk infants as compared to standard care.

### **4.5 INTERIM ANALYSES**

In our study, there are no planned interim analyses.

#### **4.6 TIMING OF FINAL ANALYSES**

Final statistical analyses are timed when data collection of all sites in both staggers is completed, and the database is locked.

#### **4.7 TIMING OF OUTCOME ASSESSMENTS**

Infant-level data from NeoIPC Surveillance is collected prospectively. Infant-level clinical and colonization data from PPS is collected cross-sectionally at weekly and four-weekly intervals (see 3.2). Unit-level data collection is done at the end of baseline and at the end of the study period.

The main analyses will include data collected during baseline and study period. Data collected post-baseline and pre-study period (wash-in period) may be used for exploratory analyses assessing trends in outcome data.

#### **4.8 STATISTICAL SOFTWARE**

Analyses will be performed in R (version 4.4.0 or higher). Used R packages will be listed in the study report.

#### **4.9 REPORTING**

This SAP was written in accordance with published recommendations.<sup>4</sup> Reporting of study conduct and summary of study data will be according to the Consolidated Standards of Reporting Trials (CONSORT) statement reporting guidelines, including the extension to cluster randomised trials.<sup>5,6</sup>

### **5 STATISTICAL PRINCIPLES**

The primary determinant of interest is the allocated intervention (i.e. optimized KC versus standard of care). Intervention clusters and their individual infants will be compared to control clusters and their individual infants.

#### **5.1 LEVELS OF STATISTICAL SIGNIFICANCE**

We will present estimates with 95% confidence intervals (CIs). A two-sided p-value less than 0.05 will be considered evidence of an effect, i.e. the observed association is unlikely to have occurred by chance alone.

#### **5.2 ANALYSIS POPULATIONS**

There are two levels of analysis: the cluster level and the individual infant level. At the cluster level, the analysis population includes all neonatal units that participated in NeoDeco. At the infant level, the analysis population includes all infants whose parents or legal guardians provided written informed consent to data and/or sample collection for NeoDeco. For infant-level analyses, cluster-level summary measures are derived from consented infants only. For analyses of cluster-aggregated outcomes (surveillance-based neonatal severe infection/sepsis and major non-infection neonatal morbidity), summary measures are derived from all high-risk infants (born at gestational age <32 weeks) registered in NeoIPC Surveillance or admitted to participating neonatal units during the study period, regardless of individual consent status.

For most clinical endpoints, we aim to analyse outcomes at the individual level. Cluster-aggregated outcomes (surveillance-based neonatal severe infection/sepsis and major non-infection neonatal morbidity) will be analysed at the cluster-level. For primary and secondary outcomes analysed at the

individual level, we will additionally perform cluster-level analyses as sensitivity analyses, i.e. to check for robustness of the result of the analysis. In case there is no appropriate fit of individual-level models of other endpoints, these cluster-level analyses will replace the main analysis.

Data are analysed according to the relevant study period (baseline period or intervention period) and according to the allocated intervention during the study period, irrespective of StSC receipt (i.e. intention-to-treat principle). Infants already hospitalized at the start of a study period will be included in the study population for endpoints based on repeated events, but excluded for endpoints based on first events, to prevent immortal time bias. For included infants already hospitalized at the start of the baseline period, data from before baseline is completed retrospectively. For included infants already hospitalized at the start of the intervention period, data from before the intervention period is already prospectively collected as part of the wash-in period. Only data collected after the start of a relevant study period will be included in the analyses. As an example, in case an infant is already hospitalized and has a first neonatal severe infection/sepsis episode before the start of the intervention period and a second episode after the start of the intervention period, this infant will be excluded for the assessment of the *cumulative incidence* of neonatal severe infection sepsis risk, because the endpoint only assesses first events and has already been reached prior to the start of the intervention period, i.e. the infant is no longer “at risk”. However, the infant and the second episode will be included for the *incidence rate* of neonatal severe infection/sepsis and assessed based on hospitalization days since start of the intervention period, since this endpoint allows for analysis of repeated events, i.e. the infant stays “at risk” for another event. For PPS-derived endpoints such as resistant bacterial colonization, observations are assigned to the study period in which the PPS was conducted. Cluster-aggregated data such as surveillance-based neonatal severe infection/sepsis and major non-infection neonatal morbidity are assigned to the study period in which the data was collected, regardless of timing of hospitalization of individual infants.

### **5.3 ADHERENCE AND PROTOCOL DEVIATIONS**

StSC receipt is monitored during the study. In addition, the level of implementation is defined per intervention cluster. For individual infants, motivated protocol deviations for application of StSC are allowed, documented, and listed in a final study report. For clusters, deviations of the implementation plan are allowed to fit in with site processes and needs. Such motivated deviations are fully documented.

In the primary analyses, we will analyse outcomes irrespective of the amount of StSC an infant received or the level of optimized KC implementation at the unit (i.e. intention-to-treat principle). We will present summary statistics of individual and cluster-level StSC receipt in both study arms. See secondary endpoints for description of the analysis.

Implementation evaluation, including deviations of the implementation plan at the cluster level, will be assessed by a mixed method approach within an implementation science evaluation framework. These methods are out of the scope of this statistical analysis plan.

## **6 STUDY POPULATION**

For eligibility criteria in NeoDeco, we refer to the NeoDeco study protocol. At the infant level there are no exclusion criteria except for absence of informed consent. Informed consent is obtained separately for data and sample collection.

## 6.1 CLUSTER AND INFANT FLOW

We will summarise the following data on the study cluster and infant flow:

### Neonatal units (clusters)

- Number of clusters
  - Included (i.e. started baseline period)
  - Randomized
  - Withdrawn

### Infants

- Number of infants during baseline period, overall and per cluster
  - Admitted to the neonatal unit during the study period (all infants and high-risk infants [estimated eligible population] based on unit-level data collection)
  - Enrolled (i.e. informed consent in place)
    - Of which admitted to the neonatal unit before the start of the baseline period
    - Of which still admitted to the neonatal unit at the end of the baseline period
- Number of infants during intervention period, overall, in the intervention and control arm and per cluster
  - Admitted to the neonatal unit during the study period (based on unit-level data collection)
    - Total number of infants (including non-high risk)
    - Total number of high-risk infants (estimated eligible population)
  - Enrolled high-risk infants
    - Total number of infants
    - Number of enrolled infants admitted to the neonatal unit before the start of the intervention period
    - Number of enrolled infants still admitted to the neonatal unit at the end of the intervention period
  - Contributing to data collection through NeIPC surveillance
    - Total number of high-risk infants registered (regardless of consent status)
    - Total number of enrolled infants (with informed consent)
    - Number of enrolled infants admitted to the neonatal unit before the start of the intervention period
    - Number of enrolled infants still admitted to the neonatal unit at the end of the intervention period
    - Total infant-days after start of the intervention period (enrolled infants only)
  - Contributing to data collection through PPS
    - Number of infants contributing to data collection through at least 1 PPS clinical data collection (including StSC adherence)
    - Number of infants contributing to data collection through at least 1 PPS sample collection (including resistant bacterial colonisation)
    - Withdrawn from PPS clinical data and/or sample collection

We will provide a Consort flow diagram to visualise the flow of clusters and infants as recommended by the Consort 2010 statement: extension to cluster randomised trials.<sup>6</sup>

## 6.2 BASELINE CHARACTERISTICS

We will summarise cluster-level characteristics during the baseline period and baseline cluster-level and infant-level characteristics during the intervention period for the intervention and control arm. We will summarize categorical data using counts and percentages. For continuous data, we will present the mean, standard deviation (SD), and range when the data are normally distributed, and the median, interquartile range (IQR), and range when the data are skewed. We will not perform statistical tests for significance on baseline characteristics but discuss clinical relevance of any observed imbalances. Characteristics that are summarised are:

### 6.2.1 Cluster-level characteristics during the baseline period

- NICU country
- Cluster size
- Neonatal severe infection/sepsis risk
- Prevalence of resistant bacterial colonisation
- Level of StSC
- Minimum expected target duration of StSC (intervention clusters); would-be minimum expected target duration of StSC (control clusters if they would have been allocated to intervention)

### 6.2.2 Baseline characteristics during the intervention period

- NICU
- Sex
- Birthweight
- Gestational age at birth
- Singleton vs multiple
- Mode of delivery
- Born in or outside hospital
- Day of life admitted
- Day of life enrolled in study

## 7 ANALYSIS

### 7.1 OUTCOME DEFINITIONS AND DETAILS

#### 7.1.1 Primary outcome

##### Neonatal severe infection/sepsis

Neonatal severe infection/sepsis includes any of three diagnoses: clinical sepsis, laboratory-confirmed bloodstream infection (LC-BSI) and pneumonia, as registered by sites in NeoIPC Surveillance. Sites will record all episodes of neonatal severe infection/sepsis occurring >72 hours after admission until the end of the study (discharge or death) in high-risk infants. For this primary outcome, only data from infants with informed consent in place are used (see 4.2).

The cumulative incidence of neonatal severe infection/sepsis is the number of infants with a first episode of neonatal severe infection/sepsis (numerator) divided by the total number of infants at risk at a site during a study period (denominator).

### **7.1.2 Secondary outcomes**

#### Resistant bacterial colonisation

Resistant bacterial colonisation involves detection of one or more pre-specified bacterial resistance genes in a stool sample of an infant during a PPS.

Prevalence of resistant bacterial colonisation during a PPS is the number of infants colonized with a pre-specified bacterial resistance gene (numerator) divided by the total number of infants contributing a stool sample to the PPS at a site (denominator).

Additionally, we will assess separate prevalences of resistant colonisation of the three components of the resistant bacterial colonisation outcome:

- Extended-spectrum beta-lactamase
- Carbapenemase
- Vancomycin resistance in enterococci

#### Infection outcomes – cumulative incidence

We will assess the separate cumulative incidences of the three components of the primary outcome and necrotising enterocolitis (NEC):

- Clinical sepsis
- LC-BSI
- Pneumonia
- NEC

#### Infection outcomes – incidence rate:

We will also define incidence rates of:

- Neonatal severe infection/sepsis
- LC-BSI
- Clinical sepsis

Incidence rate is the number of infection episodes (numerator) divided by the total time the infant contributed to a study period (denominator), expressed in infant days. Multiple episodes per infant can be included.

#### Surveillance-based neonatal severe infection/sepsis:

Cumulative incidence of neonatal severe infection/sepsis based on cluster-aggregated NeoIPC Surveillance data. The numerator is the number of high-risk infants with at least one episode of neonatal severe infection/sepsis registered in NeoIPC Surveillance during a study period. The denominator is the total number of high-risk infants registered in NeoIPC Surveillance during the same period.

#### Major non-infection neonatal morbidity

Major non-infection neonatal morbidity includes medically or surgically treated retinopathy of prematurity (ROP), high-grade intraventricular haemorrhage (IVH), cystic periventricular leukomalacia

(PVL) and/or bronchopulmonary dysplasia (BPD) at 36 weeks' post-menstrual age, as collected in the unit-level data collection.

Cumulative incidence of major non-infection neonatal morbidity is the number of high-risk infants with a first diagnosis of any of the major morbidity items (numerator) divided by the total number of high-risk infants admitted at a site during a study period (denominator). It is collected aggregated at the cluster level, separately for the baseline and intervention period, and is therefore a unit-level endpoint.

#### Neonatal unit mortality

Sites will record deaths occurring >72 hours after admission and during neonatal unit stay in infants with informed consent in place.

Neonatal unit mortality is the number of infants that died during neonatal unit stay (numerator) divided by the total number of infants at risk at a site during a study period (denominator).

#### Neonatal unit length of stay

Neonatal unit length of stay is the total number of calendar days an infant was hospitalised on the neonatal unit during the study period, independent of whether these are accrued as part of a primary or re-admission.

#### Antibiotic treatment

Sites will record antibiotic receipt during admission until discharge in infants with informed consent in place through both NeoIPC Surveillance and clinical data collection in PPS.

Days on antibiotic treatment is the total number of calendar days an infant received one or more antibiotics (numerator) divided by the total number of calendar days the infant contributed to a study period (denominator).

#### StSC duration

Sites will record StSC duration in hours and minutes in the preceding 24 hours in all infants with informed consent in place and hospitalized at the day of a weekly PPS.

#### StSC target attainment

The minimum expected target duration of StSC is a site-specific total daily duration of StSC to be provided per infant per day.

The proportion of infants receiving the minimum expected target duration of StSC is the number of infants contributing to a site's PPS that received the local minimum expected target duration of StSC (numerator) divided by the total number of infants contributing to the same PPS (denominator).

### **7.1.3 Exploratory outcomes**

#### Acquisition of resistant colonisation

Acquisition of resistant colonisation is defined as detection of one or more pre-specified bacterial resistance genes while all previous stool samples in the same infant were negative for the same resistance gene(s).

#### Specific infection syndromes

We will assess the separate cumulative incidences of laboratory confirmed bloodstream infection with a relevant multidrug resistant pathogen, surgical site infections (SSI, including superficial, deep or organ-space SSI) and device-associated infection (DAI), as registered by sites in NeoIPC Surveillance.

Relevant multidrug resistant pathogens include 3<sup>rd</sup> generation cephalosporin-resistant Enterobacterales, methicillin-resistant *Staphylococcus aureus*, vancomycin-resistant *Enterococcus faecium*, or carbapenem-resistant Enterobacterales, *Pseudomonas aeruginosa*, or *Acinetobacter baumannii*.

#### Antibiotic use per antibiotic substance group

Days on antibiotic substance group treatment is the total number of calendar days an infant received one or more antibiotics from a substance group (numerator) divided by the total number of calendar days the infant contributed to a study period (denominator).

Classification of antibiotic substance groups will be adopted from the NeoOBS study.<sup>7</sup> In this approach, the backbone antibiotics are classified based on the Essential Medicines List for Children (EMLc) AWaRe classification (Access, Watch, Reserve).<sup>8</sup> As in NeoOBS, the “Watch” category will be subdivided into Low, Medium, and High Watch based on WHO guideline inclusion and resistance potential. Also, we will not classify antibiotics typically used as combination therapy alongside the backbone therapy, e.g. aminoglycosides, glycopeptides, and metronidazole.

#### Breastfeeding or mother’s milk intake

Breastfeeding or mother’s milk intake is defined as exposure to mother’s milk given by any method in the preceding 24 hours in infants contributing to PPS. The proportion of infants receiving breastfeeding or mother’s milk is the number of infants that received any breastfeeding or mother’s milk intake (numerator) divided by the total number of infants contributing to a PPS at a site (denominator).

#### Human milk intake

Sites will record human milk intake >72 hours after admission until discharge in infants with informed consent in place through NeoIPC Surveillance. A human milk day is a day on which the patient’s enteral feeding exclusively consists of (own mother’s or donor) breast milk, including fortified breast milk.

Human milk intake is the total number of human milk days (numerator) divided by the total days the infant contributed to a study period (denominator).

## **7.2 ANALYSIS METHODS**

### **7.2.1 Descriptive analyses**

#### Endpoints

Cluster-level and intervention group-level primary and secondary endpoints will be visualized as a function of time, including baseline, wash-in, and intervention period, separately for the intervention and control arm.

We will describe all study endpoints with appropriate summary statistics in the intervention versus control arm during the intervention period. Endpoints are summarized at the cluster level, infant level, or both, as appropriate. This includes a summary of StSC receipt at the individual and cluster level and

the proportion of infants receiving the minimum expected target duration of StSC in intervention clusters; For the control clusters we will describe their would-be minimum expected target duration of StSC if they would have been allocated to intervention.

To describe the clustering structure, we will estimate the intra-cluster correlation (ICC) based on the observed study data of the primary outcome of neonatal severe infection/sepsis in all clusters during the baseline period and in control clusters during the intervention period. We will also report the ICCs for secondary endpoints. ICCs will be estimated with the ICCbin package using the analysis of variance estimate.<sup>9,10</sup> We will report on the correlation coefficient of neonatal severe infection/sepsis between baseline and intervention period as recommended by Copas et al, to verify the assumptions used in our sample size calculation.<sup>3</sup>

#### Other descriptive analyses

We will additionally report summary statistics of data collected during the intervention period, including potential mediating variables:

- Days with central venous catheter
- Days with peripheral venous catheter
- Days with invasive ventilation
- Days with non-invasive ventilation
- Receipt of probiotics

We will not do a formal mediation analysis. Finally, we will describe surgical procedures that infants underwent during the study period, stratified by intervention arm:

- Number of procedures by type of procedure (categorized)
- Distribution of the number of procedures per infant
- Median day of life on which first procedure took place + inter-quartile range
- A surgical procedure at least 48 hours before a first endpoint

### **7.2.2 General approach**

To analyse the effect of the study intervention on study endpoints, we will primarily use mixed effects regression models on infant-level data, with a random intercept for cluster to account for intra-cluster correlation. When appropriate, we will also include a correlation structure to take into account dependency of observations that happen close in time; in that case, the specific correlation structure will be selected based on the Akaike Information Criterion. To estimate the intervention effect, the two determinants of interest will be (1) the randomly allocated intervention and (2) time in months since start of the intervention period (being zero for control clusters, assuming a linear effect). Regression link functions will be selected based on the distributional properties of the endpoint of interest. To adjust for baseline cluster differences and account for the restricted randomisation, we will include cluster level covariates from the baseline period that were also used for the restricted randomisation procedure in an analysis of covariance (ANCOVA) approach.<sup>11</sup> These cluster-level covariates from the baseline period are: cumulative incidence of neonatal severe infection/sepsis, average proportion of resistant colonisation, average total duration of StSC receipt per day, country and cluster size. For specific endpoints we also include its cluster-level mean from the baseline as a

covariate. In addition, the models will include important infant-level characteristics present at admission where appropriate.

To take into account the low number of clusters, small-sample adjustment will be done using the Between-Within approximation of denominator degrees of freedom.<sup>12,13</sup> The result will be reported as effect estimate with 95% confidence interval for the two determinants of interest. To statistically test the general hypothesis that the study intervention affects the outcome of interest, we will perform a likelihood ratio test, comparing the full model with a model not including the two determinants of interest. We will also report the estimated intervention effect at 3, 6 and 9 months after the start of the intervention period using the joint estimates for the two determinants of interest; the confidence intervals for the joint estimates will be derived from the variance-covariance matrix.

For endpoints with repeated cross-sectional assessment from PPS during the intervention period (resistant bacterial colonization, receipt of StSC, receipt of breastfeeding or mother's milk), we will additionally include a random intercept at the infant level to incorporate repeated measurements within the infant.

In case there is no appropriate fit of the infant-level mixed-effects regression model for one of the endpoints, we will replace this analysis for a cluster-level analysis, in which we aggregate outcomes at the cluster level and compare these using an equivalent covariate-adjusted residual estimator to take into account cluster-level and infant-level covariates.<sup>14-16</sup> For the endpoints derived from PPSs we will first consider aggregation at the level of the PPS before further simplifying to cluster-level aggregation. Otherwise, if the model assumptions are not violated, we will perform these cluster-level analyses of primary and secondary outcomes as sensitivity analyses, i.e. to check for robustness of the result of the analysis. We will perform two additional sensitivity analyses: one in which we only include the allocated intervention group as the determinant of interest, and one in which we only include time in months since start of intervention period as the determinant of interest.

For outcomes that are collected at the cluster-aggregated level (surveillance-based neonatal severe infection/sepsis and major non-infection neonatal morbidity), cluster-level analysis is the primary and only approach. As no time resolution within the intervention period is available for these outcomes, only the allocated intervention will be included as determinant of interest.

Any deviations from this approach will be reported as unplanned analyses.

### **7.2.3 Analysis details for primary and secondary outcomes**

Analysis details for all primary and secondary outcomes are listed in X†: data relevant for the composite outcome of major non-infection neonatal morbidity

O: indicates electronic data capture system and forms to be used

Supplement Table 2 and include details on the planned level of analysis, statistical method, outcome measure, determinants of interest, fixed covariates, random effects, measure of association, sensitivity analyses and subgroup analyses. In addition, we will describe here the analysis details for the primary (neonatal severe infection/sepsis), main secondary outcome (resistant bacterial colonisation) and the secondary cluster-aggregated outcomes (surveillance-based neonatal severe infection/sepsis and major non-infection neonatal morbidity). Other secondary endpoints are analysed in similar manners and are therefore not additionally detailed here.

#### Neonatal severe infection/sepsis

We will compare the cumulative incidence of neonatal severe infection/sepsis in infants in the intervention arm compared to the control arm using a mixed-effects logistic regression model, with random intercept for cluster. The two determinants of interest are allocated intervention group and time in months since end of the wash-in period (being zero for control hospitals). We will include co-variates used for restricted randomisation (cluster-level aggregated data from the baseline period) at the cluster level, to adjust for cluster-level variation. In addition, we will include birth weight, gestational age, and mode of delivery (vaginal birth or caesarean section) at the infant level to adjust for these covariates. The result will be reported as odds ratio with 95% confidence interval. We will perform a subgroup analysis in extremely premature infants (born before 28 weeks of gestational age) and non-extremely premature infants (born at or after 28 weeks of gestational age).

#### Resistant bacterial colonisation

We will compare the proportion of infants colonised during PPSs in the intervention arm to the control arm using a mixed effects time-series analysis, with random intercept and random time-slope at the cluster level and random intercept at the infant-level. The two determinants of interest are allocated intervention group and time in months since end of the wash-in period (being zero for control hospitals). We will include co-variates used for restricted randomisation, birth weight, gestational age, and mode of delivery (vaginal birth or caesarean section). The result will be reported as odds ratio with 95% confidence interval. We will perform a subgroup analysis in extremely premature infants (born before 28 weeks of gestational age) and non-extremely premature infants (born at or after 28 weeks of gestational age).

#### Secondary cluster-aggregated outcomes

We will compare the cluster-level cumulative incidence of surveillance-based neonatal severe infection/sepsis and major non-infection neonatal morbidity between the intervention and control arm. As these outcomes are collected at the cluster-aggregated level, these analyses will follow the cluster-level approach using the covariate-adjusted residual estimator as described in section 6.2.2, with the allocated intervention as the determinant of interest. For both outcomes, we will adjust for the baseline cluster-level value of the same outcome. As no individual-level data are available for these analyses, adjustment for infant-level covariates is not possible.

### **7.2.4 Exploratory outcomes**

We will define parameters needed to model acquisition of resistant colonisation in infants in both intervention and control clusters, e.g. colonisation pressure on the unit over time, number of high-risk and non-high-risk infants hospitalized at the unit and duration of hospitalization. We will subsequently develop a mathematical model that best describes acquisition of resistant colonization using these

parameters and compare acquisition of resistant colonisation between the intervention and control arm.

We will explore the effect of the intervention among high-risk infants on cumulative incidences of laboratory confirmed bloodstream infection with a relevant multidrug resistant pathogen, SSIs, including superficial, deep or organ-space SSI, and DAIs. In addition, we will compare days on antibiotic treatment per antibiotic substance groups and the prevalence of breastfeeding and mother's milk intake and days with human milk intake among high-risk infants in both groups.

### **7.3 MISSING DATA**

We intend to collect complete clinical data from all enrolled infants and have a monitoring plan in place to prevent missing data (see Section 6.4). If there are missing data in any of the covariates used in the regression, these will be handled using multiple imputation. Missing data on clinical outcomes (e.g. occurrence of sepsis) are expected to be rare and will not be imputed.

Stool sampling is planned 1- or 4-weekly during cross-sectional point prevalence surveys (PPS) and is dependent on production of stool of infants at the unit. We therefore anticipate missing data for resistant bacterial colonisation. For the analyses on resistant bacterial colonisation, we will use two approaches. The primary approach is to perform only complete case analysis per PPS, i.e. ignoring non-collected or non-analysed samples. We will explore the validity of this approach by using a two-step imputation approach. First, based on last observation carried forward (LOCF), infants with a previous PPS result showing resistant bacterial colonisation prior to the missing PPS will be imputed deterministically to be colonised. This is in line with the assumption that it is unlikely infants lose their resistant bacterial colonisation during the same admission. Next, using multiple imputation by chained equations, we will impute missing data on resistant bacterial colonisation for all other missing PPS.

### **7.4 SAFETY**

For the assessment of safety during the study we refer to the study protocol.

### **7.5 INTERIM ANALYSES**

There are no interim analyses planned.

## **8 REFERENCES**

1. Hemming K, Marsh J. A Menu-Driven Facility for Sample-Size Calculations in Cluster Randomized Controlled Trials. *The Stata Journal* 2013; **13**(1): 114-35.
2. Enteral lactoferrin supplementation for very preterm infants: a randomised placebo-controlled trial. *Lancet* 2019; **393**(10170): 423-33.
3. Copas AJ, Hooper R. Cluster randomised trials with different numbers of measurements at baseline and endline: Sample size and optimal allocation. *Clinical Trials* 2020; **17**(1): 69-76.
4. Gamble C, Krishan A, Stocken D, et al. Guidelines for the Content of Statistical Analysis Plans in Clinical Trials. *JAMA* 2017; **318**(23): 2337-43.
5. Schulz KF, Altman DG, Moher D. CONSORT 2010 Statement: updated guidelines for reporting parallel group randomised trials. *Trials* 2010; **11**: 32.
6. Campbell MK, Piaggio G, Elbourne DR, Altman DG. Consort 2010 statement: extension to cluster randomised trials. *Bmj* 2012; **345**: e5661.

7. Russell NJ, Stöhr W, Plakkal N, et al. Patterns of antibiotic use, pathogens, and prediction of mortality in hospitalized neonates and young infants with sepsis: A global neonatal sepsis observational cohort study (NeoOBS). *PLoS Med* 2023; **20**(6): e1004179.
8. Hsia Y, Lee BR, Versporten A, et al. Use of the WHO Access, Watch, and Reserve classification to define patterns of hospital antibiotic use (AWaRe): an analysis of paediatric survey data from 56 countries. *Lancet Glob Health* 2019; **7**(7): e861-e71.
9. Ridout MS, Demétrio CG, Firth D. Estimating intraclass correlation for binary data. *Biometrics* 1999; **55**(1): 137-48.
10. Chakraborty H, Hossain A. R package to estimate intracluster correlation coefficient with confidence interval for binary data. *Computer Methods and Programs in Biomedicine* 2018; **155**: 85-92.
11. Hooper R, Forbes A, Hemming K, Takeda A, Beresford L. Analysis of cluster randomised trials with an assessment of outcome at baseline. *BMJ* 2018; **360**: k1121.
12. Li P, Redden DT. Comparing denominator degrees of freedom approximations for the generalized linear mixed model in analyzing binary outcome in small sample cluster-randomized trials. *BMC Med Res Methodol* 2015; **15**: 38.
13. Leyrat C, Morgan KE, Leurent B, Kahan BC. Cluster randomized trials with a small number of clusters: which analyses should be used? *Int J Epidemiol* 2018; **47**(1): 321-31.
14. Lauer SA, Reich NG, Balzer LB. The covariate-adjusted residual estimator and its use in both randomized trials and observational settings. *arXiv preprint arXiv:191011397* 2019.
15. Bennett S, Parpia T, Hayes R, Cousens S. Methods for the analysis of incidence rates in cluster randomized trials. *Int J Epidemiol* 2002; **31**(4): 839-46.
16. Hayes RJ, Moulton LH. *Cluster Randomised Trials*: CRC Press; 2017.
17. Zhou B, Fine J, Latouche A, Labopin M. Competing risks regression for clustered data. *Biostatistics* 2012; **13**(3): 371-83.

## 9 SUPPLEMENT

### 9.1 SUPPLEMENT TABLE 1

Overview of data collection approaches for required endpoints

| Endpoint                                                                     | Relevant for which outcome type |    |             |                | Instrument |        |            |
|------------------------------------------------------------------------------|---------------------------------|----|-------------|----------------|------------|--------|------------|
|                                                                              | Main study                      |    |             |                | DHIS2      | REDCap |            |
|                                                                              | 1°                              | 2° | Exploratory | Implementation |            | PPS    | Unit-level |
| <b>Infection outcomes</b>                                                    |                                 |    |             |                |            |        |            |
| Neonatal severe infection/sepsis                                             | X                               | X  |             |                | O          |        |            |
| Resistant bacterial colonisation                                             |                                 | X  |             |                |            | O      |            |
| Laboratory-confirmed bloodstream infection                                   |                                 | X  |             |                | O          |        |            |
| Clinical sepsis                                                              |                                 | X  |             |                | O          |        |            |
| Pneumonia                                                                    |                                 | X  |             |                | O          |        |            |
| Necrotising enterocolitis                                                    |                                 | X  |             |                | O          |        |            |
| Antibiotic use                                                               |                                 | X  |             |                | O          | O      |            |
| Laboratory-confirmed bloodstream infection with multidrug-resistant pathogen |                                 |    | X           |                | O          |        |            |
| Surgical Site Infection                                                      |                                 |    | X           |                | O          |        |            |
| Device-associated infection                                                  |                                 |    | X           |                | O          |        |            |
| <b>Other neonatal outcomes</b>                                               |                                 |    |             |                |            |        |            |
| Neonatal unit mortality                                                      |                                 | X  |             |                | O          |        |            |
| Length of stay                                                               |                                 | X  |             |                | O          |        |            |
| Medically or surgically treated ROP                                          |                                 | X† |             |                |            |        | O          |
| Grade III or grade IV (high-grade) IVH                                       |                                 | X† |             |                |            |        | O          |
| Cystic PVL                                                                   |                                 |    |             |                |            |        | O          |
| BPD of any grade at 36 weeks' post-menstrual age                             |                                 | X† |             |                |            |        | O          |
| Breastfed/mother's milk intake                                               |                                 |    | X           |                |            | O      |            |
| Human milk intake                                                            |                                 |    | X           |                | O          |        |            |
| <b>Implementation outcomes (infant-level)</b>                                |                                 |    |             |                |            |        |            |
| Receipt of minimum expected target duration of StSC                          |                                 | X  |             | X              |            | O      |            |
| Number of minutes/hours of StSC per 24h                                      |                                 | X  |             | X              |            | O      |            |

X†: data relevant for the composite outcome of major non-infection neonatal morbidity

O: indicates electronic data capture system and forms to be used

## 9.2 SUPPLEMENT TABLE 2

Overview of statistical methods for trial endpoints

| Endpoint                                                                                                                                                                                                                        | Level of analysis                 | Statistical method               | Outcome measure      | Determinants of interest                                                                                                                                                                     | Fixed covariates                                                                         | Random effects                                                                                                                                                | Measure of association                  | Sensitivity analysis                                                                                                                                                                                                                                                                                                                                                           | Subgroup analyses                                                                                     |
|---------------------------------------------------------------------------------------------------------------------------------------------------------------------------------------------------------------------------------|-----------------------------------|----------------------------------|----------------------|----------------------------------------------------------------------------------------------------------------------------------------------------------------------------------------------|------------------------------------------------------------------------------------------|---------------------------------------------------------------------------------------------------------------------------------------------------------------|-----------------------------------------|--------------------------------------------------------------------------------------------------------------------------------------------------------------------------------------------------------------------------------------------------------------------------------------------------------------------------------------------------------------------------------|-------------------------------------------------------------------------------------------------------|
| <b>Neonatal severe infection/sepsis</b>                                                                                                                                                                                         | Primary analysis: at infant level | Mixed-effect logistic regression | Cumulative incidence | <ol style="list-style-type: none"> <li>1. The randomly allocated intervention</li> <li>2. Time in months since start of the intervention period (being zero for control clusters)</li> </ol> | Birth weight, gestational age, and mode of delivery (vaginal birth or caesarean section) | Random intercept at cluster level                                                                                                                             | Odds ratio with 95% confidence interval | <ol style="list-style-type: none"> <li>1. Analysis at the cluster level using covariate-adjusted residuals estimator<sup>1</sup></li> <li>2. Only include the allocated intervention group as the determinant of interest</li> <li>3. Only include time in months since start of intervention period as the determinant of interest</li> </ol>                                 | Gestational age before 28 weeks versus at or after 28 weeks                                           |
| <b>Resistant bacterial colonization</b><br><ol style="list-style-type: none"> <li>1. Overall</li> <li>2. Extended-spectrum beta-lactamase</li> <li>3. Carbapenemase</li> <li>4. Vancomycin resistance in enterococci</li> </ol> | Primary analysis: at infant level | Mixed-effect time series         | Prevalence           | <ol style="list-style-type: none"> <li>1. The randomly allocated intervention</li> <li>2. Time in months since start of the intervention period (being zero for control clusters)</li> </ol> | Birth weight, gestational age, and mode of delivery (vaginal birth or caesarean section) | <ol style="list-style-type: none"> <li>1. Random intercept and random time-slope at cluster level</li> <li>2. Random intercept at the infant-level</li> </ol> | Odds ratio with 95% confidence interval | <ol style="list-style-type: none"> <li>1. Analysis at the PPS level, or alternatively the cluster level using covariate-adjusted residuals estimator<sup>1</sup></li> <li>2. Only include the allocated intervention group as the determinant of interest</li> <li>3. Only include time in months since start of intervention period as the determinant of interest</li> </ol> | Gestational age before 28 weeks versus at or after 28 weeks (for overall resistant colonization only) |
| <b>Clinical sepsis</b><br><br><b>LC-BSI</b><br><br><b>Pneumonia</b>                                                                                                                                                             | Primary analysis: at infant level | Mixed-effect logistic regression | Cumulative incidence | <ol style="list-style-type: none"> <li>1. The randomly allocated intervention</li> <li>2. Time in months since start of the intervention period (being zero for</li> </ol>                   | Birth weight, gestational age, and mode of delivery (vaginal birth or caesarean section) | Random intercept at cluster level                                                                                                                             | Odds ratio with 95% confidence interval | <ol style="list-style-type: none"> <li>1. Analysis at the cluster level using covariate-adjusted residuals estimator<sup>1</sup></li> <li>2. Only include the allocated intervention group as the determinant of interest</li> </ol>                                                                                                                                           |                                                                                                       |

| Endpoint                                                              | Level of analysis                 | Statistical method                                                                                                                        | Outcome measure      | Determinants of interest                                                                                                             | Fixed covariates                                                                                             | Random effects                    | Measure of association                            | Sensitivity analysis                                                                                                                                                                                                                                                              | Subgroup analyses |
|-----------------------------------------------------------------------|-----------------------------------|-------------------------------------------------------------------------------------------------------------------------------------------|----------------------|--------------------------------------------------------------------------------------------------------------------------------------|--------------------------------------------------------------------------------------------------------------|-----------------------------------|---------------------------------------------------|-----------------------------------------------------------------------------------------------------------------------------------------------------------------------------------------------------------------------------------------------------------------------------------|-------------------|
| NEC                                                                   |                                   |                                                                                                                                           |                      | control clusters)                                                                                                                    |                                                                                                              |                                   |                                                   | 3. Only include time in months since start of intervention period as the determinant of interest                                                                                                                                                                                  |                   |
| Neonatal severe infection/sepsis<br><br>LC-BSI<br><br>Clinical sepsis | Primary analysis: at infant level | Mixed-effect Poisson regression (or negative binomial) with the log(number of admission days) during the intervention period as an offset | Incidence rate       | 1. The randomly allocated intervention<br>2. Time in months since start of the intervention period (being zero for control clusters) | Birth weight, gestational age, and mode of delivery (vaginal birth or caesarean section)                     | Random intercept at cluster level | Incidence rate ratio with 95% confidence interval | 1. Analysis at the cluster level using covariate-adjusted residuals estimator <sup>1</sup><br>2. Only include the allocated intervention group as the determinant of interest<br>3. Only include time in months since start of intervention period as the determinant of interest |                   |
| Surveillance-based neonatal severe infection/sepsis                   | At the cluster level              | Mixed-effects Poisson regression (or negative binomial) with the log(total number of admissions) as the offset                            | Cumulative incidence | The randomly allocated intervention                                                                                                  | Baseline cluster level surveillance-based neonatal severe infection/sepsis (log probability of the endpoint) | N.A.                              | Incidence rate ratio with 95% confidence interval |                                                                                                                                                                                                                                                                                   |                   |

| Endpoint                                      | Level of analysis                 | Statistical method                                                                                             | Outcome measure                     | Determinants of interest                                                                                                                                                               | Fixed covariates                                                                                                                                                   | Random effects                    | Measure of association                                                       | Sensitivity analysis                                                                                                                                                                                                                                                                                                                  | Subgroup analyses |
|-----------------------------------------------|-----------------------------------|----------------------------------------------------------------------------------------------------------------|-------------------------------------|----------------------------------------------------------------------------------------------------------------------------------------------------------------------------------------|--------------------------------------------------------------------------------------------------------------------------------------------------------------------|-----------------------------------|------------------------------------------------------------------------------|---------------------------------------------------------------------------------------------------------------------------------------------------------------------------------------------------------------------------------------------------------------------------------------------------------------------------------------|-------------------|
| <b>Major non-infection neonatal morbidity</b> | At the cluster level              | Mixed-effects Poisson regression (or negative binomial) with the log(total number of admissions) as the offset | Cumulative incidence                | The randomly allocated intervention                                                                                                                                                    | Baseline cluster level major non-infection neonatal morbidity (log probability of the endpoint)                                                                    | N.A.                              | Incidence rate ratio with 95% confidence interval                            |                                                                                                                                                                                                                                                                                                                                       |                   |
| <b>Neonatal unit mortality</b>                | Primary analysis: at infant level | Mixed-effect logistic regression                                                                               | Mortality (risk)                    | <ol style="list-style-type: none"> <li>The randomly allocated intervention</li> <li>Time in months since start of the intervention period (being zero for control clusters)</li> </ol> | Birth weight, gestational age, mode of delivery (vaginal birth or caesarean section) and baseline cluster level neonatal unit mortality (log odds of the endpoint) | Random intercept at cluster level | Odds ratio with 95% confidence interval                                      | <ol style="list-style-type: none"> <li>Analysis at the cluster level using covariate-adjusted residuals estimator<sup>1</sup></li> <li>Only include the allocated intervention group as the determinant of interest</li> <li>Only include time in months since start of intervention period as the determinant of interest</li> </ol> |                   |
| <b>Neonatal unit length of stay</b>           | Primary analysis: at infant level | Marginal Fine-Gray model with neonatal death as competing event <sup>17</sup>                                  | Time in days until discharged alive | <ol style="list-style-type: none"> <li>The randomly allocated intervention</li> <li>Time in months since start of the intervention period (being zero for</li> </ol>                   | Birth weight, gestational age, mode of delivery (vaginal birth or caesarean section) and baseline cluster level length of stay (log                                | Random intercept at cluster level | Absolute difference in number of admission days with 95% confidence interval | <ol style="list-style-type: none"> <li>Analysis at the cluster level using covariate-adjusted residuals estimator<sup>1</sup></li> <li>Cox proportional hazards regression to estimate the cause-specific hazard ratio instead of sub-</li> </ol>                                                                                     |                   |

| Endpoint                    | Level of analysis                     | Statistical method                                                                                                | Outcome measure                                                  | Determinants of interest                                                                                                                                                               | Fixed covariates                                                                          | Random effects                    | Measure of association                                                                       | Sensitivity analysis                                                                                                                                                                                                                                                                                                                  | Subgroup analyses     |
|-----------------------------|---------------------------------------|-------------------------------------------------------------------------------------------------------------------|------------------------------------------------------------------|----------------------------------------------------------------------------------------------------------------------------------------------------------------------------------------|-------------------------------------------------------------------------------------------|-----------------------------------|----------------------------------------------------------------------------------------------|---------------------------------------------------------------------------------------------------------------------------------------------------------------------------------------------------------------------------------------------------------------------------------------------------------------------------------------|-----------------------|
|                             |                                       |                                                                                                                   |                                                                  | control clusters)                                                                                                                                                                      | probability of the endpoint)                                                              |                                   |                                                                                              | <p>distribution hazard ratio</p> <p>3. Only include the allocated intervention group as the determinant of interest</p> <p>4. Only include time in months since start of intervention period as the determinant of interest</p>                                                                                                       |                       |
| <b>Antibiotic treatment</b> | Primary analysis: at infant level     | Mixed-effects Poisson regression (or negative binomial) with the log(total number of calendar days) as the offset | Days on antibiotic treatment                                     | <ol style="list-style-type: none"> <li>The randomly allocated intervention</li> <li>Time in months since start of the intervention period (being zero for control clusters)</li> </ol> | Baseline cluster level antibiotic use (proportion of infant days on antibiotic treatment) | Random intercept at cluster level | Incidence rate ratio for number of days on antibiotic treatment with 95% confidence interval | <ol style="list-style-type: none"> <li>Analysis at the cluster level using covariate-adjusted residuals estimator<sup>1</sup></li> <li>Only include the allocated intervention group as the determinant of interest</li> <li>Only include time in months since start of intervention period as the determinant of interest</li> </ol> |                       |
| <b>StSC duration</b>        | Primary analysis: at infant-PPS level | <p>Mixed-effects linear regression</p> <p>Covariate-adjusted residuals estimator</p>                              | Total duration of StSC in minutes during monthly 24-hour periods | <ol style="list-style-type: none"> <li>The randomly allocated intervention</li> <li>Time in months since start of the intervention period (being zero for control clusters)</li> </ol> | Birth weight and gestational age                                                          | Random intercept at cluster level | Difference in minutes with 95% confidence interval                                           | <ol style="list-style-type: none"> <li>Analysis at the cluster level using covariate-adjusted residuals estimator<sup>1</sup></li> <li>Only include the allocated intervention group as the determinant of interest</li> <li>Only include time in months since start of intervention period as</li> </ol>                             | Neonatal unit country |

| Endpoint                      | Level of analysis                     | Statistical method                | Outcome measure                                                                                 | Determinants of interest                                                                                                                                                                     | Fixed covariates                 | Random effects                    | Measure of association                                        | Sensitivity analysis                                                                                                                                                                                                                                                                                                                           | Subgroup analyses     |
|-------------------------------|---------------------------------------|-----------------------------------|-------------------------------------------------------------------------------------------------|----------------------------------------------------------------------------------------------------------------------------------------------------------------------------------------------|----------------------------------|-----------------------------------|---------------------------------------------------------------|------------------------------------------------------------------------------------------------------------------------------------------------------------------------------------------------------------------------------------------------------------------------------------------------------------------------------------------------|-----------------------|
|                               |                                       |                                   |                                                                                                 |                                                                                                                                                                                              |                                  |                                   |                                                               | the determinant of interest                                                                                                                                                                                                                                                                                                                    |                       |
| <b>StSC target attainment</b> | Primary analysis: at infant-PPS level | Mixed-effects logistic regression | Attainment of the site-level target for daily total duration of StSC per infant (binary yes/no) | <ol style="list-style-type: none"> <li>1. The randomly allocated intervention</li> <li>2. Time in months since start of the intervention period (being zero for control clusters)</li> </ol> | Birth weight and gestational age | Random intercept at cluster level | Odds ratio for target attainment with 95% confidence interval | <ol style="list-style-type: none"> <li>1. Analysis at the cluster level using covariate-adjusted residuals estimator<sup>1</sup></li> <li>2. Only include the allocated intervention group as the determinant of interest</li> <li>3. Only include time in months since start of intervention period as the determinant of interest</li> </ol> | Neonatal unit country |

<sup>1</sup>. In case there is no appropriate fit for infant-level analysis, the cluster-level analysis will replace the primary analysis.

## Certificaat betreffende voltooiing

Envelop-id: A36CE1A3-020A-457C-91C7-E7ACC98B543D

Status: Voltooid

Onderwerp: NeoDeco SAP V2.0\_Clean

Bronenvelop:

Documentpagina's: 29

Handtekeningen: 4

Opdrachtgever van envelop:

Certificaatpagina's: 6

Initialen: 0

Anna Ferrario

Begeleide ondertekening: Ingeschakeld

Corso Stati Uniti 4

Stempel met envelop-id plaatsen: Uitgeschakeld

Padova, PADOVA 35127

Tijdzone: (UTC+01:00) Amsterdam, Berlijn, Bern, Rome, Stockholm, Wenen

administration@pentaoundation.org

IP-adres: 94.138.185.28

## Records bijhouden

Status: Original

Houder: Anna Ferrario

Locatie: DocuSign

25-2-2026 10:11:11

administration@pentaoundation.org

## Ondertekenaargebeurtenissen

## Handtekening

## Tijdstempel

Henri van Werkhoven

C.H.vanWerkhoven@umcutrecht.nl

Beveiligingsniveau: E-mailadres, Accountverificatie (verplicht), Ingelogd

Verzonden: 25-2-2026 11:21:52

Bekeken: 25-2-2026 13:27:17

Ondertekend: 25-2-2026 13:29:18

Aanneming van de handtekening Afbeelding geüploade handtekening

Handtekening-id:

4D41E14B-BCB6-4C5D-A736-E0E52F6A4DF1

IP-adres gebruiken: 143.121.239.17

Met ondertekeningsverificatie via

DocuSign-wachtwoord

Met redenen voor ondertekening (op elk tabblad):

Ik keur dit document goed

### Elektronische document- en handtekeninginformatie:

Geaccepteerd: 25-2-2026 13:27:17

ID: e51a27a3-6d4d-4c5d-82ed-e2ac194a3359

Julia Bielicki

JuliaAnna.Bielicki@ukbb.ch

Professor in Paediatric Infectious Diseases

Beveiligingsniveau: E-mailadres, Accountverificatie (verplicht), Ingelogd

Verzonden: 25-2-2026 13:29:23

Bekeken: 2-3-2026 08:19:55

Ondertekend: 2-3-2026 08:20:23

Aanneming van de handtekening Vooraf geselecteerde stijl

Handtekening-id:

308F8D3D-5047-49F1-BFE4-1F84942F18D5

IP-adres gebruiken: 131.152.222.182

Met ondertekeningsverificatie via

DocuSign-wachtwoord

Met redenen voor ondertekening (op elk tabblad):

I approve this document

### Elektronische document- en handtekeninginformatie:

Geaccepteerd: 2-3-2026 08:19:55

ID: c908e172-7326-4473-9549-e643321c22ae

| Ondertekenaargebeurtenissen | Handtekening | Tijdstempel |
|-----------------------------|--------------|-------------|
|-----------------------------|--------------|-------------|

Elske Sieswerda  
E.Sieswerda@umcutrecht.nl  
Beveiligingsniveau: E-mailadres, Accountverificatie (verplicht), Ingelogd

*Elske Sieswerda*

Verzonden: 2-3-2026 08:20:28  
Bekeken: 2-3-2026 09:15:21  
Ondertekend: 2-3-2026 09:16:22

Aanneming van de handtekening Vooraf  
geselecteerde stijl  
Handtekening-id:  
ED1706E6-84E8-4E39-AADC-DC19F33E0F08  
IP-adres gebruiken: 143.121.239.227

Met ondertekeningsverificatie via  
DocuSign-wachtwoord  
Met redenen voor ondertekening (op elk tabblad):  
Ik heb dit document gecontroleerd

**Elektronische document- en handtekeninginformatie:**

Geaccepteerd: 2-3-2026 09:15:21  
ID: baca3bb2-cb39-4f53-8949-60594c946c02

Laura Mangiarini  
laura.mangiarini@pentafoundation.org  
Chief Program Officer  
Laura Mangiarini  
Beveiligingsniveau: E-mailadres, Accountverificatie (verplicht), Ingelogd

*Laura Mangiarini*

Verzonden: 25-2-2026 10:17:29  
Opnieuw verzonden: 2-3-2026 09:16:29  
Bekeken: 25-2-2026 10:28:38  
Ondertekend: 2-3-2026 12:55:11

Aanneming van de handtekening Vooraf  
geselecteerde stijl  
Handtekening-id:  
0F5FD31B-1226-40C7-A5AB-4A3E74F51EAC  
IP-adres gebruiken: 151.62.226.255

Met ondertekeningsverificatie via  
DocuSign-wachtwoord  
Met redenen voor ondertekening (op elk tabblad):  
Approvo il documento

**Elektronische document- en handtekeninginformatie:**

Geaccepteerd: 26-3-2025 12:23:08  
ID: 43ccc6a8-1d36-4ea9-a8ca-d84f2210f39f

| Gebeurtenissen voor persoonlijke ondertekenaar | Handtekening | Tijdstempel |
|------------------------------------------------|--------------|-------------|
|------------------------------------------------|--------------|-------------|

| Verzendingsgebeurtenissen voor bewerker | Status | Tijdstempel |
|-----------------------------------------|--------|-------------|
|-----------------------------------------|--------|-------------|

| Verzendingsgebeurtenissen voor vertegenwoordiger | Status | Tijdstempel |
|--------------------------------------------------|--------|-------------|
|--------------------------------------------------|--------|-------------|

| Verzendingsgebeurtenissen voor tussenpersoon | Status | Tijdstempel |
|----------------------------------------------|--------|-------------|
|----------------------------------------------|--------|-------------|

| Gecertificeerde verzendingsgebeurtenissen | Status | Tijdstempel |
|-------------------------------------------|--------|-------------|
|-------------------------------------------|--------|-------------|

| Carbon copy-gebeurtenissen | Status | Tijdstempel |
|----------------------------|--------|-------------|
|----------------------------|--------|-------------|

Selene Parenti  
selene.parenti@pentafoundation.org  
Beveiligingsniveau: E-mailadres, Accountverificatie (verplicht)

**Gekopieerd**

Verzonden: 25-2-2026 10:17:29

**Elektronische document- en handtekeninginformatie:**

| Carbon copy-gebeurtenissen                                                                                                                                                                                                                                                                                           | Status            | Tijdstempel                                                |
|----------------------------------------------------------------------------------------------------------------------------------------------------------------------------------------------------------------------------------------------------------------------------------------------------------------------|-------------------|------------------------------------------------------------|
| Niet aangeboden via Docusign                                                                                                                                                                                                                                                                                         |                   |                                                            |
| Elske Sieswerda<br>E.Sieswerda@umcutrecht.nl<br>Beveiligingsniveau: E-mailadres, Accountverificatie (verplicht)<br><b>Elektronische document- en handtekeninginformatie:</b><br>Geaccepteerd: 2-3-2026 09:15:21<br>ID: baca3bb2-cb39-4f53-8949-60594c946c02                                                          | <b>Gekopieerd</b> | Verzonden: 2-3-2026 12:55:16<br>Bekeken: 2-3-2026 16:16:07 |
| Henri van Werkhoven<br>C.H.vanWerkhoven@umcutrecht.nl<br>Beveiligingsniveau: E-mailadres, Accountverificatie (verplicht)<br><b>Elektronische document- en handtekeninginformatie:</b><br>Geaccepteerd: 25-2-2026 13:27:17<br>ID: e51a27a3-6d4d-4c5d-82ed-e2ac194a3359                                                | <b>Gekopieerd</b> | Verzonden: 2-3-2026 12:55:16                               |
| Julia Bielicki<br>JuliaAnna.Bielicki@ukbb.ch<br>Professor in Paediatric Infectious Diseases<br>Beveiligingsniveau: E-mailadres, Accountverificatie (verplicht)<br><b>Elektronische document- en handtekeninginformatie:</b><br>Geaccepteerd: 2-3-2026 08:19:55<br>ID: c908e172-7326-4473-9549-e643321c22ae           | <b>Gekopieerd</b> | Verzonden: 2-3-2026 12:55:17                               |
| Laura Mangiarini<br>laura.mangiarini@pentaoundation.org<br>Chief Program Officer<br>Laura Mangiarini<br>Beveiligingsniveau: E-mailadres, Accountverificatie (verplicht)<br><b>Elektronische document- en handtekeninginformatie:</b><br>Geaccepteerd: 26-3-2025 12:23:08<br>ID: 43ccc6a8-1d36-4ea9-a8ca-d84f2210f39f | <b>Gekopieerd</b> | Verzonden: 2-3-2026 12:55:17                               |
| Selene Parenti<br>selene.parenti@pentaoundation.org<br>Beveiligingsniveau: E-mailadres, Accountverificatie (verplicht)<br><b>Elektronische document- en handtekeninginformatie:</b><br>Niet aangeboden via Docusign                                                                                                  | <b>Gekopieerd</b> | Verzonden: 2-3-2026 12:55:17<br>Bekeken: 2-3-2026 13:22:38 |

| Getuige evenementen | Handtekening | Tijdstempel |
|---------------------|--------------|-------------|
|---------------------|--------------|-------------|

| Notarisgebeurtenissen | Handtekening | Tijdstempel |
|-----------------------|--------------|-------------|
|-----------------------|--------------|-------------|

| Gebeurtenissen voor envelopsamenvatting | Status | Tijdstempels |
|-----------------------------------------|--------|--------------|
|-----------------------------------------|--------|--------------|

|                          |                           |                    |
|--------------------------|---------------------------|--------------------|
| Envelop verzonden        | Gehasht/gecodeerd         | 25-2-2026 10:17:29 |
| Envelop bijgewerkt       | Beveiliging gecontroleerd | 25-2-2026 11:21:51 |
| Envelop bijgewerkt       | Beveiliging gecontroleerd | 25-2-2026 11:21:51 |
| Envelop bijgewerkt       | Beveiliging gecontroleerd | 25-2-2026 11:21:52 |
| Envelop bijgewerkt       | Beveiliging gecontroleerd | 25-2-2026 11:21:52 |
| Gecertificeerd verzonden | Beveiliging gecontroleerd | 25-2-2026 10:28:38 |
| Ondertekening voltooid   | Beveiliging gecontroleerd | 2-3-2026 12:55:11  |
| Voltooid                 | Beveiliging gecontroleerd | 2-3-2026 12:55:17  |

| Betalingsgebeurtenissen | Status | Tijdstempels |
|-------------------------|--------|--------------|
|-------------------------|--------|--------------|



## **ELECTRONIC RECORD AND SIGNATURE DISCLOSURE**

From time to time, Fondazione Penta ETS (we, us or Company) may be required by law to provide to you certain written notices or disclosures. Described below are the terms and conditions for providing to you such notices and disclosures electronically through the DocuSign system. Please read the information below carefully and thoroughly, and if you can access this information electronically to your satisfaction and agree to this Electronic Record and Signature Disclosure (ERSD), please confirm your agreement by selecting the check-box next to 'I agree to use electronic records and signatures' before clicking 'CONTINUE' within the DocuSign system.

### **Getting paper copies**

At any time, you may request from us a paper copy of any record provided or made available electronically to you by us. You will have the ability to download and print documents we send to you through the DocuSign system during and immediately after the signing session and, if you elect to create a DocuSign account, you may access the documents for a limited period of time (usually 30 days) after such documents are first sent to you. After such time, if you wish for us to send you paper copies of any such documents from our office to you, you will be charged a \$0.00 per-page fee. You may request delivery of such paper copies from us by following the procedure described below.

### **Withdrawing your consent**

If you decide to receive notices and disclosures from us electronically, you may at any time change your mind and tell us that thereafter you want to receive required notices and disclosures only in paper format. How you must inform us of your decision to receive future notices and disclosure in paper format and withdraw your consent to receive notices and disclosures electronically is described below.

### **Consequences of changing your mind**

If you elect to receive required notices and disclosures only in paper format, it will slow the speed at which we can complete certain steps in transactions with you and delivering services to you because we will need first to send the required notices or disclosures to you in paper format, and then wait until we receive back from you your acknowledgment of your receipt of such paper notices or disclosures. Further, you will no longer be able to use the DocuSign system to receive required notices and consents electronically from us or to sign electronically documents from us.

### **All notices and disclosures will be sent to you electronically**

Unless you tell us otherwise in accordance with the procedures described herein, we will provide electronically to you through the DocuSign system all required notices, disclosures, authorizations, acknowledgements, and other documents that are required to be provided or made available to you during the course of our relationship with you. To reduce the chance of you inadvertently not receiving any notice or disclosure, we prefer to provide all of the required notices and disclosures to you by the same method and to the same address that you have given us. Thus, you can receive all the disclosures and notices electronically or in paper format through the paper mail delivery system. If you do not agree with this process, please let us know as described below. Please also see the paragraph immediately above that describes the consequences of your electing not to receive delivery of the notices and disclosures electronically from us.

### **How to contact Fondazione Penta ETS:**

You may contact us to let us know of your changes as to how we may contact you electronically, to request paper copies of certain information from us, and to withdraw your prior consent to receive notices and disclosures electronically as follows:

To contact us by email send messages to: [administration@pentafoundation.org](mailto:administration@pentafoundation.org)

### **To advise Fondazione Penta ETS of your new email address**

To let us know of a change in your email address where we should send notices and disclosures electronically to you, you must send an email message to us at [administration@pentafoundation.org](mailto:administration@pentafoundation.org) and in the body of such request you must state:

your previous email address, your new email address. We do not require any other information from you to change your email address

If you created a DocuSign account, you may update it with your new email address through your account preferences.

### **To request paper copies from Fondazione Penta ETS**

To request delivery from us of paper copies of the notices and disclosures previously provided by us to you electronically, you must send us an email to [administration@pentafoundation.org](mailto:administration@pentafoundation.org) and in the body of such request you must state your email address, full name, mailing address, and telephone number. We will bill you for any fees at that time, if any.

### **To withdraw your consent with Fondazione Penta ETS**

To inform us that you no longer wish to receive future notices and disclosures in electronic format you may:

- i. decline to sign a document from within your signing session, and on the subsequent page, select the check-box indicating you wish to withdraw your consent, or you may;
- ii. send us an email to [administration@pentafoundation.org](mailto:administration@pentafoundation.org) and in the body of such request you must state your email, full name, mailing address, and telephone number. We do not need any other information from you to withdraw consent. The consequences of your withdrawing consent for online documents will be that transactions may take a longer time to process.

### **Required hardware and software**

The minimum system requirements for using the DocuSign system may change over time. The current system requirements are found here: <https://support.docusign.com/guides/signer-guide-signing-system-requirements>.

### **Acknowledging your access and consent to receive and sign documents electronically**

To confirm to us that you can access this information electronically, which will be similar to other electronic notices and disclosures that we will provide to you, please confirm that you have read this ERSD, and (i) that you are able to print on paper or electronically save this ERSD for your future reference and access; or (ii) that you are able to email this ERSD to an email address where you will be able to print on paper or save it for your future reference and access. Further, if you consent to receiving notices and disclosures exclusively in electronic format as described herein, then select the check-box next to 'I agree to use electronic records and signatures' before clicking 'CONTINUE' within the DocuSign system.

By selecting the check-box next to 'I agree to use electronic records and signatures', you confirm that:

- You can access and read this Electronic Record and Signature Disclosure; and
- You can print on paper this Electronic Record and Signature Disclosure, or save or send this Electronic Record and Disclosure to a location where you can print it, for future reference and access; and
- Until or unless you notify Fondazione Penta ETS as described above, you consent to receive exclusively through electronic means all notices, disclosures, authorizations, acknowledgements, and other documents that are required to be provided or made available to you by Fondazione Penta ETS during the course of your relationship with Fondazione Penta ETS.
