# Supplementary material
Source: Research Square preprint supplement (doi:10.21203/rs.3.rs-9150066/v1)
Supplement: Supplementary file 5 [file cfaffe6aa9d2cf60c491945c.docx]

**Additional file 3**

**List of participating sites in NeoDeco**

Stagger 1

*Greece*

- University General Hospital Attikon, Athens
- University Hospital of Heraklion, Heraklion
- Hippokration Hospital, Thessaloniki
- Ioannina University Hospital, Ioannina
- Papageorgiou Hospital, Thessaloniki

*Switzerland*

- University of Basel Children's Hospital, Basel
- Inselspital, University Hospital of Bern, Bern
- Hôpitaux Universitaires de Genève, Geneva
- Children's Hospital of Eastern Switzerland, St. Gallen
- University Hospital Zurich, Zurich

Stagger 2

*Greece*

- Aglaia Kyriakou Children’s Hospital, Athens
- University General Hospital of Patras, Patras

*Italy*

- Azienda Ospedaliera Universitaria Sant’Anna di Ferrara, Ferrara
- Azienda Ospedaliera Universitaria di Modena, Modena
- Ospedale Universitario Policlinico Paolo Giaccone, Palermo
- Ospedale San Bortolo di Vicenza, Vicenza

*Spain*

- Hospital General Universitario Alicante, Alicante
- Cruces University Hospital, Bilbao
- Hospital Regional Universitario de Málaga, Malaga

*United Kingdom*

- Birmingham Heartlands Hospital, Birmingham
- University Hospitals Coventry and Warwickshire, Coventry
- St George's University Hospitals, London
- St Mary’s Hospital, Manchester
- Norfolk and Norwich University Hospital NHS Foundation Trust, Norwich
