# Supplementary material
Source: Research Square preprint supplement (doi:10.21203/rs.3.rs-9150066/v1)
Supplement: Supplementary file 6 [file d3b96d5517ecd7b888872d2b.pdf]

## **Additional file 1: Ethics committee approvals and English translations for all participating sites**

### **Table of Contents**

|                                                                                                                                                                                                                                                |     |
|------------------------------------------------------------------------------------------------------------------------------------------------------------------------------------------------------------------------------------------------|-----|
| <b>Switzerland</b> – University of Basel Children’s Hospital, University Hospital of Bern, Hôpitaux Universitaires de Genève, Children’s Hospital of Eastern Switzerland St.Gallen, & University Hospital Zurich .....                         | 2   |
| <b>United Kingdom</b> – Birmingham Heartlands Hospital, University Hospitals Coventry and Warwickshire, St Mary’s Hospital, Manchester, St George’s Univeristy Hospitals, & Norfolk and Norwich University Hospital NHS Foundation Trust ..... | 19  |
| <b>Greece</b> – University General Hospital Attikon .....                                                                                                                                                                                      | 25  |
| <b>Greece</b> – University Hospital of Heraklion .....                                                                                                                                                                                         | 28  |
| <b>Greece</b> – Ioannina University Hospital .....                                                                                                                                                                                             | 38  |
| <b>Greece</b> – University General Hospital of Patras .....                                                                                                                                                                                    | 42  |
| <b>Greece</b> – Hippokration Hospital .....                                                                                                                                                                                                    | 45  |
| <b>Greece</b> – Aglaia Kyriakou Children’s Hospital, Athens .....                                                                                                                                                                              | 53  |
| <b>Greece</b> – Papageorgiou Hospital .....                                                                                                                                                                                                    | 64  |
| <b>Italy</b> – University Hospital Policlinico Paolo Giaccone, Palermo .....                                                                                                                                                                   | 81  |
| <b>Italy</b> – Azienda Ospedaliera Universitaria S.Anna di Ferrara .....                                                                                                                                                                       | 86  |
| <b>Italy</b> – Azienda Ospedaliera Universitaria di Modena .....                                                                                                                                                                               | 95  |
| <b>Italy</b> – Ospedale San Bortolo di Vicenza .....                                                                                                                                                                                           | 102 |
| <b>Spain</b> – Cruces University Hospital .....                                                                                                                                                                                                | 109 |
| <b>Spain</b> – Hospital Regional Universitario de Málaga (Carlos Haya) .....                                                                                                                                                                   | 114 |
| <b>Spain</b> – Hospital General Universitario Alicante .....                                                                                                                                                                                   | 121 |

## **Switzerland**

University of Basel Children's Hospital, University Hospital of Bern, Hôpitaux Universitaires de Genève,  
Children's Hospital of Eastern Switzerland St.Gallen, & University Hospital Zurich

Basel, 22. Januar 2024

## Verfügung der Ethikkommission Nordwest- und Zentralschweiz (EKNZ)

|                                            |                                                                                                                                                                                                                                                                        |
|--------------------------------------------|------------------------------------------------------------------------------------------------------------------------------------------------------------------------------------------------------------------------------------------------------------------------|
| <b>Wesentliche Änderung eingereicht am</b> | <b>Amendment 01 vom 28. Dezember 2023 (Protokoll - Version 2.0)</b>                                                                                                                                                                                                    |
| <b>Project-ID</b>                          | 18.01.2024                                                                                                                                                                                                                                                             |
| <b>Projekttitel</b>                        | 2023-00971                                                                                                                                                                                                                                                             |
| <b>Projektleitung</b>                      | Optimising kangaroo care to reduce neonatal severe infection/sepsis and resistant bacterial colonisation among high-risk infants in neonatal intensive care: a pragmatic, multicentre, parallel cluster randomised hybrid implementation-effectiveness trial (NeoDeco) |
| <b>Sponsor</b>                             | Dr. Julia Bielicki                                                                                                                                                                                                                                                     |
| <b>Zentren</b>                             | Fondazione Penta ETS, Federica D'Ambrosio                                                                                                                                                                                                                              |
|                                            | Dr. Julia Bielicki, Universitätskinderspital beider Basel, Basel                                                                                                                                                                                                       |

### Entscheidverfahren

- vereinfachtes Verfahren  Präsidialverfahren

### Entscheid

#### Dr. Julia Bielicki, Universitätskinderspital beider Basel, Basel

- Die Bewilligung wird erteilt  
 Die Bewilligung wird mit Auflagen erteilt  
 Die Bewilligung kann noch nicht erteilt werden  
 Die Bewilligung wird nicht erteilt

### Gebühren

**Betrag** CHF 250.-- **Tarifcode** 3.3.1

Gemäss der geltenden Gebührenordnung von swissethics.

### Rechtsmittelbelehrung

Gegen diesen Entscheid kann an den Regierungsrat des Kantons Basel-Stadt (Rathaus, Marktplatz 9, 4051 Basel) rekuriert werden. Der Rekurs ist innert 10 Tagen seit Eröffnung des Entscheides bei der Rekursinstanz anzumelden; innert 30 Tagen, vom gleichen Zeitpunkt an gerechnet, ist die Rekursbegründung einzureichen, welche die Anträge und deren Begründung mit Angabe der Beweismittel zu enthalten hat. Bei völliger oder teilweiser Abweisung des Rekurses können die Kosten der Rekurrentin respektive dem Rekurrenten ganz oder teilweise auferlegt werden.

## Kopie an

- BAG
- Sponsor
- Andere

Fondazione Penta ETS, federica.dambrosio@pentafoundation.org

Die Ethikkommission bestätigt, dass sie nach ICH-GCP arbeitet.

## Unterschrift

  
Prof. Dr. med. Christoph Beglinger  
Präsident

## Anhang:

1. Bedeutung der möglichen Entscheide
2. Liste der Dokumente, eingereicht am 18.01.2023

## Anhang 1

### Bedeutung der möglichen Entscheide

**Die Bewilligung wird erteilt:** Das Vorhaben kann gemäss der oben aufgeführten wesentlichen Änderung weitergeführt werden.

**Die Bewilligung wird mit Auflagen erteilt:** Das Forschungsprojekt kann gemäss der oben aufgeführten wesentlichen Änderung durchgeführt werden. Die Auflagen sind innert 30 Tagen zu erfüllen.

**Die Bewilligung kann noch nicht erteilt werden:** Das Vorhaben kann noch nicht gemäss der oben aufgeführten wesentlichen Änderung durchgeführt werden. Die Bedingungen sind zu erfüllen. Die revidierte Änderung wird nach Einreichung von der Ethikkommission geprüft.

**Die Bewilligung wird nicht erteilt:** Das Vorhaben kann in der vorliegenden Form nicht durchgeführt werden. Eine Neueinreichung der wesentlichen Änderung ist möglich.

## Anhang 2

### Liste der Dokumente, eingereicht am 18.01.2024

**Dr. Julia Bielicki, Universitätskinderhospital beider Basel, Basel**

| Dokument                                                              | Kategorie                                                                                                             | Dok.Datum  | Version |
|-----------------------------------------------------------------------|-----------------------------------------------------------------------------------------------------------------------|------------|---------|
| cover-letter-swiss-addendum-final.pdf                                 | 1. Cover Letter                                                                                                       | 11/01/2024 |         |
| signature-jb-cover-letter.pdf                                         | 1. Cover Letter                                                                                                       | 11/01/2024 |         |
| neodeco-addendum-gdpr-v1-0-final.pdf                                  | 3. ICF                                                                                                                | 04/01/2024 | 1.0     |
| neoipc-pic-bsl-version1-0-11-januar2024-final.pdf                     | 3. ICF                                                                                                                | 11/01/2024 | 1.0     |
| addendum-switzerland-v2-0-28dec-2023-final.pdf                        | 4. Study plan                                                                                                         | 28/12/2023 | 2.0     |
| neoipc-trial-protocol-neodeco-dv2-0-10aug2023-tracked.pdf             | 4. Study plan                                                                                                         | 10/08/2023 | 2.0     |
| addendum-page-1-signature-jb-lm.pdf                                   | 4. Study plan                                                                                                         | 28/12/2023 | 2.0     |
| neoipc-trial-protocol-neodeco-v2-0-31oct2023-clean-version-signed.pdf | 4. Study plan                                                                                                         | 10/08/2023 | 2.0     |
| addendum-page-2-signature-kj.pdf                                      | 4. Study plan                                                                                                         | 28/12/2023 | 2.0     |
| addendum-switzerland-v2-0-28dec-2023-track-change.pdf                 | 4. Study plan                                                                                                         | 28/12/2023 | 2.0     |
| neodeco-reseachagreement-ukbb-9763-40-signed.pdf                      | 9. Agreement                                                                                                          | 06/11/2023 |         |
| 230720-neodeco-ch-policy.pdf                                          | 10. Insurance                                                                                                         | 19/07/2023 |         |
| 230720-neodeco-ch-certificate.pdf                                     | 10. Insurance                                                                                                         | 20/07/2023 |         |
| ua-documentation.zip                                                  | 14. Information on secure handling of biological material and personal data, and in particular on the storage thereof | 18/01/2024 |         |

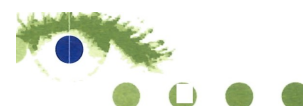

President  
 Prof. Christoph Beglinger  
 Vice Presidents  
 Prof. Thomas Kühne  
 Dr. Marco Schörer

Dr. Julia Bielicki  
 University Children's Hospital of Basel  
 Spitalstrasse 33  
 4031 Basel

Basel, January 22, 2024

## Decision of the Ethics Committee of Northwestern and Central Switzerland (EKNZ)

|                                                          |                                                                                                                                                                                                                                                                                                                                                                                    |
|----------------------------------------------------------|------------------------------------------------------------------------------------------------------------------------------------------------------------------------------------------------------------------------------------------------------------------------------------------------------------------------------------------------------------------------------------|
| Significant change<br>submitted on Project ID<br>Project | Amendment 01 of December 28, 2023 (Minutes - Version 2.0)<br>January 18, 2024<br>2023-0097 J<br>Optimising kangaroo care to reduce neonatal severe<br>infection/sepsis and resistant bacterial colonisation among high-risk<br>infants in neonatal intensive care: a pragmatic, multicentre, parallel<br>cluster randomised hybrid implementation-effectiveness trial<br>(NeoDeco) |
| Project management<br>Sponsor<br>Centers                 | Dr. Julia Bielicki<br>Fondazione Penta ETS, Federica D'Ambrosio<br>Dr. Julia Bielicki, University Children's Hospital Basel, Basel                                                                                                                                                                                                                                                 |

### Decision-making process

g Simplified procedure

Presidential procedure

### Decision

Dr. Julia Bielicki, University Children's Hospital Basel, Basel

Approval granted

- p The permit is granted subject to conditions
- p The permit cannot be granted at this time The permit is not granted

### Fees

Betrag CHF 250 Torifcode 3.3.1  
 In accordance with the applicable fee schedule of swissethics.

### Legal remedy

An appeal against this decision may be lodged with the Government Council of the Canton of Basel-Stadt (Town Hall, Marktplatz 9, 4051 Basel). The appeal must be lodged with the appeal authority within 0 days of the decision being announced: within 30 days of the same date, the grounds for appeal must be submitted, which must contain the requests and their justification, including details of the evidence. If the appeal is dismissed in whole or in part, the costs may be imposed in whole or in part on the appellant.

Copy to

- BAG
- Sponsor
- Others

Fondazione Pento ETS, federica.dambrosio@pentafoundation.org

The Ethics Committee confirms that it works in accordance with ICH-GCP.

Signed

  
Prof. Dr. med. Christoph Beglinger  
President

Appendix  
x:

1. Significance of possible decisions
2. List of documents submitted on January 8, 2023

Appendix 1

Significance of possible decisions

Approval is granted: The project can be continued in accordance with the significant changes listed above.

Approval is granted subject to conditions: The research project may be carried out in accordance with the significant change listed above. The conditions must be fulfilled within 30 days.

Approval cannot yet be granted: The project cannot yet be carried out in accordance with the significant change listed above. The conditions must be fulfilled. The revised change will be reviewed by the Ethics Committee after submission.

Approval is not granted: The project cannot be carried out in its current form. It is possible to resubmit the significant change.

## Appendix 2

List of documents submitted on January 8, 2024

Dr. Julia Bielicki, University Children's Hospital Basel, Basel

| Document                                                              | Category                                                                                                              | Doc. date  | Version |
|-----------------------------------------------------------------------|-----------------------------------------------------------------------------------------------------------------------|------------|---------|
| cover-letter-swiss-addendum-final.pdf                                 | 1. Cover Letter                                                                                                       | 11/01/2024 |         |
| signature-jb-cover-letter.pdf                                         | 1. Cover Letter                                                                                                       | 1/01/2024  |         |
| neodeco-addendum-gdpr-v1-0-final.pdf                                  | 3. ICF                                                                                                                | 04/01/2024 | 1.0     |
| neoipc-pic-bsl-version1-0-11-January2024-final.pdf                    | 3. ICF                                                                                                                | 11/01/2024 | 1.0     |
| addendum-switzerland-v2-0-28dec-2023-final.pdf                        | 4. Study plan                                                                                                         | 12/28/2023 | 2.0     |
| neoipc-trial-protocol-neodeco-dv2-0-10aug2023-tracked.pdf             | 4. Study plan                                                                                                         | 08/10/2023 | 2.0     |
| addendum-page-1-signature-jb-lm.pdf                                   | 4. Study plan                                                                                                         | 12/28/2023 | 2.0     |
| neoipc-trial-protocol-neodeco-v2-0-31oct2023-clean-version-signed.pdf | 4. Study plan                                                                                                         | 10/08/2023 | 2.0     |
| addendum-page-2-signature-kj.pdf                                      | 4. Study plan                                                                                                         | 12/28/2023 | 2.0     |
| addendum-switzerland-v2-0-28dec-2023-track-change.pdf                 | 4. Study plan                                                                                                         | 12/28/2023 | 2.0     |
| neodeco-researchagreement-ukbb-9763-40-signed.pdf                     | 9. Agreement                                                                                                          | 11/06/2023 |         |
| 230720-neodeco-ch-policy.pdf                                          | 10. Insurance                                                                                                         | 07/19/2023 |         |
| 230720-neodeco-ch-certificate.pdf                                     | 10. Insurance                                                                                                         | 07/20/2023 |         |
| ua-documentation.zip                                                  | 14. Information on secure handling of biological material and personal data, and in particular on the storage thereof | 18/01/2024 |         |

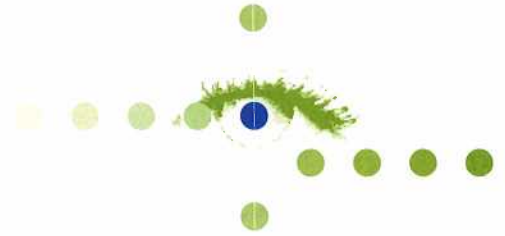

Präsident  
Prof. Christoph Beglinger  
Vizepräsidenten  
Prof. Thomas Kühne  
Dr. Marco Schärer

Dr. Julia Bielicki  
Universitäts-Kinderspital  
beider Basel  
Spitalstrasse 33  
4031 Basel

Basel, 7. März 2024 / nj

## Verfügung der Ethikkommission Nordwest- und Zentralschweiz (EKNZ)

|                                                   |                                                                                                                                                                                                                                                                        |
|---------------------------------------------------|------------------------------------------------------------------------------------------------------------------------------------------------------------------------------------------------------------------------------------------------------------------------|
| <b>Wesentliche Änderung eingereicht am</b>        | Zusätzliche Durchführungsorte, Übernahme der LeitEK Funktion<br>22.02.2024                                                                                                                                                                                             |
| <b>Project-ID</b>                                 | 2023-00971                                                                                                                                                                                                                                                             |
| <b>Projekttitel</b>                               | Optimising kangaroo care to reduce neonatal severe infection/sepsis and resistant bacterial colonisation among high-risk infants in neonatal intensive care: a pragmatic, multicentre, parallel cluster randomised hybrid implementation-effectiveness trial (NeoDeco) |
| <b>Projektleitung</b>                             | Dr. Julia Bielicki                                                                                                                                                                                                                                                     |
| <b>Sponsor</b>                                    | Fondazione Penta ETS, Federica D'Ambrosio                                                                                                                                                                                                                              |
| <b>Leit-Ethikkommission</b>                       | <b>Zentren</b>                                                                                                                                                                                                                                                         |
| Ethikkommission Nordwest- und Zentralschweiz EKNZ | Dr. Julia Bielicki, Universitätskinderspital beider Basel, Basel                                                                                                                                                                                                       |
| <b>Beteiligte Ethikkommission/en</b>              | <b>Zentren</b>                                                                                                                                                                                                                                                         |
| BE                                                | Dr. med. Benedikt Bubl, Med. Universitätsklinik für Kinderheilkunde - Neonatologie- Inselspital Bern, Bern                                                                                                                                                             |
| GE                                                | Dre Flavia Rosa Mangeret MD, MPH, Néonatalogie et Soins Intensifs Pédiatriques Hôpitaux Universitaires de Genève, CH-1211 Genève 14                                                                                                                                    |
| EKOS                                              | Dr. med. Stefanie Grabner, Ostschweizer Kinderspital IPS/Neonatologie, St. Gallen                                                                                                                                                                                      |
| ZH                                                | Dr. Susanne Böttger, Universitätsspital Zürich Klinik für Neonatologie, Zürich                                                                                                                                                                                         |

### Entscheidverfahren

- vereinfachtes Verfahren  Präsidialverfahren

### Entscheid

**Dr. Julia Bielicki, Universitätskinderspital beider Basel, Basel**

- Die Bewilligung wird erteilt  
 Die Bewilligung wird mit Auflagen erteilt  
 Die Bewilligung kann noch nicht erteilt werden

Geschäftsführerin Irene Oberli | Tellplatz 11 | 4053 Basel | Tel 061 268 13 50 | [eknz@bs.ch](mailto:eknz@bs.ch) | [www.eknz.ch](http://www.eknz.ch)

- Die Bewilligung wird nicht erteilt

Anmerkungen / Auflagen / Bedingungen / Begründung

Die EKNZ wird als Leit-Ethikkommission für das Projekt auftreten. Die Änderung im ICF und die Übersetzungen werden zur Kenntnis genommen.

**Dr. med. Benedikt Bubl, Med. Universitätsklinik für Kinderheilkunde - Neonatologie-  
Inselspital Bern, Bern**

---

- Die Bewilligung wird erteilt
- Die Bewilligung wird mit Auflagen erteilt
- Die Bewilligung kann noch nicht erteilt werden
- Die Bewilligung wird nicht erteilt

Anmerkungen / Auflagen / Bedingungen / Begründung

Entscheid basierend auf der Beurteilung durch die Kantonale Ethikkommission Bern.

**Dre Flavia Rosa Mangeret MD, MPH, Néonatalogie et Soins Intensifs Pédiatriques Hôpitaux  
Universitaires de Genève, CH-1211 Genève 14**

---

- Die Bewilligung wird erteilt
- Die Bewilligung wird mit Auflagen erteilt
- Die Bewilligung kann noch nicht erteilt werden
- Die Bewilligung wird nicht erteilt

Anmerkungen / Auflagen / Bedingungen / Begründung

Entscheid basierend auf der Beurteilung durch die Commission Cantonale d'éthique de la recherche Genève (CCER).

1. Dans l'ICF en français, vous utilisez beaucoup plus souvent l'expression "du/de la patient/e" alors qu'en anglais c'est l'expression "votre bébé" qui la remplace, ce qui est beaucoup plus proche du langage naturel. Merci de corriger.

**Dr. med. Stefanie Grabner, Ostschweizer Kinderspital IPS/Neonatalogie, St. Gallen**

---

- Die Bewilligung wird erteilt
- Die Bewilligung wird mit Auflagen erteilt
- Die Bewilligung kann noch nicht erteilt werden
- Die Bewilligung wird nicht erteilt

Anmerkungen / Auflagen / Bedingungen / Begründung

Entscheid basierend auf der Beurteilung durch die Ethikkommission Ostschweiz (EKOS).

- Bitte reichen Sie den finalen, signierten Vertrag nach.

**Dr. Susanne Böttger, Universitätsspital Zürich Klinik für Neonatalogie, Zürich**

---

- Die Bewilligung wird erteilt
- Die Bewilligung wird mit Auflagen erteilt
- Die Bewilligung kann noch nicht erteilt werden
- Die Bewilligung wird nicht erteilt

Anmerkungen / Auflagen / Bedingungen / Begründung

Entscheid basierend auf der Beurteilung durch die Kantonale Ethikkommission Zürich.

- Bitte reichen Sie den finalen, geprüften und vollständig unterschriebenen Studienvertrag nach.

## Gebühren

**Betrag** CHF 400.-- **Tarifcode 3.2.1**  
Gemäss der geltenden Gebührenordnung von swissethics.

## Rechtsmittelbelehrung

Gegen diesen Entscheid kann an den Regierungsrat des Kantons Basel-Stadt (Rathaus, Marktplatz 9, 4051 Basel) rekuriert werden. Der Rekurs ist innert 10 Tagen seit Eröffnung des Entscheides bei der Rekursinstanz anzumelden; innert 30 Tagen, vom gleichen Zeitpunkt an gerechnet, ist die Rekursbegründung einzureichen, welche die Anträge und deren Begründung mit Angabe der Beweismittel zu enthalten hat. Bei völliger oder teilweiser Abweisung des Rekurses können die Kosten der Rekurrentin respektive dem Rekurrenten ganz oder teilweise auferlegt werden.

## Kopie an

- BAG
- Sponsor Fondazione Penta ETS, federica.dambrosio@pentafoundation.org
- Beteiligte Kantonale Ethikkommission Bern  
Commission Cantonale d'éthique de la recherche Genève (CCER)  
Ethikkommission Ostschweiz (EKOS)  
Kantonale Ethikkommission Zürich
- Andere

Die Ethikkommission bestätigt, dass sie nach ICH-GCP arbeitet.

## Unterschriften

Prof. Dr. med. Christoph Beglinger  
Präsident

**Anhang:** -Bedeutung der möglichen Entscheide  
-Liste der Dokumente, eingereicht am 22.02.2024

## Anhang

### Bedeutung der möglichen Entscheide

**Die Bewilligung wird erteilt:** Das Vorhaben kann gemäss der oben aufgeführten wesentlichen Änderung weitergeführt werden.

**Die Bewilligung wird mit Auflagen erteilt:** Das Forschungsprojekt kann gemäss der oben aufgeführten wesentlichen Änderung durchgeführt werden. Die Auflagen sind innert 30 Tagen zu erfüllen.

**Die Bewilligung kann noch nicht erteilt werden:** Das Vorhaben kann noch nicht gemäss der oben aufgeführten wesentlichen Änderung durchgeführt werden. Die Bedingungen sind zu erfüllen. Die revidierte Änderung wird nach Einreichung von der Ethikkommission geprüft.

**Die Bewilligung wird nicht erteilt:** Das Vorhaben kann in der vorliegenden Form nicht durchgeführt werden. Eine Neueinreichung der wesentlichen Änderung ist möglich.

## Liste der Dokumente, eingereicht am 22.02.2024

### Dr. Julia Bielicki, Universitätskinderhospital beider Basel, Basel

| Dokument                                                   | Kategorie            | Dok.Datum  | Version |
|------------------------------------------------------------|----------------------|------------|---------|
| cover-letter-swiss-addendum-2024-02-22-final.pdf           | 1. Cover Letter      | 22/02/2024 |         |
| neodeco-pic-bsl-version2-0-25-januar2024-french-final.pdf  | 3. ICF               | 25/01/2024 | 2.0     |
| neodeco-pic-bsl-version2-0-25-januar2024-english-final.pdf | 3. ICF               | 25/01/2024 | 2.0     |
| neodeco-pic-bsl-version2-0-25-januar2024-italian-final.pdf | 3. ICF               | 25/01/2024 | 2.0     |
| neodeco-pic-bsl-version2-0-25-januar2024-german-final.pdf  | 3. ICF               | 25/01/2024 | 2.0     |
| neodeco-pic-bsl-version2-0-25-januar2024-german-tc.pdf     | 3. ICF               | 25/01/2024 | 2.0     |
| neodeco-protocol-addendum-switzerland-v2-0-28-dec-2023.pdf | 4. Study plan        | 28/12/2023 | 2.0     |
| cv-kerstin-jost-jan-24.pdf                                 | 6. Investigator's CV | 01/01/2024 |         |

### Dr. med. Benedikt Bubl, Med. Universitätsklinik für Kinderheilkunde - Neonatologie-Inselspital Bern, Bern

| Dokument                                                   | Kategorie            | Dok.Datum  | Version |
|------------------------------------------------------------|----------------------|------------|---------|
| neodeco-pic-be-version2-0-25-januar2024-german-final.pdf   | 3. ICF               | 25/01/2024 | 2.0     |
| neodeco-pic-be-version2-0-25-januar2024-italian-final.pdf  | 3. ICF               | 25/01/2024 | 2.0     |
| neodeco-pic-be-version2-0-25-januar2024-english-final.pdf  | 3. ICF               | 25/01/2024 | 2.0     |
| neodeco-pic-be-version2-0-25-januar2024-french-final.pdf   | 3. ICF               | 25/01/2024 | 2.0     |
| neodeco-protocol-addendum-switzerland-v2-0-28-dec-2023.pdf | 4. Study plan        | 28/12/2023 | 2.0     |
| cv-benedikt-bubl-20240108.pdf                              | 6. Investigator's CV | 08/01/2024 |         |
| neoipec-con-non-ben-bern-v1-0-20231124-signed-3-002.pdf    | 9. Agreement         | 14/12/2023 |         |

### Dre Flavia Rosa Mangeret MD, MPH, Néonatalogie et Soins Intensifs Pédiatriques Hôpitaux Universitaires de Genève, CH-1211 Genève 14

| Dokument                                                   | Kategorie            | Dok.Datum  | Version |
|------------------------------------------------------------|----------------------|------------|---------|
| neodeco-pic-hug-version2-0-25-januar2024-english-final.pdf | 3. ICF               | 25/01/2024 | 2.0     |
| neodeco-pic-hug-version2-0-25-januar2024-french-final.pdf  | 3. ICF               | 25/01/2024 | 2.0     |
| neodeco-pic-hug-version2-0-25-januar2024-italian-final.pdf | 3. ICF               | 25/01/2024 | 2.0     |
| neodeco-pic-hug-version2-0-25-januar2024-german-final.pdf  | 3. ICF               | 25/01/2024 | 2.0     |
| neodeco-protocol-addendum-switzerland-v2-0-28-dec-2023.pdf | 4. Study plan        | 28/12/2023 | 2.0     |
| cv-flavia-rosa-mangeret-20-12-2023.pdf                     | 6. Investigator's CV | 20/12/2023 |         |
| neoipec-con-neodecostudy-geneva-v1-0-02022024-clean-1.pdf  | 9. Agreement         | 02/02/2024 |         |

**Dr. med. Stefanie Grabner, Ostschweizer Kinderspital IPS/Neonatologie, St. Gallen**

| Dokument                                                   | Kategorie                                                 | Dok.Datum  | Version |
|------------------------------------------------------------|-----------------------------------------------------------|------------|---------|
| neodeco-pic-sg-version2-0-25-januar2024-italian-final.pdf  | 3. ICF                                                    | 25/01/2024 | 2.0     |
| neodeco-pic-sg-version2-0-25-januar2024-english-final.pdf  | 3. ICF                                                    | 25/01/2024 | 2.0     |
| neodeco-pic-sg-version2-0-25-januar2024-german-final.pdf   | 3. ICF                                                    | 25/01/2024 | 2.0     |
| neodeco-pic-sg-version2-0-25-januar2024-french-final.pdf   | 3. ICF                                                    | 25/01/2024 | 2.0     |
| neodeco-protocol-addendum-switzerland-v2-0-28-dec-2023.pdf | 4. Study plan                                             | 25/01/2024 | 2.0     |
| cv-stefanie-grabner-20240113.pdf                           | 6. Investigator's CV                                      | 13/01/2024 |         |
| neopc-con-stgallen-v0-1-20231103-draft-002.pdf             | 8. Details on infrastructure suitability and availability | 22/02/2024 |         |

**Dr. Susanne Böttger, Universitätsspital Zürich Klinik für Neonatologie, Zürich**

| Dokument                                                   | Kategorie            | Dok.Datum  | Version |
|------------------------------------------------------------|----------------------|------------|---------|
| neodeco-pic-uzh-version2-0-25-januar2024-german-final.pdf  | 3. ICF               | 25/01/2024 | 2.0     |
| neodeco-pic-uzh-version2-0-25-januar2024-italian-final.pdf | 3. ICF               | 25/01/2024 | 2.0     |
| neodeco-pic-uzh-version2-0-25-januar2024-french-final.pdf  | 3. ICF               | 25/01/2024 | 2.0     |
| neodeco-pic-uzh-version2-0-25-januar2024-english-final.pdf | 3. ICF               | 25/01/2024 | 2.0     |
| neodeco-protocol-addendum-switzerland-v2-0-28-dec-2023.pdf | 4. Study plan        | 28/12/2023 | 2.0     |
| cv-susanne-boettger-19-11-23.pdf                           | 6. Investigator's CV | 19/11/2023 |         |

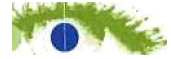

Basel, March 7, 2024 / nj

## Decision of the Ethics Committee of Northwestern and Central Switzerland (EKNZ)

|                                                               |                                                                                                                                                                                                                                                                                      |
|---------------------------------------------------------------|--------------------------------------------------------------------------------------------------------------------------------------------------------------------------------------------------------------------------------------------------------------------------------------|
| Significant change submitted on Project ID                    | Additional implementation locations, assumption of the LeitEK function 22                                                                                                                                                                                                            |
| Project title                                                 | 2023—00971<br>Optimizing kangaroo care to reduce neonatal severe infection/sepsis and resistant bacterial colonization among high-risk infants in neonatal intensive care: a pragmatic, multicenter, parallel cluster randomized hybrid implementation effectiveness trial (NeoDeco) |
| Project management                                            |                                                                                                                                                                                                                                                                                      |
| Sponsor                                                       | Dr. Julia Bielicki                                                                                                                                                                                                                                                                   |
| Lead Ethics Committee                                         | Fonazione Penta ETS, Feaerica D'Ambrosio Zenten                                                                                                                                                                                                                                      |
| Ethics Committee of Northwestern and Central Switzerland EKNZ | Dr. Julia Bielicki, University Children's Hospital Basel, Basel                                                                                                                                                                                                                      |
| Ethics committee(s) involved                                  | Zenten                                                                                                                                                                                                                                                                               |
| BE                                                            | Dr. Benedikt Bubl, University Clinic for Pediatrics - Neonatology - Inselspital Bern, Bern                                                                                                                                                                                           |
| GE                                                            | Dre Flavia Rosa Mangeret MD, MPH, Neonatology and Pediatric Intensive Care, University Hospitals of Geneva, CH-1211 Geneva 14                                                                                                                                                        |
| EKOS                                                          | Dr. Stefanie Grabner, Eastern Switzerland Children's Hospital IPS/Neonatology, St. Gallen                                                                                                                                                                                            |
| ZH                                                            | Dr. Susanne Böttger, University Hospital Zurich Clinic for Neonatology, Zurich                                                                                                                                                                                                       |

### Decision-making process

- Simplified procedure  Presidential procedure

### Decision

Dr. Julia Bielicki, University Children's Hospital Basel, Basel

- The permit is granted  
 The permit is granted with conditions  
 The permit cannot yet be granted

- a The permit is not granted

Comments / Notes / Conditions / Justification

The EKNZ will act as the lead ethics committee for this project. The change in the ICF and the translations are noted.

Dr. Benedikt Bubl, MD, University Clinic for Pediatrics – Neonatology, Inselspital Bern, Bern

---

- The permit is granted
- The permit is granted with conditions
- The permit cannot yet be granted
- The permit is not granted

Comments / Conditions / Requirements / Justification

Decision based on the assessment by the Cantonal Ethics Commission of Bern.

Dre Flavia Rosa Mangeret MD, MPH, Neonatology and Pediatric Intensive Care, Geneva University Hospitals, CH-1211 Geneva 14

---

- Approval is granted
- Approval is granted with conditions
- The permit cannot be granted yet
- Approval will not be granted

Comments / Requirements / Conditions / Justification

Decision based on the assessment by the Commission Cantonale d'éthique de la recherche Genève (CCER).

1. In the ICF in French, you use the expression "Öu/ae la patient/e" much more often, whereas in English it is replaced by the expression "votre bébé," which is much closer to natural language. Please correct this.

Dr. med. Stefanie Grabner, Eastern Switzerland Children's Hospital IPS/Neonatology, St. Gallen

---

- The permit is granted.
- The permit is granted subject to conditions
- The permit cannot yet be granted
- The permit is not granted

Comments / Conditions / Requirements / Justification

Decision based on the assessment by the Ethics Committee of Eastern Switzerland (EKOS).

- Please submit the final, signed contract.

Dr. Susanne Böttger, University Hospital Zurich Clinic for Neonatology, Zurich

---

- Approval is granted
- Approval is granted with conditions
- Approval cannot yet be granted
- The permit is not granted

Comments / Requirements / Conditions / Justification

Decision based on assessment by the Zurich Cantonal Ethics Committee.

Please submit the final, reviewed, and fully signed study contract.

#### Fees

Amount CHF 400 Torifcode 3.2.1  
In accordance with the applicable fee schedule of swissethics.

#### Information on legal remedies

An appeal against this decision may be lodged with the Government Council of the Canton of Basel-Stadt (Town Hall, Marktplatz 9, 4051 Basel). The appeal must be lodged with the appeal authority within 10 days of the decision being announced: within 30 days of the same date, the grounds for appeal must be submitted, which must contain the claims and their justification, including evidence. If the appeal is dismissed in whole or in part, the costs may be imposed in whole or in part on the appellant.

#### Copy to

BAG

g Sponsor Foundation Pento ETS, federica.dambrosio@pentafoundation.org  
g Ethics committee(s) involved Cantonal Ethics Committee Bern  
Geneva Cantonal Research Ethics Commission (CCER) Eastern  
Switzerland Ethics Commission (EKOS)  
Cantonal Ethics Committee Zurich

It Other

The Ethics Committee confirms that it works in accordance with ICH-GCP.

#### Signatures



Prof. Dr. med. Christoph Beglinger President

Appendix: -Significance of possible decisions  
-List of documents submitted on February 22, 2024

#### Appendix

##### Significance of the possible decisions

Approval is granted: The project may be continued in accordance with the significant change listed above.

Approval is granted with conditions: The research project may be carried out in accordance with the significant change listed above. The conditions must be fulfilled within 30 days.

Approval cannot yet be granted: The project cannot yet be carried out in accordance with the significant change listed above. The conditions must be met. The revised change will be reviewed by the Ethics Committee after submission.

Approval is not granted: The project cannot be carried out in its current form  
. It is possible to resubmit the significant change.

List of documents submitted on February 22, 2024

Dr. Julio Bielicki, University Children's Hospital Basel, Basel

| Document                                                    | Category             | Doc. date  | Version |
|-------------------------------------------------------------|----------------------|------------|---------|
| cover-letter-swiss-addendum-2024-02-22-final.pof            | Cover Letter         | 02/22/2024 |         |
| neodeco-pic-bsl-version2-0-25-January2024-French-final.paf  | 3. ICF               | 01/25/2024 | 2.0     |
| neodeco-pic-bsl-version2-0-25-January2024-English-final.pdf | 3. ICF               | 01/25/2024 | 2.0     |
| neodeco-pic-bsl-version2-0-January252024-Italian-final.pdf  | 3. ICF               | 01/25/2024 |         |
| neodeco-pic-bsl-version2-0-January252024-German-final.pdf   | 3. ICF               | 01/25/2024 |         |
| neodeco-pic-bsl-version2-0-January252024-German-tc.pdf      | 3. ICF               | 01/25/2024 |         |
| neodeco-protocol-aadenÖum-switzerland-v2-0-28-aec-2023.pdf  | 4. Stuary plan       | 12/28/2023 |         |
| cv-kerstin-jost-jan-24.pdf                                  | 6. Investigator's CV | 01/01/2024 |         |

Dr. med. Benedikt Bubl, Med. University Clinic for Pediatrics - Neonatology  
Inselspital Bern, Bern

| Document                                                     | Category             | Doc. date  | Version |
|--------------------------------------------------------------|----------------------|------------|---------|
| neodeco-pic-be-version2-0-25-january2024-german-final.pdf    | 3. ICF               | 01/25/2024 | 2.0     |
| neodeco-pic-be-version2-0-25-January2024-Italian-final.pdf   | 3. ICF               | 01/25/2024 | 2.0     |
| neodeco-pic-be-version2-0-January 25, 2024-English-final.pdf | 3. ICF               | 01/25/2024 | 2.0     |
| neodeco-pic-be-version2-0-January 25, 2024-French-final.pdf  | 3. ICF               | 01/25/2024 | 2.0     |
| neodeco-protocol-addenaum-switzerland-v2-0-28-dec-2023.pdf   | 4. Study plan        | 28/2 /2023 | 2.      |
| cv-benedikt-bubl-20240108.pal                                | 6. Investigator's CV | 08/01/2024 |         |
| neoipc-con-non-ben-bern-v1-0-20231124-signed-3-002.pdf       | 9. Agreement         | 14/12/2023 |         |

Dre Flavia Rosa Mongeret MD, MPH, Neonatology and Pediatric Intensive Care, Hôpitaux  
Universitaires de Genève, CH -1211 Geneva 14

| Document                                                    | Category         | Doc. date  | Version |
|-------------------------------------------------------------|------------------|------------|---------|
| neodeco-pic-hug-version2-0-25-January2024-English-final.pdf | 3rd ICF          | 01/25/2024 | 2.0     |
| neodeco-pic-hug-version2-0-25-January2024-French-final.pdf  | 3rd ICF          | 01/25/2024 | 2.0     |
| neodeco-pic-hug-version2-0-January25,2024-Italian-final.pdf | 3rd ICF          | 01/25/2024 | 2.0     |
| neodeco-pic-hug-version2-0-January252024-German-final.pdf   | 3rd ICF          | 01/25/2024 | 2.0     |
| neodeco-protocol-addendum-switzerland-v2-0-28-dec-2023.pdf  | 4. Study plan    | 12/28/2023 | 2.0     |
| cv-flavia-rosa-manperet-20-12-2023.pdf                      | 6. Investor's CV | 12/20/2023 |         |
| neoipc-con-neodecostudy-geneva-v 1-0-02022024-clean-1.pdf   | 9. Agreement     | 02/02      |         |

Dr. Stefanie Grabner, Eastern Switzerland Children's Hospital IPS/Neonatology, St. Gallen

| Document                                                     | Category                                                  | Doc. date  | Version |
|--------------------------------------------------------------|-----------------------------------------------------------|------------|---------|
| neodeco-pic-sg-version2-0-January 25, 2024-italian-final.pdf | 3. ICF                                                    | 01/25/2024 | 2.0     |
| neodeco-pic-sg-version2-0-January 25, 2024-english-final.pdf | 3. ICF                                                    | 01/25/2024 | 2.0     |
| neodeco-pic-sg-version2-0-25-January2024-german-final.pdf    | 3. ICF                                                    | 01/25/2024 |         |
| neodeco-pic-sg-version2-0-January252024-french-final.pdf     | 3. ICF                                                    | 25/01/2024 | 2.0     |
| neodeco-protocol-addendum-switzerland-v2-0-28-dec-2023.pdf   | 4. Study plan                                             | 25/01/2024 | 2.0     |
| cv-stefanie-grabner-20240113.pdf                             | 6. Investigator's CV                                      | 13/01/2024 |         |
| neopc-con-stgallen-v0-1-20231103-draft-002.pdf               | 8. Details on infrastructure suitability and availability | 02/22/2024 |         |

Dr. Susanne Böttger, University Hospital Zurich Clinic for Neonatology, Zurich

| Document                                                    | Category             | Doc. date  | Version |
|-------------------------------------------------------------|----------------------|------------|---------|
| neodeco-pic-uzh-version2-0-25-january2024-german-final.pdf  | 3. ICF               | 25/01/2024 | 2.0     |
| neodeco-pic-uzh-version2-0-25-january2024-italian-final.pdf | 3rd ICF              | 25/01/2024 | 2.0     |
| neodeco-pic-uzh-version2-0-25-January2024-French-final.pdf  | 3. ICF               | 01/25/2024 | 2.0     |
| neodeco-pic-uzh-version2-0-January25,2024-English-final.pdf | 3. ICF               | 01/25/2024 | 2.0     |
| neodeco-protocol-addendum-Switzerland-v2-0-28-Dec-2023.pdf  | 4. Study plan        | 28/2/2023  | 2.0     |
| cv-susanne-boettger-19-11-23.pdf                            | 6. Investigator's CV | 19/11/2023 |         |

**United Kingdom**

Birmingham Heartlands Hospital, University Hospitals Coventry and Warwickshire, St Mary's Hospital,  
Manchester, St George's Univeristy Hospitals, & Norfolk and Norwich  
University Hospital NHS Foundation Trust

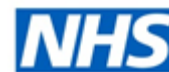

# Health Research Authority

## London - Dulwich Research Ethics Committee

Health Research Authority  
2nd Floor  
2 Redman Place  
Stratford  
London  
E20 1JO

**Please note: This is the favourable opinion of the REC only and does not allow you to start your study at NHS sites in England until you receive HRA Approval**

04 July 2024

Dr Julia Bielicki  
Reader of Infectious Disease  
St Georges University  
Institute for Infection and Immunology  
St Georges, University of London  
London  
Office 2.216F, CNPI,

Dear Dr Bielicki

**Study title:** Optimising kangaroo care to reduce neonatal severe infection/sepsis and resistant bacterial colonisation among high-risk infants in neonatal intensive care: a pragmatic, multicentre, parallel cluster randomised hybrid implementation-effectiveness trial (NeoDeco)

**REC reference:** 24/HRA/1952

**IRAS project ID:** 331038

Thank you for your letter of 20<sup>th</sup> June 2024, responding to the Proportionate Review Sub-Committee's request for changes to the documentation for the above study.

The revised documentation has been reviewed and approved on behalf of the PR sub-committee.

## Confirmation of ethical opinion

On behalf of the Research Ethics Committee (REC), I am pleased to confirm a favourable ethical opinion for the above research on the basis described in the application form, protocol and supporting documentation as revised.

## Good practice principles and responsibilities

The [UK Policy Framework for Health and Social Care Research](#) sets out principles of good practice in the management and conduct of health and social care research. It also outlines the responsibilities of individuals and organisations, including those related to the four elements of [research transparency](#):

1. [registering research studies](#)
2. [reporting results](#)
3. [informing participants](#)
4. [sharing study data and tissue](#)

## Conditions of the favourable opinion

The REC favourable opinion is subject to the following condition being met prior to the start of the study.

| Condition                                                                                                                |
|--------------------------------------------------------------------------------------------------------------------------|
| The Committee asked that the details for PALs be added to the Participant Information Sheet as they are currently blank. |

**You should notify the REC once all conditions have been met (except for site approvals from host organisations) and provide copies of any revised documentation with updated version numbers. Revised documents should be submitted to the REC electronically from IRAS. The REC will acknowledge receipt and provide a final list of the approved documentation for the study, which you can make available to host organisations to facilitate their permission for the study. Failure to provide the final versions to the REC may cause delay in obtaining permissions.**

Confirmation of Capacity and Capability (in England, Northern Ireland and Wales) or NHS management permission (in Scotland) should be sought from all NHS organisations involved in the study in accordance with NHS research governance arrangements. Each NHS organisation must confirm through the signing of agreements and/or other documents that it has given permission for the research to proceed (except where explicitly specified otherwise).

Guidance on applying for HRA and HCRW Approval (England and Wales)/ NHS permission for research is available in the Integrated Research Application System.

For non-NHS sites, site management permission should be obtained in accordance with the procedures of the relevant host organisation.

Sponsors are not required to notify the Committee of management permissions from host organisations.

## Registration of Clinical Trials

All research should be registered in a publicly accessible database and we expect all researchers, research sponsors and others to meet this fundamental best practice standard.

It is a condition of the REC favourable opinion that **all clinical trials are registered** on a public registry before the first participant is recruited and no later than six weeks after. For this purpose, 'clinical trials' are defined as:

- clinical trial of an investigational medicinal product
- clinical investigation or other study of a medical device
- combined trial of an investigational medicinal product and an investigational medical device
- other clinical trial to study a novel intervention or randomised clinical trial to compare interventions in clinical practice.

A 'public registry' means any registry on the WHO list of primary registries or the ICMJE list of registries provided the registry facilitates public access to information about the UK trial.

Failure to register a clinical trial is a breach of these approval conditions, unless a deferral has been agreed by the HRA (for more information on registration and requesting a deferral see: [Research registration and research project identifiers](#)).

Where a deferral is agreed we expect the sponsor to publish a [minimal record](#) on a publicly accessible registry. When the deferral period ends, the sponsor should publish the full record on the same registry, to fulfil the condition of the REC favourable opinion.

If you have not already included registration details in your IRAS application form you should notify the REC of the registration details as soon as possible.

## Publication of Your Research Summary

We will publish your research summary for the above study on the research summaries section of our website, together with your contact details, no earlier than three months from the date of this favourable opinion letter. Where a deferral is agreed, [a minimum research summary](#) will still be published in [the research summaries database](#). At the end of the deferral period, we will publish the [full research summary](#).

Should you wish to provide a substitute contact point, make a request to defer, or require further information, please visit: [Research summaries - Health Research Authority \(hra.nhs.uk\)](#)

**It is the responsibility of the sponsor to ensure that all the conditions are complied with before the start of the study or its initiation at a particular site (as applicable).**

## **After ethical review: Reporting requirements**

The attached document "After ethical review – guidance for researchers" gives detailed guidance on reporting requirements for studies with a favourable opinion, including:

- Notifying substantial amendments
- Adding new sites and investigators

- Notification of serious breaches of the protocol
- Progress and safety reports
- Notifying the end of the study, including early termination of the study
- Final report
- Reporting results

The latest guidance on these topics can be found at <https://www.hra.nhs.uk/approvals-amendments/managing-your-approval/>.

## Ethical review of research sites

The favourable opinion applies to all NHS/HSC sites taking part in the study, subject to management permission being obtained from the NHS/HSC R&D office prior to the start of the study (see “Conditions of the favourable opinion” above).

## Approved documents

The documents reviewed and approved by the Committee are:

| <i>Document</i>                                                                                            | <i>Version</i> | <i>Date</i>      |
|------------------------------------------------------------------------------------------------------------|----------------|------------------|
| Covering letter on headed paper [UK Cover letter ]                                                         | V1.0           | 26 April 2024    |
| Evidence of Sponsor insurance or indemnity (non NHS Sponsors only) [NeoDeco Sponsor Insurance]             |                |                  |
| IRAS Application Form [IRAS_Form_02052024]                                                                 |                | 02 May 2024      |
| Laboratory Manual [Sample Management Manual V1.0]                                                          | 1.0            | 08 March 2024    |
| Letter from funder [Funder Invitation Letter H2020]                                                        | 1.0            | 23 October 2020  |
| Other [Delegation log]                                                                                     | 1.0            | 20 March 2024    |
| Other [IRAS 331038 Provisional Outcome Response Letter ]                                                   |                |                  |
| Participant consent form [NeoDeco PIS/ICF V3.0]                                                            | 3.0            | 29 March 2024    |
| Participant information sheet (PIS) [NeoDeco PIS/ICF V3.0]                                                 | 3.0            | 29 March 2024    |
| Participant information sheet (PIS) [Bengali Translation NeoDeco PIS/ICF V3.0]                             | 3.0            | 29 March 2024    |
| Participant information sheet (PIS) [Hindi Translation NeoDeco PIS/ICF V3.0]                               | 3.0            | 29 March 2024    |
| Participant information sheet (PIS) [Urdu Translation NeoDeco PIS/ICF V3.0]                                | 3.0            | 29 March 2024    |
| Research protocol or project proposal [NeoDeco Protocol V3.0 08042024]                                     | 3.0            | 08 April 2024    |
| Summary CV for Chief Investigator (CI) [CI Dr Julia Bielicki CV]                                           | Feb2024        | 29 February 2024 |
| Summary, synopsis or diagram (flowchart) of protocol in non technical language [NeoDeco Protocol Synopsis] | 3.0            | 08 April 2024    |

## Statement of compliance

The Committee is constituted in accordance with the Governance Arrangements for Research Ethics Committees and complies fully with the Standard Operating Procedures for Research Ethics Committees in the UK.

## User Feedback

The Health Research Authority is continually striving to provide a high quality service to all applicants and sponsors. You are invited to give your view of the service you have received and the application procedure. If you wish to make your views known please use the feedback form available on the HRA website: <http://www.hra.nhs.uk/about-the-hra/governance/quality-assurance/>

## HRA Learning

We are pleased to welcome researchers and research staff to our HRA Learning Events and online learning opportunities– see details at: <https://www.hra.nhs.uk/planning-and-improving-research/learning/>

**IRAS project ID: 331038  
correspondence**

**Please quote this number on all**

With the Committee's best wishes for the success of this project.

Yours sincerely

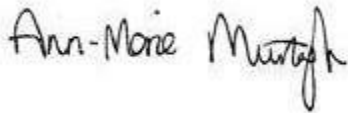

**Mrs Ann-Marie Murtagh  
Chair**

Email: [dulwich.rec@hra.nhs.uk](mailto:dulwich.rec@hra.nhs.uk)

Enclosures: "After ethical review – guidance for researchers" [\[SL-AR2\]](#)

[After ethical review guidance for sponsors and investigators –  
Non CTIMP Standard Conditions of Approval](#)

Copy to: Ms Jennifer Martin

**Greece**

University General Hospital Attikon

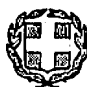

ΕΛΛΗΝΙΚΗ ΔΗΜΟΚΡΑΤΙΑ  
ΔΙΟΙΚΗΣΗ 2<sup>ης</sup> ΥΓΕΙΟΝΟΜΙΚΗΣ ΠΕΡΙΦΕΡΕΙΑΣ ΠΕΙΡΑΙΩΣ & ΑΙΓΑΙΟΥ  
ΠΑΝΕΠΙΣΤΗΜΙΑΚΟ ΓΕΝΙΚΟ ΝΟΣΟΚΟΜΕΙΟ  
«ΑΤΤΙΚΟΝ»  
ΑΠΟΣΠΑΣΜΑ ΠΡΑΚΤΙΚΩΝ  
ΕΠΙΣΤΗΜΟΝΙΚΟΥ ΣΥΜΒΟΥΛΙΟΥ  
*3ης Τακτικής Συνεδρίασης 2024*

στις 12/03/2024

ΑΠΟΦΑΣΗ

**Θέμα Β4. Αρχική κατάθεση προς έγκριση διεξαγωγής της μη παρεμβατικής Κλινικής Μελέτης με κωδικό NEODECO και τίτλο : «Βελτιστοποίηση φροντίδας τύπου «καγκουρό» για μείωση των σοβαρών περιστατικών λοιμώξεων/σηψαιμίας των νεογνών και ανθεκτικού βακτηριακού αποικισμού σε βρέφη που διατρέχουν υψηλό κίνδυνο και βρίσκονται σε μονάδα εντατικής θεραπείας νεογνών: μια πραγματιστική, πολυκεντρική, παράλληλης συστοιχίας, τυχαιοποιημένη, υβριδική μελέτη εφαρμογής-αποτελεσματικότητας (σύντομος τίτλος: NEODECO)» με χορηγό την εταιρεία Fondazione Penta ETS ( Γ' ΠΑΙΔ, ΕΒΔ 189/05-03-2024).**

Το Επιστημονικό Συμβούλιο (παρόντες: Καθηγητής, Μ. Χρυσοφός, Διευθυντής ΕΣΥ, Π. Νικολόπουλος, Επιμελητής Β' ΕΣΥ, Σ. Γιαννούτσος, ΠΕ Ακτινοφυσικών, Α. Στεφανογιάννης, Ειδικευόμενος, Ε. Μπάκας ΠΕ Νοσηλευτικής, Μ. Καλαμπαλίκη), αφού έλαβε υπόψη:

- 13) την απόφαση της 3<sup>ης</sup>(12/03/2024) (θέμα Β1) Τακτικής Συνεδρίασης της Επιτροπής Βιοηθικής Δεοντολογίας (παρόντες: Διευθυντής ΕΣΥ, Π. Νικολόπουλος, Επιμελητής Β' ΕΣΥ, Σ. Γιαννούτσος, Ειδικευόμενος, Ε. Μπάκας, ΠΕ Νοσηλευτικής, Μ. Καλαμπαλίκη).
- 14) τις διαδικασίες και τους κανονισμούς υποβολής πρωτοκόλλων για διενέργεια κλινικής δοκιμής στο Νοσοκομείο
- 15) το γεγονός ότι ο φάκελος είναι πλήρης και καλύπτει όλες τις προϋποθέσεις για τη διεξαγωγή της μελέτης
- 16) ότι από τη διενέργεια της μελέτης δεν προκύπτει οικονομική επιβάρυνση για το Νοσοκομείο

Ομοφώνως

Γνωμοδοτεί θετικά για την παραπάνω κλινική μελέτη.

Υπεύθυνοι της εν θέματι έρευνας

Διευθυντής: Καθηγήτρια, Β. ΠΑΠΑΕΥΑΓΓΕΛΟΥ

Υπεύθυνη Ερευνήτρια : Καθηγήτρια, Β. ΠΑΠΑΕΥΑΓΓΕΛΟΥ

Ο Πρόεδρος του Επιστημονικού Συμβουλίου

Καθηγητής Μ. Χρυσοφός

HELLENIC REPUBLIC

ADMINISTRATION OF THE 2nd HEALTH REGION OF PIRAEUS & AEGEAN

UNIVERSITY GENERAL HOSPITAL "ATTIKON"

EXCERPT OF MINUTES OF THE SCIENTIFIC COUNCIL

3rd Regular Meeting 2024 (March 12, 2024)

DECISION

Topic B4. Initial submission for approval to conduct the non-interventional Clinical Study with code NEODECO and title:

"Optimization of Kangaroo-type care to reduce severe cases of neonatal infections/sepsis and resistant bacterial colonization in high-risk infants admitted to neonatal intensive care units: a pragmatic, multicenter, parallel-cluster, randomized hybrid implementation-effectiveness study (short title: NEODECO)"

Sponsor: Fondazione Penta ETS (Document Ref. 189/05-03-2024).

The Scientific Council (present: Professor M. Chrysofos; Director, P. Nikolopoulos; Consultant B, S. Giannoutsos; Medical Physicist, A. Stefanogiannis; Resident, E. Bakas; Nurse, M. Kalambaliki), after considering:

- 1) Bioethics–Ethics Committee decision 12/03/2024 (Topic B1)
- 2) Procedures and regulations for clinical trial protocols
- 3) Study file completeness
- 4) No financial burden to Hospital

Unanimous positive opinion.

Principal Investigator: Professor V. Papaevangelou

Chair: Professor M. Chrysofos

**Greece**

University Hospital of Heraklion

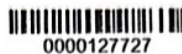

ΑΚΡΙΒΕΣ ΑΝΤΙΓΡΑΦΟ  
ΕΛΛΗΝΙΚΗ ΔΗΜΟΚΡΑΤΙΑ  
ΥΠΟΥΡΓΕΙΟ ΥΓΕΙΑΣ  
7<sup>η</sup> ΥΓΕΙΟΝΟΜΙΚΗ ΠΕΡΙΦΕΡΕΙΑ ΚΡΗΤΗΣ  
ΔΙΟΙΚΗΤΙΚΟ ΣΥΜΒΟΥΛΙΟ  
ΠΑΝΕΠΙΣΤΗΜΙΑΚΟ ΓΕΝΙΚΟ  
ΝΟΣΟΚΟΜΕΙΟ ΗΡΑΚΛΕΙΟΥ

13.03.2024 12:48:42  
ΑΚΡΙΒΕΣ  
ΑΝΤΙΓΡΑΦΟ  
ΨΗΦΙΑΚΟ  
ΥΠΟΓΡΑΦΩΜΕΝΟ  
MARK VASILAKI

ΠΡΑΚΤΙΚΟ  
ΣΥΝΕΔΡΙΑΣΗ 09/06-03-2024 Π.Η. 13/03/2024  
Α. Π.: Εισερχ. 8939 ΕΞ 2024  
Α. Π. Αποστολέα: 8939 ΕΞ 2024  
Ημ/νία Αποστολής: 13/03/2024

ΑΠΟΦΑΣΗ: 466

ΘΕΜΑ: 8<sup>ο</sup> «Έγκριση ερευνητικού πρωτοκόλλου που θα διεξαχθεί στην Νεογνολογική Κλινική του ΠαΓΝΗ»

Σχετ:

1. Η με αρ. πρωτ. 2763/24-01-2024, επιστολή της Αν. Καθηγήτριας Ε. Χατζηδάκη, η θετική εισήγηση της Ομάδας Εργασίας της Επιτροπής Ηθικής και Δεοντολογίας, καθώς και τα επισυναπτόμενα έγγραφα.
2. Η με αρ. πρωτ. 2763/05-02-2024 επιστολή του Επιστημονικού Συμβουλίου.
3. Η με αρ. πρωτ. 2763/05-02-2024 εισήγηση του Διευθυντή Ιατρικής Υπηρεσίας Καθηγητή Παναγιώτη Μήτσια.

Το Δ.Σ. ύστερα από τη με αρ. πρωτ. 2763/05-02-2024 εισήγηση του Διευθυντή Ιατρικής Υπηρεσίας Καθηγητή Παναγιώτη Μήτσια και αφού έλαβε υπόψη του τα παραπάνω σχετικά,

**ομόφωνα αποφασίζει**

Την έγκριση του ερευνητικού πρωτοκόλλου με τίτλο «Infection Surveillance for Neonatology (NeolPC) και κωδικό (NeolPC) που θα διεξαχθεί στην Νεογνολογική Κλινική του Νοσοκομείου μας.

Η Γραμματεία της Ιατρικής Υπηρεσίας του Πα.Γ.Ν.Η να κάνει τις απαραίτητες ενέργειες.

**Ο ΠΡΟΕΔΡΟΣ**

**Ο ΑΝΤΙΠΡΟΕΔΡΟΣ**

**ΤΑ ΜΕΛΗ**

ΧΑΛΚΙΑΔΑΚΗΣ ΓΕΩΡΓΙΟΣ

ΚΤΕΝΙΑΔΑΚΗΣ ΣΤΥΛΙΑΝΟΣ

ΒΕΛΕΓΡΑΚΗ ΙΦΙΓΕΝΕΙΑ

Η ΓΡΑΜΜΑΤΕΑΣ ΔΣ

ΑΝΤΩΝΙΟΥ ΑΙΚΑΤΕΡΙΝΗ

ΤΖΙΟΒΑΡΑΣ ΚΩΝΣΤΑΝΤΙΝΟΣ

ΒΑΣΙΛΑΚΗ ΜΑΡΙΑ

ΑΚΡΙΒΕΣ ΑΠΟΣΠΑΣΜΑ

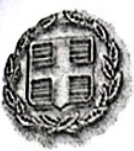

ΕΠΙΣΤΗΜΟΝΙΚΟ  
ΣΥΜΒΟΥΛΙΟ

Ηράκλειο 05/02/2024  
Αρ. πρωτ.: 2763

ΠΡΟΕΔΡΟΣ  
Τσιλιμπάρης  
Μιλτιάδης  
Καθηγητής  
Δ/ντής Οφθαλμολογικής  
Κλινικής

ΠΡΟΣ: Δ/ντή Ιατρικής Υπηρεσίας  
Καθηγητή κ. Π. Μήτσια

ΤΑΚΤΙΚΑ ΜΕΛΗ  
Μιχαηλίδη Ελένη  
Δ/ντρια ΕΣΥ  
Παιδιατρικής

Κοιν: -Διοικητή Πα.ΓΝΗ  
-Αναπλ. Καθηγήτρια κα. Ε. Χατζηδάκη  
-Δ/ντρια ΕΣΥ κα. Ν.-Χ. Αναγνωστάτου

Αλεξοπούλου  
Χριστίνα  
Δ/ντρια ΕΣΥ  
Πνευμονολογίας-  
Φυματιολογίας

**ΘΕΜΑ:** «Έγκριση ερευνητικού πρωτοκόλλου που θα διεξαχθεί στην  
Νεογνολογική Κλινική του ΠαΓΝΗ»

Κουτρουλάκης  
Δημήτριος  
Επιμελητής Α' Μ/Γ

Το Ε.Σ στη συνεδρίασή του, της 05/02/2024, αφού έλαβε υπόψη την επιστολή της Αναπλ. Καθηγήτριας κα. Ε. Χατζηδάκη, με αρ. πρωτ. 2763/24-01-2024, τη θετική εισήγηση της Ομάδας Εργασίας της Επιτροπής Ηθικής και Δεοντολογίας, καθώς και τα επισυναπτόμενα έγγραφα, εισηγείται θετικά στο Δ.Σ την έγκριση του ερευνητικού πρωτοκόλλου με τίτλο «Infection Surveillance for Neonatology(NeoIPC)» και κωδικό «NeoIPC» που θα διεξαχθεί στην Νεογνολογική Κλινική του Νοσοκομείου μας στα πλαίσια.

Παπαδοκωστάκη  
Ελένη  
Επιμελήτρια Β'  
Εσ. Παθολογίας

Βενουάκη Μαρία  
Αν. Καθηγήτρια  
Κλινικής Χημείας

Η εισήγηση του Ε.Σ. δεν επέχει σε καμία περίπτωση ισχύ απόφασης και δεν δύναται να χρησιμοποιηθεί ως τέτοια.

Καλιαφεντάκη  
Βασιλεία  
Ειδικευόμενη  
Αιματολογίας

Ανυφαντάκη Στυλιανή  
Τομέαρχης  
Νοσηλευτικής

Για το Επιστημονικό Συμβούλιο

Ταμπακάκη Μαρία  
ΤΕ Φυσικοθεραπείας

Καθηγητής Μιλτιάδης Τσιλιμπάρης

Γραμματεία  
Μαρία Μπενέτου  
Τηλ.: 2813405316

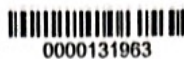

0000131963

09.04.2024 10:49:53

AKRIBES ANTIΓΡΑΦΟ  
ΥΠΟΥΡΓΕΙΟ ΥΓΕΙΑΣ  
ΥΠΟΓΕΙΟ ΓΡΑΦΕΙΟ  
ΜΕΛΗΤΗΡΑΣ

AKRIBES ANTIΓΡΑΦΟ  
ΕΛΛΗΝΙΚΗ ΔΗΜΟΚΡΑΤΙΑ  
ΥΠΟΥΡΓΕΙΟ ΥΓΕΙΑΣ  
7<sup>η</sup> ΥΓΕΙΟΝΟΜΙΚΗ ΠΕΡΙΦΕΡΕΙΑ ΚΡΗΤΗΣ  
ΔΙΟΙΚΗΤΙΚΟ ΣΥΜΒΟΥΛΙΟ  
ΠΑΝΕΠΙΣΤΗΜΙΑΚΟ ΓΕΝΙΚΟ  
ΝΟΣΟΚΟΜΕΙΟ ΗΡΑΚΛΕΙΟΥ

ΠΡΑΚΤΙΚΟ  
ΣΥΝΕΔΡΙΑΣΗ 12/03-04/2024 Π.Η. 09/04/2024  
Α. Π.: Εισερχ. 11696 ΕΞ 2024  
Α. Π. Αποστολέα: 11696 ΕΞ 2024  
Ημ/νία Αποστολής: 09/04/2024

ΑΠΟΦΑΣΗ:641

ΘΕΜΑ:14<sup>ο</sup> «Έγκριση ερευνητικού πρωτοκόλλου που θα διεξαχθεί στην Νεογνολογική Κλινική του ΠαΓΝΗ»

Σχετ:

1. Η με αρ. πρωτ 7440/29-02-2024 επιστολή της Αναπλ. Καθηγήτριας Ε. Χατζηδάκη, η θετική εισήγηση της Ομάδας Εργασίας της Επιτροπής Ηθικής και Δεοντολογίας, καθώς και τα επισυναπτόμενα έγγραφα
2. Η με αρ. πρωτ 7440/04-03-2024 επιστολή του Επιστημονικού Συμβουλίου.
3. Η με αρ. πρωτ 7440/04-03-2024 εισήγηση του Διευθυντή Ιατρικής Υπηρεσίας Καθηγητή Παναγιώτη Μήτσια

Το Δ.Σ. αφού έλαβε υπόψη του τα παραπάνω σχετικά,  
ομόφωνα αποφασίζει

Την έγκριση του ερευνητικού πρωτοκόλλου με τίτλο «Βελτιστοποίηση φροντίδας τύπου «καγκουρό» για μείωση των σοβαρών περιστατικών λοιμώξεων/σηψαιμίας των νεογνών και ανθεκτικού βακτηριακού αποικισμού σε βρέφη που διατρέχουν υψηλό κίνδυνο και βρίσκονται σε μονάδα εντατικής θεραπείας νεογνών: μια πραγματιστική, πολυκεντρική, παράλληλης συστοιχίας, τυχαιοποιημένη,υβριδική μελέτη εφαρμογής-αποτελεσματικότητας (NeoDeco)---  
Optimising kangaroo care to reduce neonatal severe infection/sepsis and resistant bacterial colonization among high-risk infants in neonatal intensive care: a pragmatic, multicentre, parallel cluster randomised hybrid implementation-effectiveness study» και κωδικό «NeoDeco» που θα διεξαχθεί στην Νεογνολογική Κλινική του Νοσοκομείου μας στα πλαίσια.

Η Γραμματεία της Ιατρικής Υπηρεσίας του Πα.Γ.Ν.Η να κάνει τις απαραίτητες ενέργειες.

Ο ΠΡΟΕΔΡΟΣ

Ο ΑΝΤΙΠΡΟΕΔΡΟΣ

ΤΑ ΜΕΛΗ

ΧΑΛΚΙΑΔΑΚΗΣ ΓΕΩΡΓΙΟΣ

ΚΤΕΝΙΑΔΑΚΗΣ ΣΤΥΛΙΑΝΟΣ

ΒΕΛΕΓΡΑΚΗ ΙΦΙΓΕΝΕΙΑ

Η ΓΡΑΜΜΑΤΕΑΣ ΔΣ

ΠΑΤΡΙΑΝΑΚΟΣ ΑΛΕΞΑΝΔΡΟΣ

ΤΖΙΟΒΑΡΑΣ ΚΩΝΣΤΑΝΤΙΝΟΣ

ΒΑΣΙΛΑΚΗ ΜΑΡΙΑ

AKRIBES ΑΠΟΣΠΑΣΜΑ

ΣΠΥΡΙΔΑΚΗ ΕΥΤΥΧΙΑ ΑΛΕΞΑΝΔΡΑ

ΣΟΥΡΒΙΝΟΣ ΓΕΩΡΓΙΟΣ

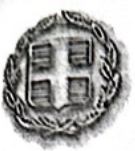

ΕΠΙΣΤΗΜΟΝΙΚΟ  
ΣΥΜΒΟΥΛΙΟ

Ηράκλειο 04/03/2024  
Αρ. πρωτ.: 7440

ΠΡΟΕΔΡΟΣ  
Τσιλιμπάρης  
Μιλτιάδης  
Καθηγητής  
Δ/ντής Οφθαλμολογικής  
Κλινικής

ΤΑΚΤΙΚΑ ΜΕΛΗ  
Μιχαηλίδη Ελένη  
Δ/ντρια ΕΣΥ  
Παιδιατρικής

Αλεξοπούλου  
Χριστίνα  
Δ/ντρια ΕΣΥ  
Πνευμονολογίας-  
Φυματιολογίας

Κουτρουλάκης  
Δημήτριος  
Επιμελητής Α' Μ/Γ

Παπαδοκωστάκη  
Ελένη  
Επιμελήτρια Β'  
Εσ. Παθολογίας

Βενουδάκη Μαρία  
Αν. Καθηγήτρια  
Κλινικής Χημείας

Καλιαφεντάκη  
Βασιλεία  
Ειδικευόμενη  
Αιματολογίας

Ανυφαντάκη Στυλιανή  
Τομέαρχης  
Νοσηλευτικής

Ταμπακάκη Μαρία  
ΤΕ Φυσικοθεραπείας

Γραμματεία  
Μαρία Μπενέτου  
Τηλ.: 2813405316

ΠΡΟΣ: Δ/ντή Ιατρικής Υπηρεσίας  
Καθηγητή κ. Π. Μήτσια

Κοιν: -Διοικητή Πα.ΓΝΗ  
-Αναπλ. Καθηγήτρια κα. Ε. Χατζηδάκη  
-Δ/ντρια ΕΣΥ κα. Ν.-Χ. Αναγνωστάτου

ΘΕΜΑ: «Έγκριση ερευνητικού πρωτοκόλλου που θα διεξαχθεί στην  
Νεογνολογική Κλινική του ΠαΓΝΗ»

Το Ε.Σ στη συνεδρίασή του, της 04/03/2024, αφού έλαβε υπόψη την επιστολή της Αναπλ. Καθηγήτριας κα. Ε. Χατζηδάκη, με αρ. πρωτ. 7440/29-02-2024, τη θετική εισήγηση της Ομάδας Εργασίας της Επιτροπής Ηθικής και Δεοντολογίας, καθώς και τα επισυναπτόμενα έγγραφα, εισηγείται θετικά στο Δ.Σ την έγκριση του ερευνητικού πρωτοκόλλου με τίτλο «Βελτιστοποίηση φροντίδας τύπου «καγκουρό» για μείωση των σοβαρών περιστατικών λοιμώξεων/σηψαιμίας των νεογνών και ανθεκτικού βακτηριακού αποικισμού σε βρέφη που διατρέχουν υψηλό κίνδυνο και βρίσκονται σε μονάδα εντατικής θεραπείας νεογνών: μια πραγματιστική, πολυκεντρική, παράλληλης συστοιχίας, τυχαιοποιημένη, υβριδική μελέτη εφαρμογής-αποτελεσματικότητας (NeoDeco)--- Optimising kangaroo care to reduce neonatal severe infection/sepsis and resistant bacterial colonization among high-risk infants in neonatal intensive care: a pragmatic, multicentre, parallel cluster randomised hybrid implementation-effectiveness study» και κωδικό «NeoDeco» που θα διεξαχθεί στην Νεογνολογική Κλινική του Νοσοκομείου μας στα πλαίσια.

Η εισήγηση του Ε.Σ. δεν επέχει σε καμία περίπτωση ισχύ απόφασης και δεν δύναται να χρησιμοποιηθεί ως τέτοια.

Για το Επιστημονικό Συμβούλιο  
Καθηγητής Μιλτιάδης Τσιλιμπάρης

HELLENIC REPUBLIC – MINISTRY OF HEALTH

7th Health Region of Crete

UNIVERSITY GENERAL HOSPITAL OF HERAKLION

OFFICIAL EXCERPT OF MINUTES

DECISION 466 – BOARD MEETING 09/06-03-2024 (Issued: 13/03/2024)

Subject: Approval of research protocol to be conducted in the Neonatology Clinic of the University General Hospital of Heraklion (Pa.G.N.H.)

The Board, after reviewing:

1. Document 2763/24-01-2024 submitted by Associate Professor E. Chatzidaki, including the positive recommendation of the Ethics & Bioethics Committee and all attached files.citeturn14search1
2. Document 2763/05-02-2024 of the Scientific Council.citeturn14search1
3. Document 2763/05-02-2024 submitted by the Director of Medical Services, Professor Panagiotis Mitsias.citeturn14search1

UNANIMOUS DECISION:

Approval of the research protocol titled “Infection Surveillance for Neonatology (NeoIPC)” to be conducted in the Neonatology Clinic of the Hospital.citeturn14search1

---

DECISION 641 – BOARD MEETING 12/03-04-2024 (Issued: 09/04/2024)

Subject: Approval of research protocol to be conducted in the Neonatology Clinic of Pa.G.N.H.

Reviewed:

1. Document 7440/29-02-2024 from Associate Professor E. Chatzidaki with the positive ethical recommendation.citeturn14search1
2. Document 7440/04-03-2024 of the Scientific Council.citeturn14search1
3. Document 7440/04-03-2024 of the Director of Medical Services, Professor Panagiotis Mitsias.citeturn14search1

UNANIMOUS DECISION:

Approval of the research protocol titled:

“Optimising kangaroo care to reduce neonatal severe infection/sepsis and resistant bacterial colonisation among high-risk infants in neonatal intensive care units: a pragmatic, multicentre, parallel-cluster randomised hybrid implementation-effectiveness study (NeoDeco).”citeturn14search1 to be conducted in the Neonatology Clinic of the University General Hospital of Heraklion.

---

SCIENTIFIC COUNCIL RECOMMENDATIONS (05/02/2024 & 04/03/2024)

The Scientific Council reviewed all submitted documentation from Associate Professor E. Chatzidaki and the Ethics Committee and recommends approval of the following:citeturn14search1

- Infection Surveillance for Neonatology (NeoIPC)
- NeoDeco Protocol – “Optimising kangaroo care...”

Signed:

President: Professor Miltiadis Tsilibaris

Board President: Georgios Chalkiadakis

Vice-President: Stylianos Kteniadakos

Members: Ifigeneia Velegraki, Aikaterini Antoniou, Konstantinos Tziovaras, Alexandros Patriannakos, Eutychia-Alexandra Spyridaki, Georgios Sourvinos

Secretary: Maria Vasilaki

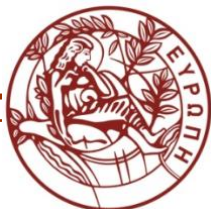

ΕΛΛΗΝΙΚΗ ΔΗΜΟΚΡΑΤΙΑ  
ΠΑΝΕΠΙΣΤΗΜΙΟ ΚΡΗΤΗΣ

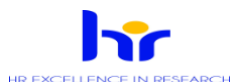

ΕΠΙΤΡΟΠΗ ΗΘΙΚΗΣ ΚΑΙ ΔΕΟΝΤΟΛΟΓΙΑΣ  
ΤΗΣ ΕΡΕΥΝΑΣ (Ε.Η.Δ.Ε)

**ΑΠΟΦΑΣΗ**  
**ΕΠΙΤΡΟΠΗΣ ΗΘΙΚΗΣ ΚΑΙ**  
**ΔΕΟΝΤΟΛΟΓΙΑΣ ΤΗΣ ΕΡΕΥΝΑΣ (Ε.Η.Δ.Ε.)**  
**ΤΟΥ ΠΑΝΕΠΙΣΤΗΜΙΟΥ ΚΡΗΤΗΣ**  
**ΓΙΑ**  
**ΕΓΚΡΙΣΗ**  
**ΕΡΕΥΝΗΤΙΚΟΥ ΠΡΩΤΟΚΟΛΛΟΥ**

**ΕΜΠΙΣΤΕΥΤΙΚΟ ΕΓΓΡΑΦΟ**

|                                                                                                                                                                                                                                                                                                                                                                                                                                                                                                                                                                                                                                                                                                                                                                                                                                                                                                                                                                                                                                                                                                                             |         |                       |                                                                                                          |
|-----------------------------------------------------------------------------------------------------------------------------------------------------------------------------------------------------------------------------------------------------------------------------------------------------------------------------------------------------------------------------------------------------------------------------------------------------------------------------------------------------------------------------------------------------------------------------------------------------------------------------------------------------------------------------------------------------------------------------------------------------------------------------------------------------------------------------------------------------------------------------------------------------------------------------------------------------------------------------------------------------------------------------------------------------------------------------------------------------------------------------|---------|-----------------------|----------------------------------------------------------------------------------------------------------|
| Τίτλος μελέτης για την οποία ζητήθηκε έγκριση                                                                                                                                                                                                                                                                                                                                                                                                                                                                                                                                                                                                                                                                                                                                                                                                                                                                                                                                                                                                                                                                               |         |                       |                                                                                                          |
| <b>Optimising kangaroo care to reduce neonatal severe infection/sepsis and resistant bacterial colonisation among high-risk infants in neonatal intensive care: a pragmatic, multicentre, parallel cluster randomised hybrid implementation-effectiveness study. (NeoDeco) / Βελτιστοποίηση φροντίδας τύπου «καγκουρό» για μείωση των σοβαρών περιστατικών λοιμώξεων/σηψαιμίας των νεογνών και ανθεκτικού βακτηριακού αποικισμού σε βρέφη που διατρέχουν υψηλό κίνδυνο και βρίσκονται σε μονάδα εντατικής θεραπείας νεογνών: μια πραγματιστική, πολυκεντρική, παράλληλης συστοιχίας, τυχαιοποιημένη, υβριδική μελέτη φαρμογής- αποτελεσματικότητας</b>                                                                                                                                                                                                                                                                                                                                                                                                                                                                      |         |                       |                                                                                                          |
| Επιστημονικός Υπεύθυνος της μελέτης                                                                                                                                                                                                                                                                                                                                                                                                                                                                                                                                                                                                                                                                                                                                                                                                                                                                                                                                                                                                                                                                                         |         |                       |                                                                                                          |
| <b>Ελευθερία Χατζηδάκη</b> , Αναπληρώτρια Καθηγήτρια Νεογνολογίας Ιατρικής Σχολής Πανεπιστημίου Κρήτης                                                                                                                                                                                                                                                                                                                                                                                                                                                                                                                                                                                                                                                                                                                                                                                                                                                                                                                                                                                                                      |         |                       |                                                                                                          |
| Είδος προτεινομένης μελέτης                                                                                                                                                                                                                                                                                                                                                                                                                                                                                                                                                                                                                                                                                                                                                                                                                                                                                                                                                                                                                                                                                                 |         |                       |                                                                                                          |
| <b>Κλινική πολυκεντρική</b>                                                                                                                                                                                                                                                                                                                                                                                                                                                                                                                                                                                                                                                                                                                                                                                                                                                                                                                                                                                                                                                                                                 |         |                       |                                                                                                          |
| Αριθμός Πρωτοκόλλου Επιτροπής Ηθικής και Δεοντολογίας της Έρευνας (Ε.Η.Δ.Ε.)                                                                                                                                                                                                                                                                                                                                                                                                                                                                                                                                                                                                                                                                                                                                                                                                                                                                                                                                                                                                                                                |         |                       |                                                                                                          |
| <b>57/06.03.2024 (αρχική υποβολή)</b>                                                                                                                                                                                                                                                                                                                                                                                                                                                                                                                                                                                                                                                                                                                                                                                                                                                                                                                                                                                                                                                                                       |         |                       |                                                                                                          |
| Αριθμός& Ημερομηνία Απόφασης Επιτροπής Ηθικής και Δεοντολογίας της Έρευνας (Ε.Η.Δ.Ε.)                                                                                                                                                                                                                                                                                                                                                                                                                                                                                                                                                                                                                                                                                                                                                                                                                                                                                                                                                                                                                                       |         |                       |                                                                                                          |
| <b>5713.03.2024</b> (με ηλεκτρονική διαβούλευση)                                                                                                                                                                                                                                                                                                                                                                                                                                                                                                                                                                                                                                                                                                                                                                                                                                                                                                                                                                                                                                                                            |         |                       |                                                                                                          |
| Απόφαση Επιτροπής Ηθικής και Δεοντολογίας της Έρευνας (Ε.Η.Δ.Ε.)                                                                                                                                                                                                                                                                                                                                                                                                                                                                                                                                                                                                                                                                                                                                                                                                                                                                                                                                                                                                                                                            |         |                       |                                                                                                          |
| <b>Εγκρίνεται</b>                                                                                                                                                                                                                                                                                                                                                                                                                                                                                                                                                                                                                                                                                                                                                                                                                                                                                                                                                                                                                                                                                                           |         |                       |                                                                                                          |
| Μέλη της Επιτροπής                                                                                                                                                                                                                                                                                                                                                                                                                                                                                                                                                                                                                                                                                                                                                                                                                                                                                                                                                                                                                                                                                                          |         |                       |                                                                                                          |
| <b>Ιωάννης Δαλέζιος</b> , Πρόεδρος, Τακτικό Μέλος<br><b>Παναγιώτης Μιχαηλίδης</b> , Τακτικό Μέλος<br><b>Βασιλική Πετούση</b> , Τακτικό Μέλος<br><b>Παρασκευή Τσακάλη</b> , Τακτικό Μέλος<br><b>Ιωάννα Τσιλιγιάννη</b> , Τακτικό Μέλος<br><b>Ειρήνη Κυριακάκη</b> , Τακτικό Εξωτερικό Μέλος<br><b>Νικόλαος Κωστομητσόπουλος</b> , Τακτικό Εξωτερικό Μέλος                                                                                                                                                                                                                                                                                                                                                                                                                                                                                                                                                                                                                                                                                                                                                                    |         |                       |                                                                                                          |
| Σχόλια από την Επιτροπή Ηθικής και Δεοντολογίας της Έρευνας (Ε.Η.Δ.Ε.) με βάση τα οποία λήφθηκε η απόφαση για την αίτηση που υποβλήθηκε                                                                                                                                                                                                                                                                                                                                                                                                                                                                                                                                                                                                                                                                                                                                                                                                                                                                                                                                                                                     |         |                       |                                                                                                          |
| <p>Μελετώντας το ερευνητικό πρωτόκολλο και όλα τα σχετικά δικαιολογητικά/πρόσθετες εγκρίσεις, όπως κατατέθηκαν στην Επιτροπή Ηθικής και Δεοντολογίας της Έρευνας (Ε.Η.Δ.Ε.) και λαμβάνοντας υπόψη τους σκοπούς και τα αναμενόμενα οφέλη, τη μεθοδολογία της έρευνας, την απουσία ταπεινών κινήτρων συμμετοχής, την έλλειψη σύγκρουσης συμφερόντων από τους ερευνητές και την έλλειψη πιθανών κινδύνων για τα υποκείμενα της έρευνας,</p> <p style="text-align: center;"><b>η Ε.Η.Δ.Ε.</b></p> <p>αποφασίζει ομόφωνα, σύμφωνα με τον Ν. 4957/2022 άρθρα 277-282, σχετικά με την υποβληθείσα αίτηση με αρ. πρωτ. 57/06.03.2024, ότι <b>εγκρίνει την εκτέλεση του εν λόγω ερευνητικού έργου</b>, καθώς προκύπτει ότι πληρούνται οι εκ του άμεσα εφαρμοστέου δικαίου και της ηθικής και δεοντολογίας όροι και προϋποθέσεις.</p> <p><b>Η παρούσα απόφαση της Ε.Η.Δ.Ε. σε καμία περίπτωση ΔΕΝ υποκαθιστά την απαιτούμενη από άλλη αρμόδια δημόσια υπηρεσία, διοικητικό όργανο ή ανεξάρτητη διοικητική Αρχή, έγκριση ή αδειοδότηση του παρόντος ερευνητικού έργου/ μελέτης που δύναται επιπλέον να απαιτείται εκ του νόμου</b></p> |         |                       |                                                                                                          |
| Ημερομηνία έκδοσης απόφασης                                                                                                                                                                                                                                                                                                                                                                                                                                                                                                                                                                                                                                                                                                                                                                                                                                                                                                                                                                                                                                                                                                 |         |                       |                                                                                                          |
| Έτος: <b>2024</b>                                                                                                                                                                                                                                                                                                                                                                                                                                                                                                                                                                                                                                                                                                                                                                                                                                                                                                                                                                                                                                                                                                           |         | Μήνας: <b>Μάρτιος</b> | Ημέρα: <b>Δέκατη τρίτη (13<sup>η</sup>), Τετάρτη</b>                                                     |
| Υπογράφει ο Πρόεδρος της Επιτροπής                                                                                                                                                                                                                                                                                                                                                                                                                                                                                                                                                                                                                                                                                                                                                                                                                                                                                                                                                                                                                                                                                          |         |                       |                                                                                                          |
| Θέση                                                                                                                                                                                                                                                                                                                                                                                                                                                                                                                                                                                                                                                                                                                                                                                                                                                                                                                                                                                                                                                                                                                        | Όνομα   | Επώνυμο               | Υπογραφή                                                                                                 |
| Αναπληρωτής Καθηγητής                                                                                                                                                                                                                                                                                                                                                                                                                                                                                                                                                                                                                                                                                                                                                                                                                                                                                                                                                                                                                                                                                                       | Ιωάννης | Δαλέζιος              | <br>Απόφαση ΕΗΔΕ 57 |

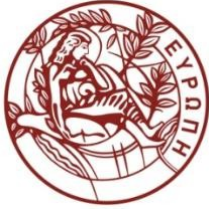

HELLENIC REPUBLIC  
UNIVERSITY OF CRETE

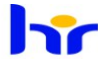

HR EXCELLENCE IN RESEARCH

COMMITTEE ON RESEARCH ETHICS AND  
DEONTOLOGY (E.H.D.E)

**DECISION**

**COMMITTEE ON ETHICS AND  
ETHICS AND DEONTOLOGY OF RESEARCH  
(E.H.D.E.) OF THE UNIVERSITY OF CRETE**

**FOR  
APPROV  
AL  
OF RESEARCH PROTOCOL**

**CONFIDENTIAL DOCUMENT**

|                                                                                                                                                                                                                                                                                                                                                                                                                                                                                                                                                                                                                                                                                                                                                                                                                                                                                                                                                                                                                                                                                                                                                                                                                                                 |         |                                                     |                                                                                                                                                         |
|-------------------------------------------------------------------------------------------------------------------------------------------------------------------------------------------------------------------------------------------------------------------------------------------------------------------------------------------------------------------------------------------------------------------------------------------------------------------------------------------------------------------------------------------------------------------------------------------------------------------------------------------------------------------------------------------------------------------------------------------------------------------------------------------------------------------------------------------------------------------------------------------------------------------------------------------------------------------------------------------------------------------------------------------------------------------------------------------------------------------------------------------------------------------------------------------------------------------------------------------------|---------|-----------------------------------------------------|---------------------------------------------------------------------------------------------------------------------------------------------------------|
| Title of study for which approval was requested                                                                                                                                                                                                                                                                                                                                                                                                                                                                                                                                                                                                                                                                                                                                                                                                                                                                                                                                                                                                                                                                                                                                                                                                 |         |                                                     |                                                                                                                                                         |
| <b>Optimising kangaroo care to reduce neonatal severe infection/sepsis and resistant bacterial colonisation among high-risk infants in neonatal intensive care: a pragmatic, multicentre, parallel cluster randomised hybrid implementation-effectiveness study. (NeoDeco) / Optimising kangaroo care to reduce severe infections/sepsis and resistant bacterial colonisation among high-risk infants in neonatal intensive care: a pragmatic, multicentre, parallel cluster randomised hybrid implementation-effectiveness study. to reduce severe infection/sepsis AND resistant bacterial colonisation among high-risk infants in neonatal intensive care: a pragmatic, multicenter, parallel cluster, randomized, hybrid implementation-effectiveness study application-effectiveness</b>                                                                                                                                                                                                                                                                                                                                                                                                                                                   |         |                                                     |                                                                                                                                                         |
| Scientific Director of the study                                                                                                                                                                                                                                                                                                                                                                                                                                                                                                                                                                                                                                                                                                                                                                                                                                                                                                                                                                                                                                                                                                                                                                                                                |         |                                                     |                                                                                                                                                         |
| <b>Eleftheria Chatzidakis</b> , Associate Professor of Neonatology, Medical School, University of Crete                                                                                                                                                                                                                                                                                                                                                                                                                                                                                                                                                                                                                                                                                                                                                                                                                                                                                                                                                                                                                                                                                                                                         |         |                                                     |                                                                                                                                                         |
| Type of proposed study                                                                                                                                                                                                                                                                                                                                                                                                                                                                                                                                                                                                                                                                                                                                                                                                                                                                                                                                                                                                                                                                                                                                                                                                                          |         |                                                     |                                                                                                                                                         |
| <b>Multicenter clinical</b>                                                                                                                                                                                                                                                                                                                                                                                                                                                                                                                                                                                                                                                                                                                                                                                                                                                                                                                                                                                                                                                                                                                                                                                                                     |         |                                                     |                                                                                                                                                         |
| Protocol Number of the Research Ethics and Conduct Committee (E.H.D.E.)                                                                                                                                                                                                                                                                                                                                                                                                                                                                                                                                                                                                                                                                                                                                                                                                                                                                                                                                                                                                                                                                                                                                                                         |         |                                                     |                                                                                                                                                         |
| <b>57/06.03.2024 (initial submission)</b>                                                                                                                                                                                                                                                                                                                                                                                                                                                                                                                                                                                                                                                                                                                                                                                                                                                                                                                                                                                                                                                                                                                                                                                                       |         |                                                     |                                                                                                                                                         |
| Number & Date of Decision of the Research Ethics and Conduct Committee (E.H.D.E.)                                                                                                                                                                                                                                                                                                                                                                                                                                                                                                                                                                                                                                                                                                                                                                                                                                                                                                                                                                                                                                                                                                                                                               |         |                                                     |                                                                                                                                                         |
| <b>5713.03.2024 (with electronic consultation)</b>                                                                                                                                                                                                                                                                                                                                                                                                                                                                                                                                                                                                                                                                                                                                                                                                                                                                                                                                                                                                                                                                                                                                                                                              |         |                                                     |                                                                                                                                                         |
| Decision of the Research Ethics and Conduct Committee (E.H.D.E.)                                                                                                                                                                                                                                                                                                                                                                                                                                                                                                                                                                                                                                                                                                                                                                                                                                                                                                                                                                                                                                                                                                                                                                                |         |                                                     |                                                                                                                                                         |
| <b>APPROVED</b>                                                                                                                                                                                                                                                                                                                                                                                                                                                                                                                                                                                                                                                                                                                                                                                                                                                                                                                                                                                                                                                                                                                                                                                                                                 |         |                                                     |                                                                                                                                                         |
| Members of the Committee                                                                                                                                                                                                                                                                                                                                                                                                                                                                                                                                                                                                                                                                                                                                                                                                                                                                                                                                                                                                                                                                                                                                                                                                                        |         |                                                     |                                                                                                                                                         |
| <b>Ioannis Dalezios</b> , Chair, Full Member <b>Panagiotis Michailidis</b> , Full Member <b>Vasiliki Petousi</b> , Full Member <b>Paraskevi Tsakali</b> , Full Member <b>Ioanna Tsiligianni</b> , Regular Member <b>Eirini Kyriakaki</b> , Regular External Member <b>Nikolaos Kostomitsopoulos</b> , Regular External Member                                                                                                                                                                                                                                                                                                                                                                                                                                                                                                                                                                                                                                                                                                                                                                                                                                                                                                                   |         |                                                     |                                                                                                                                                         |
| Comments from the Research Ethics and Conduct Committee (E.H.D.E.) on the basis of which the decision on the application submitted                                                                                                                                                                                                                                                                                                                                                                                                                                                                                                                                                                                                                                                                                                                                                                                                                                                                                                                                                                                                                                                                                                              |         |                                                     |                                                                                                                                                         |
| <p>Having examined the research protocol and all relevant supporting documents/additional approvals, as submitted to the Research Ethics and Conduct Committee (E.H.D.E.)</p> <p style="text-align: center;">and</p> <p>taking into account the purposes and expected benefits, the research methodology, the absence of ulterior motives for participation, the lack of conflict of interest on the part of the researchers, and the absence of potential risks to research subjects,</p> <p style="text-align: center;"><b>the E.H.D.E.</b></p> <p><i>decides unanimously, in accordance with Law 4957/2022, Articles 277-282, regarding the submitted application with ref. no. 57/06.03.2024, to <b>approve the execution of the research project in question</b>, as it appears that the terms and conditions of directly applicable law and ethics and professional conduct are met.</i></p> <p><b><i>This decision by the E.H.D.E. does NOT in any way replace the approval or licensing of this research project/study required by another competent public service, administrative body, or independent administrative authority, approval or licensing of this research project/study, which may also be required by law.</i></b></p> |         |                                                     |                                                                                                                                                         |
| Date of decision                                                                                                                                                                                                                                                                                                                                                                                                                                                                                                                                                                                                                                                                                                                                                                                                                                                                                                                                                                                                                                                                                                                                                                                                                                |         |                                                     |                                                                                                                                                         |
| Year: <b>2024</b>                                                                                                                                                                                                                                                                                                                                                                                                                                                                                                                                                                                                                                                                                                                                                                                                                                                                                                                                                                                                                                                                                                                                                                                                                               |         | Month: <b>March</b>                                 |                                                                                                                                                         |
|                                                                                                                                                                                                                                                                                                                                                                                                                                                                                                                                                                                                                                                                                                                                                                                                                                                                                                                                                                                                                                                                                                                                                                                                                                                 |         | Day: <b>Thirteenth (13<sup>th</sup>), Wednesday</b> |                                                                                                                                                         |
| Signed by the Chairman of the Committee                                                                                                                                                                                                                                                                                                                                                                                                                                                                                                                                                                                                                                                                                                                                                                                                                                                                                                                                                                                                                                                                                                                                                                                                         |         |                                                     |                                                                                                                                                         |
| Position                                                                                                                                                                                                                                                                                                                                                                                                                                                                                                                                                                                                                                                                                                                                                                                                                                                                                                                                                                                                                                                                                                                                                                                                                                        | First   | Surname                                             | Signature                                                                                                                                               |
| Associate Professor                                                                                                                                                                                                                                                                                                                                                                                                                                                                                                                                                                                                                                                                                                                                                                                                                                                                                                                                                                                                                                                                                                                                                                                                                             | Ioannis | Dalezios                                            | <br><b>OANNIS DALEZIOS</b><br>13/03/2024 13:36<br>EIDE Decision 57 |

**Greece**

Ioannina University Hospital

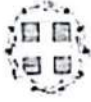

ΕΛΛΗΝΙΚΗ ΔΗΜΟΚΡΑΤΙΑ  
ΥΠΟΥΡΓΕΙΟ ΥΓΕΙΑΣ  
6<sup>η</sup> ΥΓΕΙΟΝΟΜΙΚΗ ΠΕΡΙΦΕΡΕΙΑ ΠΕΛΟΠΟΝΝΗΣΟΥ  
ΙΟΝΙΩΝ ΝΗΣΩΝ, ΗΠΕΙΡΟΥ & ΔΥΤΙΚΗΣ ΕΛΛΑΔΑΣ  
ΠΑΝΕΠΙΣΤΗΜΙΑΚΟ ΓΕΝΙΚΟ ΝΟΣΟΚΟΜΕΙΟ ΙΩΑΝΝΙΝΩΝ  
ΕΠΙΣΤΗΜΟΝΙΚΟ ΣΥΜΒΟΥΛΙΟ  
Πληροφορίες: Τσολίγκα Αικ.  
Τηλ. 26510 99519  
Email: epsymb@uhi.gr

Ιωάννινα 20-3-2024  
Αριθμ.πρωτ. 201

ΠΡΟΣ: Τον Αναπληρωτή Διοικητή

**ΘΕΜΑ: «Έγκριση διεξαγωγής του πρωτοκόλλου της μελέτης NeoIPC/NeoDeco»**

**ΣΧΕΤ:** Το από 19-2-2024 έγγραφο του Δ/ντή της Νεογνολογικής Κλινικής, Καθηγητή κ. Γιάπρου Βασίλειο με την επισυναπτόμενη αλληλογραφία

Σας θέτουμε υπόψη τα παραπάνω σχετικά έγγραφα και σας κάνουμε γνωστό ότι το Ε.Σ. με την αριθμ. 6/12-3-2024 (θ.22) απόφασή του και αφού έλαβε υπόψη τη σύμφωνη γνώμη της Επιστημονικής Επιτροπής Έρευνας, εγκρίνει τη διεξαγωγή του πρωτοκόλλου της μελέτης NeoIPC/NeoDeco, η οποία υπεβλήθη προς έγκριση από τον Δ/ντή Νεογνολογικής Κλινικής, Καθηγητή κ. Γιάπρου Βασίλειο

Ο τίτλος της μελέτης είναι: «NeoDeco-Βελτιστοποίηση της μεθόδου φροντίδας kangaroo care για τη μείωση των σοβαρών περιστατικών νεογνικών λοιμώξεων/σηψαιμίας και του ανθεκτικού βακτηριακού αποικισμού σε βρέφη που διατρέχουν υψηλό κίνδυνο και βρίσκονται σε μονάδα εντατικής θεραπείας νεογνών: μια πραγματιστική, πολυκεντρική, παράλληλων ομάδων, τυχαιοποιημένη κατά θυλάκους, υβριδική μελέτη εφαρμογής – αποτελεσματικότητας.» της αναδόχου εταιρείας Fondazione Penta ETS και θα πραγματοποιηθεί στη MENN του Νοσοκομείου μας υπό την ευθύνη και εποπτεία του Δ/ντή αυτής κ.Γιάπρου Β.

Πρόκειται για μελέτη παρακολούθησης καταγραφής. Η NeoDeco είναι μια πολυκεντρική, παράλληλων ομάδων, τυχαιοποιημένη κατά θυλάκους μελέτη που αποσκοπεί στην αξιολόγηση της επίδρασης της εφαρμογής της βελτιστοποιημένης μεθόδου φροντίδας Kangaroo care (KC) σε μονάδες εντατικής νοσηλείας νεογνών (MENN) στην πίεση λόγω βακτηριακού αποικισμού και στο ποσοστό περιστατικών σοβαρής λοίμωξης /σηψαιμίας. Η μελέτης αναμένεται να έχει διάρκεια 17 μηνών και θα περιλαμβάνει 24 MENN από ευρωπαϊκές χώρες.

Η έναρξη θα γίνει μετά από τις σχετικές εγκρίσεις.

Εξετάστηκε και εγκρίνεται:

1. Το Πρωτόκολλο της μελέτης
2. Το Ενημερωτικό φυλλάδιο ασθενή και Έντυπο συγκατάθεσης μετά από ενημέρωση της NeoDeco

Το Επιστημονικό Συμβούλιο αποδέχεται τη σχετική γραπτή διαβεβαίωση του κυρίου Ερευνητή ότι ισχύουν τα παρακάτω:

1. Ο ερευνητής και οι συνεργάτες του έχουν την εξειδίκευση, την εμπειρία και την δυνατότητα διεξαγωγής της μελέτης.

| Όνοματεπώνυμο, Ιδιότητα                                          | Χρόνος απασχόλησης στη μελέτη σε σχέση με το χρόνο εργασίας στο Νοσοκομείο (%) |
|------------------------------------------------------------------|--------------------------------------------------------------------------------|
| 1. Μπαλτογιάννη Μαρία Δ/ντρια ΕΣΥ Νεογνολογίας                   | Εκτός ωραρίου εργασίας                                                         |
| 2. Γιάπρος Βασίλειος Καθηγητής Νεογνολογίας Δ/ντής Νεογνολογικής | 0,5%                                                                           |
| 3. Καμπέρη Μαρία Εξειδικευόμενη Νεογνολογίας                     | Εκτός ωραρίου εργασίας                                                         |
| 4. Τσουμάνη Ολγα Προϊσταμένη ΜΕΝΝ                                | Εκτός ωραρίου εργασίας                                                         |

2. Το κέντρο διαθέτει τον αριθμό εκείνο των ασθενών από τους οποίους θα επιλεγούν οι κατάλληλοι για συμμετοχή στη μελέτη στο χρονικό διάστημα που προβλέπεται από τη μελέτη.

3. Το κέντρο διαθέτει την υλικοτεχνική υποδομή που προβλέπεται στο πρωτόκολλο της μελέτης ώστε να παρέχει τη δυνατότητα διεξαγωγής και ολοκλήρωσης της μελέτης εντός του προβλεπόμενου χρόνου.

Για τη διεξαγωγή της μελέτης ουδεμία οικονομική επιβάρυνση θα υπάρξει για το Νοσοκομείο μας την Κλινική και τους συμμετέχοντες.

Το ως άνω πρωτόκολλο είναι πλήρες και καλύπτει τους κανόνες ηθικής και δεοντολογίας. Το Επιστημονικό Συμβούλιο του Νοσοκομείου μας αποφασίζει για την διενέργεια κλινικών μελετών λαμβάνοντας υπόψη τις ισχύουσες αρχές διακήρυξης του Ελσίνκι και της Ορθής Κλινικής πρακτικής (GCP) και η σύνθεσή του καλύπτει τις απαιτήσεις της Ορθής κλινικής πρακτικής. Το Ερευνητικό πρωτόκολλο θα πρέπει να πραγματοποιηθεί σύμφωνα με τα όσα ορίζονται στην αριθμ. ΔΥΓ3(α) οικ. 18910/19-2-2013 (ΦΕΚ 390/τΒ/21-2-2013) Υπουργική απόφαση.

Στην συνεδρίαση του Επιστημονικού Συμβουλίου έλαβαν μέρος:

Πρόεδρος: Κουλούρας Βασίλειος Καθηγητής Εντατικής Θεραπείας

Μέλη: Νάκα Αικατερίνη Καθηγήτρια Καρδιολογίας, Κωστήνη Ελεονώρα Δ/ντρια ΕΣΥ ΜΕΘ, Λαγός Νικόλαος ΕΑ Αναισθησιολογίας (ΜΕΘ), Νάτσιος Δημήτριος ΕΒ Γενικής Ιατρικής, Μπαϊρακτάρη Ελένη Καθηγήτρια Βιολογικής Χημείας, Ράρας Νικόλαος ΤΕ Ιατρικών Εργαστηρίων, Σταυράκη Μαριάννα Ειδικευόμενη Ορθοπαιδικής και Καραβασίλη Νικολέττα ΤΕ Νοσηλευτικής.

**Ο ΠΡΟΕΔΡΟΣ ΤΟΥ ΕΠΙΣΤΗΜΟΝΙΚΟΥ ΣΥΜΒΟΥΛΙΟΥ**



**Κουλούρας Βασίλειος  
Καθηγητής Εντατικής Θεραπείας  
Δ/ντής Κλινικής Εντατικής Θεραπείας**

HELLENIC REPUBLIC

MINISTRY OF HEALTH

6th Health District of Peloponnese, Ionian Islands, Epirus & Western Greece

UNIVERSITY GENERAL HOSPITAL OF IOANNINA

SCIENTIFIC COUNCIL

Subject: Approval for the conduct of the study protocol NeoIPC/NeoDeco

Date: 20-03-2024

The Scientific Council, after reviewing the submission by Professor Vasileios Giapros, Director of the Neonatology Clinic, and considering the positive opinion of the Scientific Research Committee, approves the conduct of the NeoIPC/NeoDeco study protocol.

Study Title:

"NeoDeco – Optimization of the kangaroo care method to reduce severe neonatal infections/sepsis and resistant bacterial colonization in high-risk infants in NICUs: a pragmatic, multicenter, parallel-group, cluster-randomized hybrid implementation–effectiveness study."

The study will take place in the NICU of the University General Hospital of Ioannina under the supervision of Professor Giapros. The study is observational/recording and will last 17 months, involving 24 NICUs across Europe.

Reviewed and approved:

1. Study Protocol
2. Patient Information Sheet & Informed Consent Form (NeoDeco)

The Principal Investigator confirms that:

- The research team has the required expertise and capability.
- The center has sufficient eligible patients.
- The center meets all infrastructure requirements.
- No financial burden will be placed on the Hospital or participants.

Study Personnel:

- Maria Baltogianni, Director of Neonatology (NHS) – Outside working hours
- Vasileios Giapros, Professor & Director – 0.5%
- Maria Kamperi, Neonatology trainee – Outside working hours
- Olga Tsoumani, NICU Head Nurse – Outside working hours

The Scientific Council confirms compliance with the Declaration of Helsinki and Good Clinical Practice (GCP) and requires full adherence to Ministerial Decision ΔΥΤ3(α) οικ. 18910/19-2-2013.

Meeting Participants:

Chair: Professor Vasileios Koulouras, Intensive Care Medicine

Members include: A. Naka, E. Kostanti, N. Lagos, D. Natsias, E. Bairaktari, N. Rarras, M. Stavraki, N. Karavasili.

Chair of the Scientific Council:

Professor Vasileios Koulouras

**Greece**

University General Hospital of Patras

6<sup>η</sup> ΥΓΕΙΟΝΟΜΙΚΗ ΠΕΡΙΦΕΡΕΙΑ  
ΠΕΛΟΠΟΝΝΗΣΟΥ, ΙΟΝΙΩΝ ΝΗΣΩΝ, ΗΠΕΙΡΟΥ  
& ΔΥΤΙΚΗΣ ΕΛΛΑΔΟΣ  
ΠΑΝΕΠΙΣΤΗΜΙΑΚΟ ΓΕΝΙΚΟ  
ΝΟΣΟΚΟΜΕΙΟ ΠΑΤΡΩΝ  
“ΠΑΝΑΓΙΑ Η ΒΟΗΘΕΙΑ”

ΕΠΙΣΤΗΜΟΝΙΚΟ ΣΥΜΒΟΥΛΙΟ

Πάτρα : 03.04.2024

Α.Π. : 174

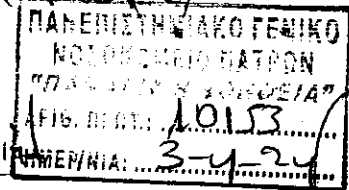

ΠΡΟΣ Γραφείο Κλινικών  
Μελετών ΠΓΝΠ

Ταχ. Διεύθυνση  
Πληροφορίες  
Τηλέφωνο

26500 Ρίο  
Δήμητρα Ευσταθίου  
2613.604.017

ΚΟΙΝ.: Καθ. Παιδιατρικής & Νεογνολογίας  
κ. Δημητρίου Γαβριήλ

**ΘΕΜΑ : ΕΓΚΡΙΣΗ ΔΙΕΞΑΓΩΓΗΣ ΜΕΛΕΤΗΣ**

Το Επιστημονικό Συμβούλιο στην συνεδρίαση 27.03.2024 λαμβάνοντας υπ’ όψιν την υπ. αρ. 136/14.03.2024 απόφαση της Επιτροπής Έρευνας Ηθικής και Δεοντολογίας, εγκρίνει τη διεξαγωγή επιδημιολογικής καταγραφής στα πλαίσια διεθνούς πρωτοκόλλου NeolPC με τίτλο «Infection Surveillance for Neonatology», η οποία θα διεξαχθεί στη Μονάδα Εντατικής Νοσηλείας Νεογνών του Π.Γ.Ν.Π. υπό την ευθύνη και εποπτεία του Καθηγητή Παιδιατρικής & Νεογνολογίας κ. Γαβριήλ Δημητρίου, που αφορά:

✓ Ερευνητικό Πρωτόκολλο Μελέτης

Επιστημονικός Υπεύθυνος:  
Ερευνητές:

Δημητρίου Γαβριήλ-Καθηγητής Παιδιατρικής & Νεογνολογίας  
Δάσιος Θεόδωρος-Αν. Καθηγητής Παιδιατρικής  
Γκέντζη Δέσποινα-Παιδιάτρος, Ακαδημαϊκή Υπότροφος Παιδιατρικής  
Παπαχατζή Ελένη-Επικουρ. Επιμελήτρια ΜΕΝΝ

Ο ΠΡΟΕΔΡΟΣ ΤΟΥ ΕΠΙΣΤΗΜΟΝΙΚΟΥ ΣΥΜΒΟΥΛΙΟΥ

ΚΑΘΗΓΗΤΗΣ ΜΑΡΚΟΣ ΜΑΡΑΓΚΟΣ

**ΤΑ ΜΕΛΗ**

Α. ΛΕΚΚΟΥ  
Μ. ΣΠΥΡΑΚΗ  
Α. ΣΑΡΑΝΤΟΠΟΥΛΟΣ  
Π. ΔΗΜΗΤΡΙΟΥ

Ακριβές Αντίγραφο  
Η Γραμματέας  
Δήμητρα Α. Ευσταθίου

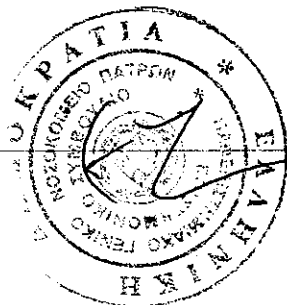

ΕΥΣΤΑΘΙΟΥ Α. ΔΗΜΗΤΡΙΟΥ

Τ.Ε. ΔΙΟΙΚΗΣΗ ΝΟΣΟΚΟΜΕΙΟΥ

SCIENTIFIC COUNCIL

Patras, 03.04.2024

Ref. No.: 174

TO: Clinical Trials Office, University General Hospital of Patras

CC: Professor of Pediatrics & Neonatology, G. Dimitriou

SUBJECT: APPROVAL FOR THE CONDUCT OF STUDY

The Scientific Council, in its meeting of 27.03.2024, taking into consideration decision no. 136/14.03.2024 of the Research Ethics and Deontology Committee, approves the conduct of an epidemiological registry within the international protocol NeoIPC titled “Infection Surveillance for Neonatology”. The study will be conducted in the Neonatal Intensive Care Unit (NICU) of the University General Hospital of Patras, under the responsibility and supervision of Professor of Pediatrics & Neonatology, Mr. Gabriel Dimitriou, and concerns the following:

Study Research Protocol

Scientific Supervisor:

- Gabriel Dimitriou – Professor of Pediatrics & Neonatology

Researchers:

- Theodoros Dasios – Associate Professor of Pediatrics
- Despina Gkentzi – Pediatrician, Academic Fellow in Pediatrics
- Eleni Papachatzis – Assistant Consultant, NICU

THE CHAIR OF THE SCIENTIFIC COUNCIL

Professor Markos Maragos

Members:

A. Lekkou

M. Spyraiki

A. Sarantopoulos

P. Dimitriou

Certified Copy

Secretary: Dimitra A. Efstathiou

**Greece**

Hippokration Hospital

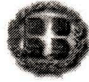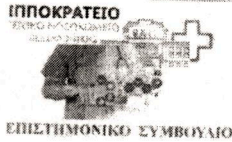

ΕΠΙΣΤΗΜΟΝΙΚΟ ΣΥΜΒΟΥΛΙΟ

**ΕΠΙΣΤΗΜΟΝΙΚΟ ΣΥΜΒΟΥΛΙΟ**  
Κωνσταντινουπόλεως 49,  
54426 Θεσ/νίκη  
τηλ. 2313 312709  
e-mail: esimv@ippokratio.gr  
Πληροφορίες: Α. Κωτούλα

Θεσσαλονίκη 15-05-2024

Αριθμ. Πρωτ. Ε.Σ.: 212

Πρόεδρος:

Μουλούδη Ελένη

Μέλη:

Γλυνάσης Μικέσ  
Φώτας Αστέριος  
Χοχλιούρου Ελπίς  
Τριανταφύλλου Κων/νος  
Καπερώνη Μαρία  
Βελίκος Κων/νος  
Καρακάση Κων/να  
Χρήστου Αγγελική

Προς

- Α.Τ.Ε.Π.Ε.Σ.Ε.

**Θέμα:** Έγκριση διεξαγωγής μη παρεμβατικής μελέτης με κωδικό NeoDeco και τίτλο: «Μελέτη των επιπτώσεων της φροντίδας τύπου "καγκουρώ" (επαφή δέρμα με δέρμα) σε βρέφη που προσβάλλονται από βακτηριακές λοιμώξεις στη μονάδα εντατικής θεραπείας νεογνών» με κύριο ερευνητή τον κ. Σαραφίδη Κοσμά, Διευθυντή της ΜΕΝΝ ΑΠΘ του Νοσοκομείου και συνερευνητές τους κ.κ. Εμ. Ροηλίδη, Ομότιμος Καθηγητή Παιδιατρικής Λοιμωξιολογίας, Ηλ. Ιωσηφίδης Επικ. Καθηγητής Παιδιατρικής Λοιμωξιολογίας, Α. Κοντού Επιμελήτρια Α' ΜΕΝΝ ΑΠΘ, Μ. Σμιτσοπούλου, Επιστημονική Συνεργάτης, Χ. Ζάρρας, Διευθυντής ΕΣΥ Βιοπαθολογικό Εργαστήριο, Κ. Τσώνη, Επιμελήτρια Α' ΜΕΝΝ ΑΠΘ, Α. Φτεργιώτη, Επιστημονική Συνεργάτης (αρ.πρωτ.ΕΣ: 212/19-03-2024).

Το Επιστημονικό Συμβούλιο, κατά την 5<sup>η</sup>/23-04-2024 Συνεδρίαση του (θέμα 40<sup>ο</sup>), με παρόντες τους:

- Μουλούδη Ελένη, Διευθύντρια ΕΣΥ, Μ.Ε.Θ. Ενηλίκων (Πρόεδρος)
- Φώτας Αστέριος, Διευθυντής ΕΣΥ, Ουρολογικής Κλινικής (μέλος)
- Χοχλιούρου Ελπίς, Διευθύντρια ΕΣΥ, ΜΕΘ Παιδών (μέλος)
- Καρακάση Κωνσταντίνα, Ειδικευόμενη Χειρουργικής Κλινικής Μεταμοσχεύσεων (μέλος)
- Βελίκος Κωνσταντίνος, ΤΕ Εργοθεραπευτών (μέλος)
- Καπερώνη Μαρία, ΠΕ Ψυχολόγων Παιδοψυχιατρικού Τμήματος (μέλος)
- Χρήστου Αγγελική, ΠΕ Νοσηλευτριών, Αν. Προϊσταμένη Χειρουργικής Κλινικής Μεταμοσχεύσεων (μέλος)

αφού έλαβε υπόψη του:

1. Το διαβιβαστικό έγγραφο του ΑΤΕΠΕΣΕ σχετικά με το με αριθμ. πρωτ 10371/29-02-2024 έγγραφο του κ. Σαραφίδη Κοσμά, Διευθυντή της ΜΕΝΝ ΑΠΘ του Νοσοκομείου με το οποίο ζητά την έγκριση διεξαγωγής της ανωτέρω κλινικής μελέτης.

2. Τον συνημμένο σχετικό φάκελο της μελέτης που περιέχει:

1. Το πρωτόκολλο NeoDeco.
2. Σύνοψη NeoDeco.

Chairman:

Mouloudi Helen

Members:

Glynatsis Mikes  
Fotas Asterios  
Xochliourou Elpis  
Triantafyllou Kon/nos  
Kaperoni Maria  
Velikos Kon/nos  
Karakasi Kon/na  
Xristou Aggeliki

3. Ενημερωτικό φυλλάδιο ασθενή και έντυπο συγκατάθεσης μετά από ενημέρωση της NeoDeco.
4. Μεταφρασμένο ενημερωτικό φυλλάδιο ασθενή και έντυπο συγκατάθεσης μετά από ενημέρωση της NeoDeco.
5. Ειδοποίηση απορρήτου και συγκατάθεση για την επεξεργασία δεδομένων της NeoDeco
6. Κατάλογος μεταβλητών εντύπου περιπτωσιολογικών εκθέσεων (CRF)
7. Προσχέδιο σύμβασης και προϋπολογισμού.
8. Ασφάλιση.

3. Το γεγονός ότι πρόκειται για μια μελέτη με κύριο στόχο αποτελεσματικότητας τον προσδιορισμό των επιπτώσεων σε νεογνά υψηλού κινδύνου που γεννιούνται μετά από κύηση < 32 εβδομάδων και υποβάλλονται σε διαχείριση υψηλής τεχνολογίας μονάδες νεογνών που εφαρμόζουν βελτιστοποιημένη φροντίδα τύπου «καγκουρό» σε επίπεδο μονάδας, συγκριτικά με την τυπική περίθαλψη ως προς τα εξής: σοβαρή λοίμωξη/σηψαιμία νεογνών ή/και αποικισμός με ανθεκτικά βακτήρια ενδιαφέροντος σε βάθος χρόνου.

4. Τη δήλωση του κύριου ερευνητή και των συνεργατών του ότι διαθέτουν την εμπειρία, την εξειδίκευση και τη δυνατότητα διεξαγωγής της μελέτης και ο χρόνος ενασχόλησης του καθενός με τη Μελέτη δε θα υπερβαίνει το 5% του χρόνου απασχόλησης από το κύριο έργο τους.

5. Η μελέτη θα πραγματοποιηθεί στην Α' Νεογνολογική Κλινική του ΓΝΙΘ Ιπποκράτειου και ΜΕΝΝ ΑΠΘ υπο την επίβλεψη του ομότιμου Καθηγητή Λοιμωξιολογίας κ. Εμμανουήλ Ροηλίδη. Το μέγεθος του δείγματος θα εξαρτηθεί από τον αριθμό των εισαγωγών και αναμένεται να κυμανθεί στα 110 νεογνά.

6. Η διάρκεια της μελέτης θα είναι 17 μήνες για κάθε συμμετέχουσα μονάδα εντατικής θεραπείας νεογνών, συνολική διάρκεια μελέτης 20 μήνες.

7. Τη δήλωση του κύριου ερευνητή ότι δεν θα παραβιαστούν τα προσωπικά δεδομένα των ασθενών και η μελέτη θα διεξαχθεί σύμφωνα με τους κανόνες της ορθής κλινικής πρακτικής.

8. Τη δήλωση του κύριου ερευνητή ότι η κλινική του ΓΝΘ Ιπποκράτειο διαθέτει την υλικοτεχνική υποδομή που προβλέπεται από το πρωτόκολλο της μελέτης, ώστε να παρέχει την δυνατότητα διεξαγωγής και ολοκλήρωσης της μελέτης εντός του προβλεπόμενου χρόνου.

9. Το γεγονός ότι δεν θα επιβαρυνθεί επιπλέον το Νοσοκομείο.

11. Την υπ' αριθμ. ΔΥΓ3(α)/οικ. 18910/21-2-2013, (ΦΕΚ Β'390/21-2-2013) Κοινή Υπουργική Απόφαση «Εναρμόνιση της Ελληνικής Νομοθεσίας προς την αντίστοιχη οδηγία 2001/20/ ΕΚ του Ευρωπαϊκού Κοινοβουλίου της 4<sup>ης</sup> Απριλίου 2001 για την προσέγγιση των νομοθετικών, κανονιστικών και διοικητικών διατάξεων των κρατών μελών όσον αφορά την εφαρμογή ορθής κλινικής πρακτικής κατά τις κλινικές μελέτες φαρμάκων προοριζομένων για τον άνθρωπο», όπως αυτή τροποποιήθηκε ήδη και ισχύει σήμερα, προς το σκοπό εναρμόνισης, απλούστευσης και εξορθολογισμού των διαδικασιών διεξαγωγής των Κλινικών Μελετών.

12. Το υπ' αριθμ. πρωτ. 4726/1-4-2013 έγγραφο της 4<sup>ης</sup> Υ.Πε. Μακεδονίας και Θράκης με θέμα: «Εφαρμογή της υπ' αριθμ. ΔΥΓ3(α)/οικ. 18910/21-2-2013 Νέας Κοινής Υπουργικής Απόφασης αναφορικά με την αναθεωρημένη διαδικασία έγκρισης των κλινικών μελετών(ΦΕΚ Β'390/21-2-2013).

13. Το γεγονός ότι το πρωτόκολλο πληροί τις ισχύουσες διατάξεις του άρθρου 47 του Ν.2071/1992, τις ισχύουσες αρχές της συνθήκης του Ελσίνκι, για τη διενέργεια των κλινικών μελετών και την Αριθ.ΔΥΓ3/89292/31.12.2003 κοινή υπουργική απόφαση του Υπουργού Οικονομίας και Οικονομικών και του Υπουργού Υγείας και Πρόνοιας που αναφέρεται στην Εναρμόνιση της Ελληνικής Νομοθεσίας προς την αντίστοιχη οδηγία 2001/20/ ΕΚ του Ευρωπαϊκού Κοινοβουλίου της 4<sup>ης</sup> Απριλίου 2001.

14. Την υπ'αριθμ. Γ5α/59676 Κοινή Υπουργική Απόφαση (ΦΕΚ 4131/τ.Β'/22-12-2016) «Διατάξεις για την εφαρμογή του Κανονισμού (ΕΕ) αριθ. 536/2014 του Ευρωπαϊκού Κοινοβουλίου και του Συμβουλίου της 16ης Απριλίου 2014 για τις κλινικές δοκιμές που προορίζονται για τον άνθρωπο και την κατάργηση της Οδηγίας 2001/20/ΕΚ ».

15. Τον Νόμο 4523/ΦΕΚ 41<sup>Α</sup>/7-3-2018, άρθρο 4, περί συγκρότησης επιτροπής Μη Παρεμβατικών Μελετών του ΕΟΦ

16. Την υπ'αριθμ. Δ3(α) οικ. 36809/ΦΕΚ 2015Β/3-6-2019, Τροποποίηση και συμπλήρωση της Γ5α/59676/ 2016 (ΦΕΚ 4131 Β') απόφασης των Υπουργών Οικονομίας και Ανάπτυξης και Υγείας «Διατάξεις για την εφαρμογή του Κανονισμού (ΕΕ) αριθμ.536/2014 του Ευρωπαϊκού Κοινοβουλίου και του Συμβουλίου της 16<sup>ης</sup> Απριλίου 2014 για τις κλινικές δοκιμές που προορίζονται για τον άνθρωπο και την κατάργηση της Οδηγίας 2001/20/ΕΚ», άρθρο 32, περί διαδικασίας έγκρισης και αποδοχής διεξαγωγής μη παρεμβατικής μελέτης.

17. Το υπ'αριθμ. πρωτ. 29383/30-7-2019 έγγραφο της 4<sup>ης</sup> Υ.Πε. Μακεδονίας και Θράκης με θέμα: «Διαβίβαση του με αριθμ. πρωτ. έγγραφο 45751/13-6/2019 της 2<sup>ης</sup> ορθής επανάληψης της Εγκυκλίου του Γενικού Γραμματέα του Υ. Υγείας για τη διεξαγωγή μη παρεμβατικών μελετών σε Νοσοκομεία του ΕΣΥ».

18. Τον Νόμο 4683/ΦΕΚ 83Α/10-4-20 άρθρο 17 με το οποίο καταργείται το άρθρο 4 του Ν.4523/ΦΕΚ 41Α/7-3-18 σχετικά με τη διαδικασία για την έγκριση και διενέργεια των μη παρεμβατικών μελετών.

19. Την Απόφαση Διοικητού αριθμ 375/05-03-2021 για τον Εσωτερικό Κανονισμό Διαχείρισης Μελετών, Ερευνών και Εργασιών που διεξάγονται στο Νοσοκομείο.

20. Τον Νόμο 4812/ΦΕΚ 110Α/30-6-2021, άρθρο 87 περί βιοιατρικής έρευνας.

21. Την Απόφαση Διοικητού αριθμ 708/09-04-2024 Ορθή Επανάληψη για την συγκρότηση ειδικών επιτροπών του Επιστημονικού Συμβουλίου.

22. Το με αριθμό πρωτ. ΕΣ: 297/19-04-2024 έγγραφο της Επιτροπής Έρευνας και Κλινικών Μελετών με επισυναπτόμενη θετική εισήγηση.

#### ΕΙΣΗΓΕΙΤΑΙ

Την έγκριση διεξαγωγής μη παρεμβατικής μελέτης με κωδικό NeoDeco και τίτλο: «Μελέτη των επιπτώσεων της φροντίδας τύπου "καγκουρώ" (επαφή δέρμα με δέρμα) σε βρέφη που προσβάλλονται από βακτηριακές λοιμώξεις στη μονάδα εντατικής θεραπείας νεογνών» με κύριο ερευνητή τον κ. Σαραφίδη Κοσμά, Διευθυντή της ΜΕΝΝ ΑΠΘ του Νοσοκομείου και συνερευνητές τους κ.κ. Εμ. Ροηλίδη, Ομότιμος Καθηγητή Παιδιατρικής Λοιμωξιολογίας, Ηλ. Ιωσηφίδης Επικ. Καθηγητής Παιδιατρικής Λοιμωξιολογίας, Α. Κοντού Επιμελήτρια Α' ΜΕΝΝ ΑΠΘ, Μ. Σμιτσοπούλου, Επιστημονική Συνεργάτης, Χ. Ζάρρας, Διευθυντής ΕΣΥ Βιοπαθολογικό Εργαστήριο, Κ. Τσώνη,

Επιμελήτρια Α' ΜΕΝΝ ΑΠΘ, Α. Φτεργιώτη, Επιστημονική Συνεργάτης (αρ.πρωτ.ΕΣ: 212/19-03-2024), σύμφωνα με τα ανωτέρω.

Η Πρόεδρος του Επιστημονικού Συμβουλίου

Μουλούδη Ελένη



4th HEALTH REGION OF MACEDONIA & THRACE  
GENERAL HOSPITAL OF THESSALONIKI “HIPPOKRATION” – SCIENTIFIC COUNCIL  
Thessaloniki, 15-05-2024

Protocol No.: 212

Subject: Approval for conducting the non-interventional study coded NeoDeco titled:  
“Study of the effects of kangaroo care (skin-to-skin contact) in infants affected by bacterial infections in the Neonatal Intensive Care Unit (NICU).”

Principal Investigator:

- Kosmas Sarafidis, Director of the NICU AUTH

Co-Investigators:

- E. Roilides – Emeritus Professor of Pediatric Infectious Diseases
- H. Iosifidis – Assistant Professor of Pediatric Infectious Diseases
- A. Kontou – Consultant A, NICU AUTH
- M. Simitsopoulou – Scientific Associate
- Ch. Zarras – Director, Clinical Microbiology Laboratory
- K. Tsoni – Consultant A, NICU AUTH
- A. Ftergioti – Scientific Associate

During its 5th Meeting of 23-04-2024, the Scientific Council reviewed:

1. Submission request 10371/29-02-2024 from Dr. Sarafidis requesting approval.
2. Complete NeoDeco dossier including protocol, summary, PIS/ICF (GR & EN), privacy notice, CRF variables, draft contract & budget, insurance.
3. Study objective: evaluate effects of optimized kangaroo care on severe infection/sepsis and resistant bacterial colonization in high-risk neonates <32 weeks.
4. Confirmation of expertise and ≤5% time commitment for all investigators.
5. Study site: 1st Neonatology Clinic GNTH Hippokration & NICU AUTH; estimated sample 110 infants.
6. Study duration: 17 months per NICU; 20 months total.
7. Assurance of compliance with personal data protection and GCP.
8. Confirmation of adequate infrastructure.
9. No financial burden for the hospital.
10. Review of applicable regulatory frameworks.
11. Joint Ministerial Decision ΔΥΤ3(α)/οικ. 18910/21-2-2013 aligning Greek law with Directive 2001/20/EC.
12. Document 4726/1-4-2013 from 4th Health Region regarding implementation of above decision.
13. Compliance with Article 47 of Law 2071/1992 and the Helsinki Declaration.
14. Joint Ministerial Decision Γ5α/59676 (FEK 4131/B'/22-12-2016) implementing EU Regulation 536/2014.
15. Law 4523/FEK 41A/7-3-2018 on Non-Interventional Study Committees.
16. Decision Δ3(α) οικ. 36809/FEK 2015B/3-6-2019 amending provisions for implementation of EU Regulation 536/2014.
17. Document 29383/30-7-2019 – circular on procedures for non-interventional studies in hospitals.
18. Law 4683/FEK 83A/10-4-2020 repealing Article 4 of Law 4523.
19. Decision 375/05-03-2021 – Internal Research & Study Governance Policy.
20. Law 4812/FEK 110A/30-6-2021 – biomedical research provisions.
21. Decision 708/09-04-2024 – reconstitution of Scientific Council subcommittees.
22. Document ES: 297/19-04-2024 with positive recommendation from the Research & Clinical Studies Committee.

Decision:

Approval is granted for the NeoDeco non-interventional study with Principal Investigator Dr. Kosmas Sarafidis and listed co-investigators.

Chair of the Scientific Council:

Eleni Mouloudi

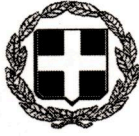

4η ΔΙΟΙΚΗΣΗ ΥΓΕΙΟΝΟΜΙΚΗΣ ΠΕΡΙΦΕΡΕΙΑΣ  
ΜΑΚΕΔΟΝΙΑΣ & ΘΡΑΚΗΣ  
ΓΕΝΙΚΟ ΝΟΣΟΚΟΜΕΙΟ ΘΕΣΣΑΛΟΝΙΚΗΣ  
«Ι Π Π Ο Κ Ρ Α Τ Ε Ι Ο»  
Κωνσταντινουπόλεως αρ. 49, 546 42 Θεσσαλονίκη

**ΑΠΟΦΑΣΗ ΑΡΧΙΚΗΣ ΕΓΚΡΙΣΗΣ ΔΙΕΝΕΡΓΕΙΑΣ  
ΜΗ ΠΑΡΕΜΒΑΤΙΚΗΣ ΚΛΙΝΙΚΗΣ ΜΕΛΕΤΗΣ**

**Αριθμ. Πρωτοκ κατάθεσης:** 10371/29-2-24

**Κωδικός Μελέτης:** NeoDeco

**Φ.Φ:** 24-M-13

**Τίτλος μελέτης:** Μελέτη των επιπτώσεων της φροντίδας τύπου «καγκουρό» (επαφή δέρμα με δέρμα) σε βρέφη που προσβάλλονται από βακτηριακές λοιμώξεις στη μονάδα εντατικής θεραπείας νεογνών.

**Κύριος Ερευνητής:** ΣΑΡΑΦΙΔΗΣ ΚΟΣΜΑΣ

**Χορηγός:** Fondazione Penta ETS

**ΕΓΚΡΙΣΗ ΔΙΕΝΕΡΓΕΙΑΣ ΜΗ ΠΑΡΕΜΒΑΤΙΚΗΣ ΚΛΙΝΙΚΗΣ ΜΕΛΕΤΗΣ**

Ως νόμιμος εκπρόσωπος του Νοσοκομείου, μετά από μελέτη της εισήγησης της Προϊσταμένης του ΑΤΕΠΕΣΕ σχετικά με την πληρότητα και ορθότητα των απαραίτητων δικαιολογητικών και τήρηση των προβλεπόμενων από τη Νομοθεσία διαδικασιών, και την σχετική εισήγηση του Επιστημονικού Συμβουλίου, κατά την 5η /23-4-24 συνεδρίαση (θέμα 40ο) ΕΣ 212/15-5-2024, εγκρίνω την διενέργεια της ως άνω προτεινόμενης μελέτης

22/5/2024

Ο ΔΙΟΙΚΗΤΗΣ  
ΤΟΥ ΙΠΠΟΚΡΑΤΕΙΟΥ Γ.ΝΟΣΟΚΟΜΕΙΟΥ ΘΕΣ/ΝΙΚΗΣ

ΝΙΚΟΛΑΟΣ ΑΝΤΩΝΑΚΗΣ

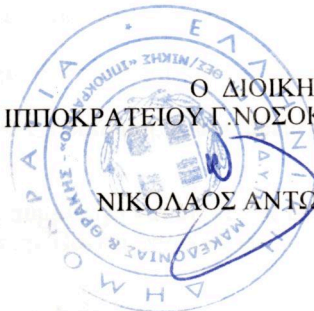

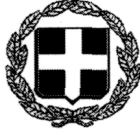

4th HEALTH ADMINISTRATION OF MACEDONIA &  
THRACE  
GENERAL HOSPITAL OF THESSALONIKI  
"IPOKRATEIO"  
Konstantinoupolis 49, 546 42 Thessaloniki

DECISION ON INITIAL APPROVAL OF NON-  
INTERVENTIONAL CLINICAL STUDY

No. **Date** of submission: IO37I/29-2-24 **Study** code:

**NeoDeco**

F.F.: 24-M-I3

**Study title:** **Study** of the effects of kangaroo care (skin-to-skin contact) on preventing bacterial infections in infants in the neonatal intensive care unit.

Principal Investigator: SARAFIDIS I(OSMAS)

Sponsor: **Fondazione Penta ETS**

EI"CRISIS MANAGEMENT OF INTERVENTI O N A L CLINICAL PRACTICE

As the legal representative of the Hospital, after reviewing the recommendation of the Head of the Department...eni1s... p... AT.i,PESE regarding the completeness and accuracy of the necessary supporting documents and the procedures required by law, and the civil recommendation of the Scientific Council, on 5th Ω3-4-24 ...>neidri'as Subject 400) ES 212/15-5-2024, I approve the action of the above-mentioned proposal

22/5/2024

THE DIRECTOR  
OF THE HIPPOKRATIC HOSPITAL OF THESSALONIKI

NIKOLAIOS ANTONAKHZ

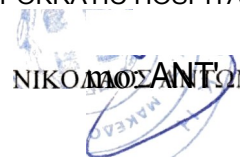

**Greece**

Aglaia Kyriakou Children's Hospital, Athens

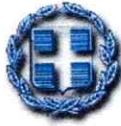

ΕΛΛΗΝΙΚΗ ΔΗΜΟΚΡΑΤΙΑ  
ΥΠΟΥΡΓΕΙΟ ΥΓΕΙΑΣ  
1<sup>η</sup> ΥΓΕΙΟΝΟΜΙΚΗ ΠΕΡΙΦΕΡΕΙΑ ΑΤΤΙΚΗΣ  
**ΓΕΝΙΚΟ ΝΟΣΟΚΟΜΕΙΟ ΠΑΙΔΩΝ ΑΘΗΝΩΝ**  
**« ΠΑΝ. & ΑΓΛΑΪΑΣ ΚΥΡΙΑΚΟΥ »**  
**Ν.Π.Δ.Δ.**

**ΓΡΑΜΜΑΤΕΙΑ**  
**ΔΙΟΙΚΗΤΙΚΟΥ ΣΥΜΒΟΥΛΙΟΥ**

Αθήνα 15.05.2024

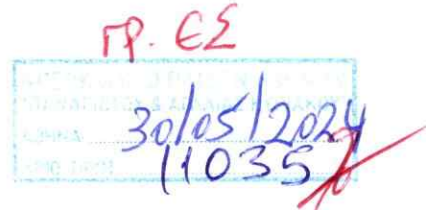

**ΠΡΟΣ :** Τη ΔΙΕΥΘΥΝΣΗ ΔΙΟΙΚΗΤΙΚΗΣ  
ΥΠΗΡΕΣΙΑΣ

### ΔΙΑΒΙΒΑΣΤΙΚΟ

Σας διαβιβάζουμε απόσπασμα πρακτικού Διοικητικού Συμβουλίου της 11<sup>ης</sup> Συνεδρίασης που πραγματοποιήθηκε στις 15.05.2024 ΘΕΜΑ 14 : **Έγκριση διεξαγωγής της κλινικής μελέτης Neo-Deco με τίτλο: «Βελτιστοποίηση φροντίδας τύπου «καγκουρό» για μείωση των σοβαρών περιστατικών λοιμώξεων/σηψαιμίας των νεογνών και ανθεκτικού βακτηριακού αποικισμού σε βρέφη που διατρέχουν υψηλό κίνδυνο και βρίσκονται σε μονάδα εντατικής θεραπείας νεογνών: μια πραγματιστική, πολυκεντρική, παράλληλης συστοιχίας, τυχαίοποιημένη, υβριδική μελέτη εφαρμογής – αποτελεσματικότητας»**, που κατέθεσε η κα Τσολιά Μαρία, Καθηγήτρια Παιδιάτρος – Λοιμωξιολόγος, Διευθύντρια της Β' Π.Π.Κ του ΕΚΠΑ και παρακαλούμε για τις δικές σας ενέργειες.

ΜΕ ΕΝΤΟΛΗ ΠΡΟΕΔΡΟΥ  
Η γραμματέας του Δ.Σ.

Χρυσούλα Λαζαρίδου

1η ΥΠΕ  
Ν. ΠΑΙΔΩΝ "Π&Α ΚΥΡΙΑΚΟΥ"  
ΑΡ. ΠΡΩΤ. : 11035  
ΗΜ/ΝΙΑ: 30/05/2024

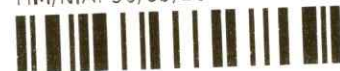

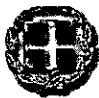

## ΠΡΑΚΤΙΚΟ 11<sup>ης</sup> ΣΥΝΕΔΡΙΑΣΗΣ

Αθήνα σήμερα 15 Μαΐου 2024 ημέρα Τετάρτη και ώρα 15:00 συνήλθε στην αίθουσα συνεδριάσεων του, στο κεντρικό κτίριο του Νοσοκομείου, σε τακτική συνεδρίαση το Εννεαμελές Διοικητικό Συμβούλιο, που συγκροτήθηκε βάσει των με αριθμό Γ4β/14427/15.03.2022, Φ.Ε.Κ. 233/23.03.2022, τεύχος Υ.Ο.Δ.Δ., Γ4β/οικ.:30621/ 27.05.2022, Φ.Ε.Κ. 456/03.06.2022, τεύχος Υ.Ο.Δ.Δ. και Γ4β/38088/10.08.2022 Φ.Ε.Κ. 726/12.08.2022, τεύχος Υ.Ο.Δ.Δ. αποφάσεων του Υπουργού Υγείας κ. Αθανάσιου Πλεύρη και Αναπληρώτριας Υπουργού κ. Ασημίνας Γκάγκα

Στη συνεδρίαση προσήλθαν και παρέστησαν νόμιμα καλεσμένοι, οι παρακάτω :

Παρόντες/ούσες οι κ. κ. :

|                             |              |
|-----------------------------|--------------|
| <b>ΕΜΜΑΝΟΥΗΛ ΠΑΠΑΣΑΒΒΑΣ</b> | Πρόεδρος     |
| <b>ΚΩΝ/ΝΟΣ ΤΟΥΤΟΥΖΑΣ</b>    | Αντιπρόεδρος |
| <b>ΜΑΡΙΟΓΚΑ ΦΡΑΓΚΑΚΗ</b>    | Μέλος        |
| <b>ΑΘΑΝΑΣΙΟΣ ΜΠΙΝΗΣ</b>     | Μέλος        |
| <b>ΙΩΑΝΝΑ ΣΑΠΟΥΝΤΖΗ</b>     | Μέλος        |
| <b>ΑΝΔΡΕΑΣ ΤΟΣΚΑΣ</b>       | Μέλος        |
| <b>ΑΓΓΕΛΙΚΗ ΝΙΚΑ</b>        | Μέλος        |
| <b>ΑΝΝΑ ΔΗΜΗΤΡΟΥ</b>        | Μέλος        |

Απούσα η κ. :

**ΧΡΥΣΟΥΛΑ ΝΙΚΟΛΟΠΟΥΛΟΥ** Μέλος

Στη συνεδρίαση προσήλθε και παρέστη ως Γραμματέας του Συμβουλίου η **Χρυσούλα Λαζαρίδου**.

Διαπιστώθηκε απαρτία με την παρουσία οκτώ (8) μελών του Συμβουλίου.

**ΘΕΜΑ 14 :** Έγκριση διεξαγωγής της κλινικής μελέτης Neo-Deco με τίτλο: «Βελτιστοποίηση φροντίδας τύπου «καγκουρό» για μείωση των σοβαρών περιστατικών λοιμώξεων/σηψαιμίας των νεογνών και ανθεκτικού βακτηριακού αποικισμού σε βρέφη που διατρέχουν υψηλό κίνδυνο και βρίσκονται σε μονάδα εντατικής θεραπείας νεογνών: μια πραγματιστική, πολυκεντρική, παράλληλης συστοιχίας, τυχαιοποιημένη, υβριδική μελέτη εφαρμογής – αποτελεσματικότητας», που κατέθεσε η κα Τσολιά Μαρία, Καθηγήτρια Παιδιάτρως – Λοιμωξιολόγος, Διευθύντρια της Β' Π.Π.Κ του ΕΚΠΑ.

Στο Συμβούλιο υποβάλλεται η υπ' αριθμ. πρωτ.: 9577/13.05.2024 (ΓΡΑΜΜΑΤΕΙΑ ΕΠΙΣΤΗΜΟΝΙΚΟΥ ΣΥΜΒΟΥΛΙΟΥ) εισήγηση του ΑΝΑΠΛΗΡΩΤΗ ΔΙΟΙΚΗΤΗ κ. Α. ΤΟΣΚΑ η οποία έχει ως ακολούθως :

«Έχοντας υπόψη :

1. Την υπ' αριθμ. πρωτ. Ε.Σ.: 107/13.03.2024 αίτηση για την έγκριση διεξαγωγής της κλινικής μελέτης με τίτλο: «Βελτιστοποίηση φροντίδας τύπου «καγκουρό» για μείωση των σοβαρών περιστατικών λοιμώξεων/σηψαιμίας των νεογνών και ανθεκτικού βακτηριακού αποικισμού σε βρέφη που διατρέχουν υψηλό κίνδυνο και βρίσκονται σε μονάδα εντατικής θεραπείας νεογνών:

μια πραγματιστική, πολυκεντρική, παράλληλης συστοιχίας, τυχαιοποιημένη, υβριδική μελέτη εφαρμογής – αποτελεσματικότητας», που κατέθεσε η κα Τσολιά Μαρία, Καθηγήτρια Παιδίατρος – Λοιμωξιολόγος, Διευθύντρια της Β' Π.Π.Κ του ΕΚΠΑ.

2. Ότι το Επιστημονικό Συμβούλιο κατά την 5<sup>η</sup>/29-04-2024 (Θ:13) έλαβε υπόψη του τη θετική εισήγηση της Επιτροπής Ηθικής και Δεοντολογίας, η οποία κατά την 1η /29.03.2024 συνεδρίασή της μελέτησε τα κατατεθειμένα έγγραφα της ανωτέρω μελέτης.

Μέλη που συμμετέχουν στην μελέτη:

- Τσολιά Μαρία, Καθηγήτρια Παιδίατρος – Λοιμωξιολόγος, Διευθύντρια της Β' Π.Π.Κ του ΕΚΠΑ, Κύρια Ερευνήτρια για το ΓΝΠΑ Π.& Α. Κυριακού
- Αγγελική Νίκα, Διευθύντρια ΜΕΝΝ
- Κασσάνδρα Ταταροπούλου, Επιμελήτρια Α' ΜΕΝΝ
- Βάσση Ιππολύτη, Επιμελήτρια Β' ΜΕΝΝ

Η NeoDeco (σύντομος τίτλος μελέτης), είναι μία πραγματιστική, πολυκεντρική, παράλληλων ομάδων, συστοιχίας τυχαιοποιημένη υβριδική μελέτη αποτελεσματικότητας - εφαρμογής με αξιολόγηση γραμμής βάσης, προκαταρκτική περίοδο και διαδοχική τυχαιοποίηση.

Θα συμμετέχουν 24 μονάδες εντατικής θεραπείας νεογνών από Ελλάδα, Ιταλία, Ισπανία, Ελβετία και Ηνωμένο Βασίλειο. Βάσει της επανεκτίμησης του προκαθορισμένου μεγέθους δείγματος, ενδέχεται να ανοίξουν και πρόσθετα κέντρα. Σε όλα τα κέντρα θα παρέχεται υποστήριξη εφαρμογής για βελτιστοποιημένη Φροντίδα τύπου «καγκουρό» στο πλαίσιο της μελέτης.

Η μελέτη χρηματοδοτείται από το πρόγραμμα έρευνας και καινοτομίας Ευρωπαϊκής Ένωσης Horizon 2020.

Ο πληθυσμός της μελέτης αφορά νεογνά υψηλού κινδύνου που γεννιούνται πριν από τη συμπλήρωση 32 εβδομάδων κύησης και εισάγονται στις συμμετέχουσες μονάδες εντατικής θεραπείας νεογνών.

Κύριο στόχο αποτελεσματικότητας αποτελεί ο προσδιορισμός των επιπτώσεων σε νεογνά υψηλού κινδύνου που γεννιούνται μετά από κύηση < 32 εβδομάδων και υποβάλλονται σε διαχείριση σε υψηλής τεχνολογίας μονάδες νεογνών που εφαρμόζουν βελτιστοποιημένη φροντίδα τύπου «καγκουρό» σε επίπεδο μονάδας, συγκριτικά με την τυπική περίθαλψη ως προς τα εξής:

- Σοβαρή λοίμωξη/σηψαιμία νεογνών ή / και
- Αποικισμός με ανθεκτικά βακτήρια ενδιαφέροντος σε βάθος χρόνου

Κύριος στόχος αξιολόγησης εφαρμογής μέσω συνεχόμενης παρακολούθησης της διαδικασίας εφαρμογής και ανάλυσης των εκβάσεων της:

- Η αξιολόγηση της πιστότητας, της αποδοχής, της σκοπιμότητας και της διατήρησης της επέμβασης σχετικά με την επαφή δέρμα με δέρμα για βελτιστοποιημένη φροντίδα τύπου «καγκουρό»,
- Η αξιολόγηση στρατηγικών εφαρμογής σχετικά με την πιστότητα, την αποδοχή, τη σκοπιμότητα και τη διατήρηση,
- Ο εντοπισμός παραγόντων διευκόλυνσης και αποτρεπτικών παραγόντων στην εφαρμογή επαφής δέρμα με δέρμα για βελτιστοποιημένη φροντίδα τύπου «καγκουρό»

Στόχο της υγειονομικής – οικονομικής αξιολόγησης αποτελεί η αξιολόγηση της αποδοτικότητας της βελτιστοποιημένης φροντίδας τύπου «καγκουρό» και της προσέγγισης εφαρμογής.

Η διάρκεια της μελέτης είναι 17 μήνες για κάθε συμμετέχουσα μονάδα εντατικής θεραπείας νεογνών, η συνολική διάρκεια μελέτης είναι 20 μήνες.

#### ΚΡΙΤΗΡΙΑ ΕΝΤΑΞΗΣ ΚΕΝΤΡΟΥ ΜΕΛΕΤΗΣ

1. Ευρωπαϊκές μονάδες εντατικής θεραπείας νεογνών που παρέχουν περίθαλψη ρουτίνας σε εξαιρετικά πρόωρα βρέφη (ηλικία κύησης < 28 εβδομάδες),

2. Ελάχιστος αριθμός 12 κλινών που προσφέρουν το υψηλότερο επίπεδο εντατικής φροντίδας νεογνών,
3. Διαθεσιμότητα ή πρόσβαση σε καταψύκτη θερμοκρασίας -70 έως -80°C για την αποθήκευση των δειγμάτων της έρευνας,
4. Προθυμία εφαρμογής βελτιστοποιημένης φροντίδας τύπου «καγκουρό» σε περίπτωση εκχώρησης στην ομάδα επέμβασης,
5. Προθυμία δέσμευσης ως προς την παροχή της ελάχιστης αναμενόμενης διάρκειας-στόχου ή αύξηση 50%, σε περίπτωση που η μονάδα εντατικής θεραπείας νεογνών προσφέρει ήδη την ελάχιστη αναμενόμενη διάρκεια-στόχο, σε περίπτωση εκχώρησης σε σκέλος επέμβασης,
6. Προετοιμασία για εφαρμογή επίβλεψης NeoIPC,
7. Επαρκείς πόροι και εξειδίκευση και εγκρίσεις από σχετικές Επιτροπές Δεοντολογίας Έρευνας, όπως ενδείκνυται.

#### ΚΡΙΤΗΡΙΑ ΑΠΟΚΛΕΙΣΜΟΥ ΚΕΝΤΡΟΥ ΜΕΛΕΤΗΣ

1. Η μονάδα εντατικής θεραπείας νεογνών εφαρμόζει ήδη «μακροχρόνια» StSC > 18 ωρών. Σημαντικές αναμενόμενες αλλαγές στην πίεση από αποικισμό από ανθεκτικά βακτήρια κατά τη διάρκεια της περιόδου μελέτης, για παράδειγμα λόγω προγραμματισμένης μεταφοράς σε νέα πτέρυγα,
2. Συμμετοχή σε άλλα επεμβατικά ερευνητικά έργα IPC που ενδέχεται να επηρεάσουν άμεσα την επέμβαση ή την έκβαση της μελέτης.

Κατόπιν αυτών, το Επιστημονικό Συμβούλιο ενέκρινε ομόφωνα τη διεξαγωγή της ανωτέρω μελέτης καθώς αυτή πληροί τις προϋποθέσεις Ιατρικής και Ηθικής Δεοντολογίας και δεν επιβαρύνει τον προϋπολογισμό του Νοσοκομείου μας.

#### Επισημαίνεται:

*Η κύρια ερευνήτρια της μελέτης στο πλαίσιο του απορρήτου και της ιατρικής δεοντολογίας καλείται να καταθέσει στη Γραμματεία του Επιστημονικού και Διοικητικού Συμβουλίου ανακοινώσεις ή δημοσιεύσεις σε Συνέδρια και επιστημονικά περιοδικά που θα προκύψουν από τη διεξαγωγή της μελέτης.*

3. Ότι κατά τη διεξαγωγή της μελέτης θα διασφαλιστεί η ανωνυμία και η προστασία των προσωπικών δεδομένων των συμμετεχόντων σύμφωνα με τον Γενικό Κανονισμό Προστασίας Δεδομένων (GDPR), η χρήση των στοιχείων θα γίνει μόνο για ερευνητικούς σκοπούς και δε θα υπάρξει καμία οικονομική επιβάρυνση για το Νοσοκομείο.

Διαβιβάζεται η παρούσα πολυκεντρική, μη παρεμβατική μελέτη και παρακαλούμε όπως αποφασίσετε σχετικά με:

#### *Την έγκριση:*

- διεξαγωγής της κλινικής μελέτης με τίτλο: «Βελτιστοποίηση φροντίδας τύπου «καγκουρό» για μείωση των σοβαρών περιστατικών λοιμώξεων/σηψαιμίας των νεογνών και ανθεκτικού βακτηριακού αποικισμού σε βρέφη που διατρέχουν υψηλό κίνδυνο και βρίσκονται σε μονάδα εντατικής θεραπείας νεογνών: μια πραγματιστική, πολυκεντρική, παράλληλης συστοιχίας, τυχαιοποιημένη, υβριδική μελέτη εφαρμογής – αποτελεσματικότητας», που κατέθεσε η κα Τσολιά Μαρία, Καθηγήτρια Παιδίατρος – Λοιμωξιολόγος, Διευθύντρια της Β' Π.Π.Κ του ΕΚΠΑ, καθώς αυτή πληροί τις προϋποθέσεις Ιατρικής και Ηθικής Δεοντολογίας και δεν επιβαρύνει τον προϋπολογισμό του Νοσοκομείου.

- ανάρτησης της Απόφασης στη ΔΙΑΥΓΕΙΑ
- γνωστοποίησης των αποτελεσμάτων της μελέτης στο Διοικητικό Συμβούλιο.

Και μετά από διαλογική συζήτηση το Συμβούλιο ομόφωνα

### Α Π Ο Φ Α Σ Ι Ζ Ε Ι

Την έγκριση :

1. Διεξαγωγής της κλινικής μελέτης με τίτλο: «Βελτιστοποίηση φροντίδας τύπου «καγκουρό» για μείωση των σοβαρών περιστατικών λοιμώξεων/σηψαιμίας των νεογνών και ανθεκτικού βακτηριακού αποικισμού σε βρέφη που διατρέχουν υψηλό κίνδυνο και βρίσκονται σε μονάδα εντατικής θεραπείας νεογνών: μια πραγματιστική, πολυκεντρική, παράλληλης συστοιχίας, τυχαιοποιημένη, υβριδική μελέτη εφαρμογής – αποτελεσματικότητας», που κατέθεσε η κα Τσολιά Μαρία, Καθηγήτρια Παιδίατρος – Λοιμωξιολόγος, Διευθύντρια της Β' Π.Π.Κ του ΕΚΠΑ, καθώς αυτή πληροί τις προϋποθέσεις Ιατρικής και Ηθικής Δεοντολογίας και δεν επιβαρύνει τον προϋπολογισμό του Νοσοκομείου.
2. Ανάρτησης της Απόφασης στη ΔΙΑΥΓΕΙΑ.
3. Γνωστοποίησης των αποτελεσμάτων της μελέτης στο Διοικητικό Συμβούλιο.

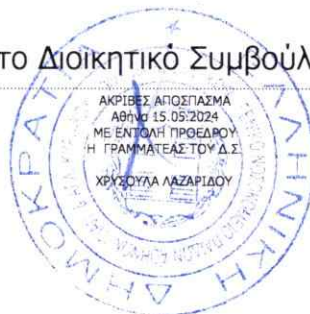

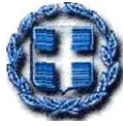

HELLENIC REPUBLIC MINISTRY OF  
HEALTH  
3rd HEALTH REGION ATTIKHZ  
GENERAL HOSPITAL OF ATHENS  
"PAN. 8i AGLAIA KYRIAKOU"  
N.P.D.D.

FPAMMATEIA AIOIKHTIKOY  
SYMV()YLOY

Athens/[] 15.05.2024

**To**

30/05/2024  
11035

TO: THE DIRECTORATE OF AIOIKHTIKHZ  
SERVICE

### AIABIBAZTIKO

We are sending you an excerpt from the minutes of the Administrative Council meeting held on 15.05.2024. ITEM 14: Approval of the **Neo-Deco** clinical study entitled: "Optimization of kangaroo care to reduce serious neonatal infections and **sepsis**" Km **uveslmkofi Bax'rnpluxofi unomlouob** in high-risk infants and **Bpioxowm** in monotherapy **vsovvcbv**: a prospective, multicenter, par|:«**outrronxiuq**, ...chaiopoimene, hybrid ...study adaptation - ...effectiveness",

The first statement was made by Ms. Maria Tsoleii, Professor of Pediatrics - Infectious Diseases, Director of the Second Department of Pediatrics at the National and Kapodistrian University of Athens, and we are grateful to you for your efforts.

WITH THE PRESIDENT  
The Secretary of the Board of Directors

Mysouila Lazaridou

In  
NPAIDON ...P&A KYRIAKOU'  
Mar.... : 11035  
May/Nil 30/05/2024

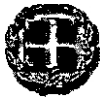

HELLENIC REPUBLIC MINISTRY OF  
HEALTH  
1<sup>st</sup> HEALTH REGION A'ITIKHZ GENERAL  
HOSPITAL HAIASIN ABHNQN  
"PAN. 8i.M... KYPIAKOY"  
N.I1.A.A-

PR;€\I(T1)/(011" 2')\EDR.G»42\!S

Athens, on the 15th day of May 2024, at 3:00 p.m., the Hospital's Administrative & Financial Committee met in its conference room, o-ro men's KTiplo TOU Hospital, in ... practical meeting the New Administrative & Board, nou formed I]... with number F4B/14427/15.03.2022, **CD.E.K.** 233/23.03.2022, TEL'JXOC Y.O.D.D., Ref. No.: 30621/ 27.05.2022, F.E.K. \*156/O3.(.)6.2022, Y.O.D.D. and I'4B/38088/10.08.2022 F.E.K. 726/12.08.2022, Y.O.D.D. ...decisions of Ynoupyofj Health K. Athanasios ...έύρη and Deputy Ynoupyob K. Asimina Psoga

The following persons attended the meeting and were legally present: Mrakipou:

...present were K. K.:

|                          |                  |
|--------------------------|------------------|
| EMMANOUIL PAPASAVVAS     | President Vice-  |
| KSININOi TOYTOYZAZ       | President Member |
| MAPIOI'KA OPAI'KAKH      | ...los           |
| ATHANASIOS BINIS ifIANNA | Mlos             |
| SAPOUNTZI ANDREAS        | Memb             |
| TOSKIΛΣ AGGELIKI NIKΑ    | er               |
| <b>ANNA DIMITROU</b>     | Mlos             |
| Musa K.:                 | Memb             |
|                          | er               |

CHRYSOULA NIKOLOPOULOU

Member

At the meeting attended and ncpéom as psamatteas of the Council Chryssoula Lazaridou.

A quorum was achieved with the presence of (8) members of the Council.

ITEM 14: Approval of the implementation of Tnc KAlvsKfic umérnc Nee-Deco us entitled: "Optimization (Doom-fact: Tt'Jnou "kangaroo" for the reduction of serious injuries Mimoeog/spasms in infants at high risk and BoioKovral in the field of otological treatment: . . . Magataspik, ...lytegric, ...holistic osthigia, ...hybrid salt avoidance - ...effectiveness", submitted by Ms. Tsolia: Maria, Professor ...physician — AOlumEloAévoc, Associate Professor Tnc B'P.P.K of the National and Kapodistrian University of Athens.

In the &mbovili ... is submitted the ref. no.: 9577/13.05.2024 (FPAMMATEIA EFIIZTHMONIKOY COUNCIL) by DEPUTY ADMINISTRATOR K. A. TOSKA, which has as its subject:

"Taking into account:

1. Ref. no. E.S.: ω7/13.03.2024 application for approval to conduct the ... clinical trial entitled: "Optimization of the Tl'Jnou 'kangaroo' pouch to reduce serious prismatic infections/sepsis of vsoyvde and ... Thektiki'i Biriakou ...settlements in areas of high risk and located in ... areas of inadequate treatment vsoyvcbv:

a phagocytic, ...lycentric, Mroulis ostiocasia, ochaiofized, hybrid application — GI'IOTE'AEOLJGTIKÉTnTCIQ», submitted by Ms. Mopia, KaBnyr'n-pla Pediatrician - Mimologist, Head of the Second Department of Pediatrics at the University of Athens.

2. "That the Bioethics Committee ... on 5/29/2024 (Th:13) took into consideration ... the recommendation of the Ethics and Modesty Committee, onoia ... on 1/29/2024, its meeting ... recommendation of the Ethics and Monology Committee, the onoia ..... on 1/29/2024, at its meeting, approved the ...documents submitted by the above with:le'. "i'is.

M'a\n nou participate "the list:

- Polly Maria, Professor of Pediatrics — Infectious Diseases, Head of the Second Department of Pediatrics of the National and Kapodistrian University of Athens, KI'Jpla Epsuvr'n'pla for the General Hospital of Athens I'.& A. KuplaKofJ
- Mgeliki Nika, MMM... MENN
- Osandra Ptaropoulou, Head of the First Department of Neonatology
- Béoon Inno'AL'JTn, Head of the Second Department of Neonatology

NeoDeco (annual title) is a phagocytic, holocentric, homozygous phage... ...hybrid MLEI ...effectiveness - adjustment with line analysis, post-treatment period, and sequential randomization. Twenty-four intensive care units from Greece, Italy, Spain, Switzerland, and *the* United Kingdom will participate. Depending on the estimated sample size, additional centers may be opened. All centers will receive 60 days of support for the implementation of the TL'Jnou "kangaroo" care program as part of the pilot.

The pilot is marked ...': the European Union's research and innovation program Horizon 2020.

**The** population of the study: ...1'η(; articles veoyvé high risk nou yevvnobvral before and) the completion of 32 sfiéopc'zéwv gestation and are referred to as intensive care units vsoyvtbv.

The main objective of the study is to determine the effects on high-risk patients.

... YEVIOL'NTGI peril uni) pregnancy < 32 sBéouéva and ... managed in high-tech units vsoywbv nou apply &λτιστοποιημένη α>ροντίδα TL'Jnou

"kangaroo" care at the unit level, consistent with standard care in the following respects:

- . Severe infection/sepsis in newborns and/or
- . Colonization with opportunistic pathogens of interest in Myth xpc'wou

Main target of application evaluation through continuous monitoring of the application process and analysis of its results:

- . The assessment of the appropriateness, acceptance, feasibility, and maintenance of the intervention related to contact &:rma with a carriage for &lt;i>iatized care of the "kangaroo"
- The assessment of implementation strategies related to ... suitability, acceptance, appropriateness, and maintenance.
- Identification of facilitating and deterring factors in the implementation of skin-to-skin contact for optimized "kangaroo" care

The aim of the health-economic evaluation is to assess the effectiveness of optimized kangaroo care and the feasibility of its implementation.

The duration of the study is 17 months for each participant undergoing single-arm treatment, with a total study duration of 20 months.

#### CRITERIA FOR INCLUSION OF STUDY CENTERS

1. European single-unit treatment vaoyvcbv nou nupéxouv routine care in premature infants (gestational age < 28 weeks),

2. Number 12 offer the highest level of intensive care (5as vsouvmv,
3. Availability of access to temperature freezing at -70 to -80°C for storage research findings,
4. Willingness to apply &λτιστοποιημένης φοντίδος Τflνου «καγκουρό» σε Μρίπτω...ση departure from the intervention group,
5. Commitment to the Mrochi of the most reliable Mamennomeni &orkia-atou or a 50% increase, in case nou the monoda of atatic treatment veoyvdw already offers the elochia ...expected target, in case of departure to a member of the intervention,
6. l'Ipsoromacia for NeolPC supervision implementation,
7. Adequate resources and expertise and decisions by the Research Methodology Committees, as appropriate.

ΚΡΙΤΗΡΙΑ EXCLUSION OF CENTER MEMBER: "GES

1. The single dose of veoyvcbv therapy is already applied "long-term" StSC > 18 hours. Significant ... expected delays in pressure from colonization by otic Miseria during the MleGis period, for Mrodi due to planned ototomy in a new wing,
2. &participation in ...invasive vocal projects IPC nou may affect the outcome of the study.

In view of the above, T0 Emo-rnpovmc') ZuuBot'JAlo unanimously approved the conduct of the above study, as it meets the requirements of Medical and Ethical Modesty and does not burden the budget of our No'ooxopsiou.

Signature:

**Kip/a** researcher of the mystery? Ma|'s|a TOU confidentiality ka| as Mtr|k MM»... "Me/ta va Karaeéagl UTf/ l"ram,i|at|:'|27 TOU 57|atema/|kao o| psO|kipkaa' &|mba||Oa ai/i7|(o|i/a3ae|s|7 &maeuse|s in Conferences Kal enlarfpoV/Kd [75,0105|e nou will psakypse|/ and Tr] **MMM/7 Mai/Meta?**

3. That during the conduct of the survey, the anonymity and confidentiality of personal data of participants will be ensured in accordance with the General Data Protection Regulation (GDPR), the data will be used for research purposes only, and there will be no financial burden on the Hospital.

Submitted polycentric, non interventional ...study and please as ...decide on a shock absorber with:

*Tr/v ends]:*

... conducting the ...victory parade entitled: "Vatitization of the kangaroo type "kangaroo" for the reduction of serious MRSA infections/sepsis in vsouvvdw and ... positive Bacterial colonization in infants nou 6|anéxouv high risk and Miskotane in an intensive care unit: a phagocytic, ...lycentric, Marilli egg wall, randomized, hybrid application — ...effectiveness>>, submitted by Ms. Maria Tsolia, Professor of Pediatrics - Infectious Diseases, MMM... of the Second Department of Pediatrics of the National and Kapodistrian University of Athens, as it meets the requirements of Medical and Ethical Modulation and does not burden the hospital's budget.

- Posting of the Decision on AIAYI'EIA
- Notification of the results of the study to the Board of Directors.

Kcu uETé more dialogue discussion To Z'UUBOONO

lighthouse)... DECIDES

The approval:

1. The conduct of the study entitled: "Optimization of 'kangaroo' care to reduce serious infectious complications/sepsis in vsoyvcbv and ... positive ...settlements in infants nou 6|0Tpéxouv high risk and BpioKowal &: onada atatic treatment veoyvdov: [JICI npaypoflo-rmfí, noAUKEVTpmr'], nadenAnq ωατοιχίας, randomized, hybrid treatment - ...effectiveness", submitted by Ms. Tsolio Mapia, Professor ...physician - Mimologist, Head of the Second Department of Psychiatry at the University of Athens, as it meets the requirements of Medical and Ethical Methodology and does not burden the hospital's budget.
2. Mortisation of the Decision by DIAVGΕΙΑ.
3. Notification of the results of the vote to: Administrative Council.

IBEX  
3h 10 1  
N20A  
Hey! M... floor Y..  
the... i. the" ...v...'  
x.....X...Xx - "....." /57"(!  
n, x07 /

**Greece**

Papageorgiou Hospital

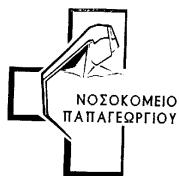

ΓΕΝΙΚΟ ΝΟΣΟΚΟΜΕΙΟ  
«ΠΑΠΑΓΕΩΡΓΙΟΥ»  
ΕΠΙΣΤΗΜΟΝΙΚΟ ΣΥΜΒΟΥΛΙΟ

### ΣΥΝΕΔΡΙΑΣΗ 382<sup>η</sup>

Σήμερα, την **15<sup>η</sup>-05-2024**, ημέρα **Τετάρτη** και ώρα **13:00** μετά μεσημβρίας, στην αίθουσα του Επιστημονικού Συμβουλίου του Νοσοκομείου, κατόπιν προσκλήσεως του Προέδρου του Ε.Σ., συνήλθαν τα παρακάτω μέλη του Ε.Σ. :

Παρόντες:

|   |                         |                                        |          |
|---|-------------------------|----------------------------------------|----------|
| 1 | Γκριμπίζης Γρηγόριος    | Καθηγητής Μαιευτικής-<br>Γυναικολογίας | Πρόεδρος |
| 2 | Φαρμάκης Δημήτριος      | Διευθυντής Καρδιολογίας                | Μέλος    |
| 3 | Σαχπεκίδης Βασίλειος    | Επιμ. Α΄ Καρδιολογίας                  | Μέλος    |
| 4 | Αντωνίου Σταύρος        | Επιμ. Β΄ Χειρουργικής                  | Μέλος    |
| 5 | Φλώρου Μαρία            | Ειδικευόμενη Παιδοχειρουργικής         | Μέλος    |
| 6 | Περσίδου Ελευθερία      | ΠΕ Διευθύντρια Φαρμακείου              | Μέλος    |
| 7 | Τσιβίκη Αναστασία       | Νοσηλεύτρια ΠΕ                         | Μέλος    |
| 8 | Τζουανοπούλου Νικολίτσα | ΤΕ Εποπτιών Δημόσιας Υγείας            | Μέλος    |

Αφού διαπιστώθηκε απαρτία συζητήθηκαν τα παρακάτω θέματα της Ημερήσιας Διάταξης:

## ΘΕΜΑ 1<sup>ο</sup> : ΕΡΕΥΝΗΤΙΚΑ ΠΡΩΤΟΚΟΛΛΑ

**ΘΕΜΑ 1.1<sup>ο</sup>:** Έγκριση διεξαγωγής προοπτικής μελέτης παρατήρησης με τίτλο: «Βελτιστοποίηση της φροντίδας “καγκουρό” για τη μείωση της νεογνικής σοβαρής λοίμωξης/σήψης και του ανθεκτικού βακτηριακού αποικισμού μεταξύ βρεφών υψηλού κινδύνου στη Μονάδα Εντατικής Νοσηλείας Νεογνών: μια πραγματιστική, πολυκεντρική, παράλληλη τυχαιοποιημένη μελέτη υβριδικής εφαρμογής-αποτελεσματικότητας (NeoDeco)» στη Β΄ Νεογνολογική Κλινική και ΜΕΝΝ Α.Π.Θ. του Νοσοκομείου

Το Ε.Σ. αφού έλαβε υπ’ όψιν του το υπ’ αριθ. πρωτ. 4714/16-02-2024 έγγραφο του κου Τσακαλίδη Χρήστου, Καθηγητή Νεογνολογίας, Διευθυντή της Β΄ Νεογνολογικής Κλινικής και ΜΕΝΝ Α.Π.Θ. του Νοσοκομείου μας, σχετικά με την έγκριση διεξαγωγής προοπτικής μελέτης παρατήρησης με τίτλο: «**Βελτιστοποίηση της φροντίδας “καγκουρό” για τη μείωση της νεογνικής σοβαρής λοίμωξης/σήψης και του ανθεκτικού βακτηριακού αποικισμού μεταξύ βρεφών υψηλού κινδύνου στη Μονάδα Εντατικής Νοσηλείας Νεογνών: μια πραγματιστική, πολυκεντρική, παράλληλη τυχαιοποιημένη μελέτη υβριδικής εφαρμογής-αποτελεσματικότητας (NeoDeco)**» και με **Κωδικό Αναφοράς: 2024-B2015-332** με κύριο ερευνητή τον κο Μητσιάκο Γεώργιο, Καθηγητή Παιδιατρικής-Νεογνολογίας,

ομόφωνα γνωμοδοτεί

Υπέρ της έγκρισης διεξαγωγής προοπτικής μελέτης παρατήρησης με τίτλο: «**Βελτιστοποίηση της φροντίδας “καγκουρό” για τη μείωση της νεογνικής σοβαρής λοίμωξης/σήψης και του ανθεκτικού βακτηριακού αποικισμού μεταξύ βρεφών υψηλού κινδύνου στη Μονάδα Εντατικής Νοσηλείας Νεογνών: μια πραγματιστική, πολυκεντρική, παράλληλη τυχαιοποιημένη μελέτη υβριδικής εφαρμογής-αποτελεσματικότητας (NeoDeco)**» και με **Κωδικό Αναφοράς: 2024-B2015-332** με κύριο ερευνητή τον κο Μητσιάκο Γεώργιο, Καθηγητή Παιδιατρικής-Νεογνολογίας, και εισηγείται την έγκριση των κάτωθι:

- Η κλινική μελέτη θα διεξαχθεί στη Β΄ Νεογνολογική Κλινική και Β΄ ΜΕΝΝ Α.Π.Θ.
- Κύριος ερευνητής είναι ο κος Μητσιάκος Γεώργιος, Καθηγητής Παιδιατρικής-Νεογνολογίας
- Η κλινική στελεχώνεται από 9 ειδικούς ιατρούς.

Το Ε.Σ. εγκρίνει τον σκοπό και τους στόχους της μελέτης, όπως περιγράφονται αναλυτικά από τον αιτούντα.

Ο αιτών δηλώνει τα κάτωθι:

- Σκοπός της μελέτης αποτελεί ο προσδιορισμός των επιπτώσεων σε νεογνά υψηλού κινδύνου που γεννιούνται μετά από διάρκεια κύησης < 32 εβδομάδων και νοσηλεύονται σε υψηλής τεχνολογίας μονάδες εντατικής νοσηλείας νεογνών, οι οποίες εφαρμόζουν βελτιστοποιημένη φροντίδα τύπου «καγκουρό» σε επίπεδο μονάδας, συγκριτικά με την τυπική περίθαλψη ως προς τα εξής:
  - ✓ σοβαρή λοίμωξη/σηψαιμία νεογνών ή/και
  - ✓ αποικισμός με ανθεκτικά βακτήρια σε βάθος χρόνου
- Δεδομένου ότι η επίπτωση της βελτιστοποιημένης φροντίδας τύπου «καγκουρό» είναι πιθανότερο να έχει σημασία για τις λοιμώξεις/τον αποικισμό που προκύπτουν κατά τη

διάρκεια της νοσηλείας στη MENN, οι νοσοκομειακές λοιμώξεις έχουν ενδιαφέρον για τη μελέτη.

- Για τη διευκόλυνση της μικροβιολογικής αξιολόγησης πολλών δειγμάτων, η παρουσία συγκεκριμένων γονιδίων ανθεκτικότητας θα θεωρηθεί ενδεικτική αποικισμού με ανθεκτικά βακτήρια.
- Ο Κύριος στόχος αξιολόγησης της εφαρμογής είναι, μέσω συνεχόμενης παρακολούθησης της διαδικασίας εφαρμογής και ανάλυσης των εκβάσεων εφαρμογής, να γίνει:
  - ✓ Η αξιολόγηση της πιστότητας, της αποδοχής, της σκοπιμότητας και της διατήρησης της επέμβασης σχετικά με την επαφή δέρμα με δέρμα για βελτιστοποιημένη φροντίδα τύπου «καγκουρό»,
  - ✓ Η αξιολόγηση στρατηγικών εφαρμογής σχετικά με την πιστότητα, την αποδοχή, τη σκοπιμότητα και τη διατήρηση,
  - ✓ Ο εντοπισμός παραγόντων διευκόλυνσης και αποτρεπτικών παραγόντων στην εφαρμογή επαφής δέρμα με δέρμα για βελτιστοποιημένη φροντίδα τύπου «καγκουρό»
- Η μελέτη επιχορηγείται από Fondazione Penta ETS (Penta) Πρόγραμμα έρευνας και καινοτομίας Ευρωπαϊκής Ένωσης Horizon 2020.
- Τα μέλη της ομάδας έργου είναι τα εξής:
  - ✓ Κύριος ερευνητής είναι ο κος Γεώργιος Μητσιάκος, Καθηγητής Παιδιατρικής Νεογνολογίας Α.Π.Θ. με ποσοστό συμμετοχής 2%
  - ✓ Συνερευνητρια είναι η κα Γιαλαμπρίνου Δήμητρα, Επικουρική Επιμελήτρια – Παιδίατρος Νεογνολόγος με ποσοστό συμμετοχής 2%.
- Ο κύριος ερευνητής και οι συνεργάτες του έχουν την εμπειρία, την εξειδίκευση και τη δυνατότητα διεξαγωγής της μελέτης.
- Προτεινόμενη διάρκεια της μελέτης: Έναρξη: Απρίλιος 2024 Λήξη: Δεκέμβριος 2025 Διάρκεια: 17 μήνες
- Ο μέγιστος αριθμός νεογνών που θα ενταχθούν στη συγκεκριμένη μελέτη είναι 50.
- Το νοσοκομείο διαθέτει τον απαραίτητο αριθμό νεογνών από τα οποία θα επιλεγούν τα κατάλληλα για συμμετοχή στη μελέτη.
- Το νοσοκομείο διαθέτει την υλικοτεχνική υποδομή που προβλέπεται από το πρωτόκολλο της μελέτης, ώστε να παρέχει τη δυνατότητα διεξαγωγής και ολοκλήρωσης της μελέτης.
- Δεν υπάρχει οικονομική επιβάρυνση του νοσοκομείου από τη διεξαγωγή της μελέτης.
- Τι μέτρα θα ληφθούν ώστε να διασφαλιστεί η εμπιστευτικότητα των προσωπικών δεδομένων; Τα ερευνητικά δεδομένα θα αποθηκευτούν σε βάση δεδομένων σε ηλεκτρονικό υπολογιστή και οι συμμετέχοντες θα εμφανίζονται με τον προσωπικό τους αριθμό μόνο. Η αντιστοιχία μεταξύ αυτού του αριθμού και των προσωπικών στοιχείων του κάθε συμμετέχοντος θα διατηρείται σε ξεχωριστό αρχείο το οποίο θα φυλάσσεται από τον κύριο ερευνητή.

Για το σκοπό της έγκρισης, ο ερευνητής καταθέτει, έντυπα και ηλεκτρονικά, τα σχετικά έγγραφα, τα οποία εγκρίνονται:

- Επιστολή κατάθεσης
- Υπεύθυνη Δήλωση Ερευνητή για τις εργαστηριακές εξετάσεις και ενδονοσοκομειακό παραπαιεμπτικό χρέωσης κλινικών και παρακλινικών εξετάσεων
- Συνοδευτική επιστολή Neo Deco
- Πρωτόκολλο (σύνοψη στα ελληνικά και στα αγγλικά)
- Ειδοποίηση απορρήτου και συγκατάθεση για επεξεργασία δεδομένων
- Έντυπα ενημέρωσης – συγκατάθεσης ασθενούς
- Ασφαλιστήριο συμβόλαιο

Αποτελεί ευθύνη του ερευνητή η τήρηση της κείμενης νομοθεσίας σχετικά με την ενημέρωση / εξασφάλιση αδειών από Εθνική Επιτροπή Δεοντολογίας, Ε.Ο.Φ., Αρχή Προστασίας Δεδομένων Προσωπικού Χαρακτήρα ή ό,τι άλλο κατά περίπτωση απαιτείται.

Επειδή δεν υπάρχει άλλο θέμα για συζήτηση λύεται η συνεδρίαση.  
Αφού συντάχθηκε το παρόν πρακτικό υπογράφεται ως ακολούθως:

Ο Πρόεδρος

Γκριμπίζης Γρηγόριος

Η Γραμματέας

  
ΚΑΡΑΪΣΚΟΥ ΓΕΩΡΓΙΑ

Καραϊσκού Γεωργία

Τα Μέλη:

Φαρμάκης Δημήτριος

Σαχπεκίδης Βασίλειος

Αντωνίου Σταύρος

Περσίδου Ελευθερία

Φλώρου Μαρία

Τσιβίκη Αναστασία

Τζουανοπούλου Νικολίτσα

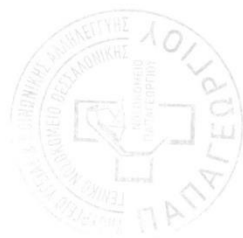

ΕΛΛΗΝΙΚΟ ΚΤΗΝΙΑΤΡΙΚΟ ΣΥΜΒΟΥΛΙΟ  
ΑΠΟΣΠΑΣΜΑ ΠΡΑΚΤΙΚΩΝ  
ΤΗΣ... 382<sup>ης</sup>... ΣΥΝΕΔΡΙΑΣΗΣ Ε.Σ.  
ΘΕΣΣΑΛΟΝΙΚΗ... 15-05-2024  
Η ΓΡΑΜΜΑΤΕΑΣ ΤΟΥ Ε.Σ.

ΕΣ 382<sup>η</sup>/15-05-2024

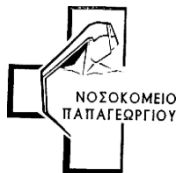

GENERAL HOSPITAL  
"PAPAGEORGIU" SCIENTIFIC  
COUNCIL

**MEETING 382<sup>th</sup>**

Today, on **15<sup>th</sup> -05-2024, Wednesday** at **13:00** after noon, in the Scientific Council room of the Hospital, following an invitation by the President of the Scientific Council, the following members of the Scientific Council met:

Present

|   |                         |                                        |           |
|---|-------------------------|----------------------------------------|-----------|
| 1 | Grimbizis Grigorios     | Professor of Obstetrics-<br>Gynecology | President |
| 2 | Dimitrios Farmakis      | Director of Cardiology                 | Member    |
| 3 | Sahpekidis Vasileios    | Head of Cardiology                     | Member    |
| 4 | Stavros Antoniou        | Head of Second Surgery<br>Department   | Member    |
| 5 | Florou Maria            | Pediatric Surgery Resident             | Member    |
| 6 | Persidou Eleftheria     | PE Pharmacy Director                   | Member    |
| 7 | Tsiviki Anastasia       | Nurse PE                               | Member    |
| 8 | Tzouanopoulou Nikolitsa | Public Health Supervisor               | Member    |

Once a quorum was established, the following items on the agenda were discussed:

## ITEM 1<sup>o</sup> : RESEARCH PROTOCOLS

**TOPIC 1.1<sup>o</sup>: Approval of prospective study observation with title:**

**"Optimization of kangaroo care to reduce neonatal severe infection/sepsis and resistant bacterial colonization among high-risk infants in the Neonatal Intensive Care Unit: a pragmatic, multicenter, parallel randomized hybrid implementation-effectiveness study (NeoDeco)" at the Second Neonatology Clinic and NICU of Aristotle University of Thessaloniki Hospital**

The Executive Committee, having taken into consideration document no. 4714/16-02-2024 from Mr. Christos Tsakalidis, Professor of Neonatology. Director of the Second Neonatology Clinic and NICU of Aristotle University of Thessaloniki at our Hospital, regarding the approval of a prospective observational study entitled: **"Optimization of kangaroo care to reduce severe neonatal infection/sepsis and resistant bacterial colonization among high-risk infants in the Neonatal Intensive Care Unit: a pragmatic, multicenter, parallel randomized hybrid implementation-effectiveness study (NeoDeco)"** and with **Reference Code: 2024-B2015-332**, with Mr. Mitsiakos Georgios, Professor of Pediatrics-Neonatology, as the principal investigator,

unanimously recommends

In favor of approving the conduct of a prospective observational study entitled: **"Optimization of kangaroo care to reduce severe neonatal infection/sepsis and resistant bacterial colonization among high-risk infants in the Neonatal Intensive Care Unit: a pragmatic, multicenter, parallel randomized hybrid implementation-effectiveness study (NeoDeco)"** and with **Reference Code: 2024-B2015-332**, with Mr. Mitsiakos Georgios, Professor of Pediatrics-Neonatology, as the principal investigator, and recommends the approval of the following:

- The clinical study will be conducted at the Second Neonatology Clinic and Second Neonatal Intensive Care Unit of Aristotle University of Thessaloniki.
- Principal investigator is the Mr. Mitsios Georgios, Professor of Pediatrics-Neonatology
- The clinic is staffed by nine specialist physicians.

The Ethics Committee approves the purpose and objectives of the study, as described in detail by the applicant.

The applicant states the following:

- The purpose of the study is to determine the effects on high-risk newborns born after < 32 weeks of gestation and treated in high-tech neonatal intensive care units which implement optimized kangaroo care at the unit level, compared to standard care in terms of the following:
  - ✓ severe infection/sepsis in newborns and/or
  - ✓ colonization with resistant bacteria over time
- Given that the impact of optimized kangaroo care is more likely to be relevant to infections/colonization occurring during

the course of hospitalization in the NICU, hospital-acquired infections are of interest for the study.

- To facilitate the microbiological evaluation of multiple samples, the presence of specific resistance genes will be considered indicative of colonization with resistant bacteria.
- The main objective of the implementation evaluation is, through continuous monitoring of the implementation process and analysis of the implementation outcomes, to:
  - ✓ The evaluation of the fidelity, acceptance, feasibility, and sustainability of the intervention regarding skin-to-skin contact for optimized kangaroo care.
  - ✓ To evaluate implementation strategies in terms of fidelity, acceptance, feasibility, and sustainability.
  - ✓ Identify facilitators and barriers to the implementation of skin-to-skin contact for optimized kangaroo care.
- The study is funded by Fondazione Penta ETS (Penta) European Union Horizon 2020 Research and Innovation Program.
- The members of the project team are as follows:
  - ✓ The principal investigator is Mr. Georgios Mitsiakos, Professor of Pediatric Neonatology at Aristotle University of Thessaloniki, with a 2% participation rate.
  - ✓ The co-investigator is Ms. Dimitra Gialabrinou, Assistant Professor – Pediatric Neonatologist, with a 2% participation rate.
- The principal investigator and his colleagues have the experience, expertise, and capacity to conduct the study.
- Proposed duration of the study:                      Start: April 2024                      End: December 2025  
Duration: 17 months
- The maximum number of newborns to be included in this study is 50.
- The hospital has the necessary number of newborns from which those suitable for participation in the study will be selected.
- The hospital has the material and technical infrastructure required by the study protocol to enable the study to be conducted and completed.
- There is no financial burden on the hospital for conducting the study.
- What measures will be taken to ensure the confidentiality of personal data? The research data will be stored in a computer database and participants will be identified only by their personal number. The correspondence between this number and the personal details of each participant will be kept in a separate file, which will be kept by the principal investigator.

For the purpose of approval, the researcher submits, in print and electronically, the relevant documents, which are approved:

- Letter of submission
- Researcher's Affidavit for laboratory tests and in-hospital referral for clinical and paraclinical tests
- Accompanying letter from Neo Deco
- Protocol (summary in Greek and English)
- Confidentiality notice and consent for data processing
- Patient information and consent forms
- Insurance contract

It is the researcher's responsibility to comply with current legislation regarding information/obtaining permits from the National Ethics Committee, the National Organization for Medicines, the Personal Data Protection Authority, or any other authority as required.

Επιχειρηστική Δράση ΠΧ\* ο έργο ΟΙΟ ΟΥΓΓΕΤΕΟα άύcrai q ουνεβρίαα.  
Αφού Ουνρόχεαε ίο Τροπόν Τροχίiró uzρογρόθΕίαi ulç axoΑού0ζα:

Ο ΝρόΕΘ|00ζ

Γκριμπίζης Γρηγόριος

Η Φροπρα ζος



Καραϊσκου Γεωργία

Το ΜζΧα:

Ραυα\*\*ns Αrλrčí ριοç

Zo cxiöçç ΒαοιάΕιοç

ΑΥτэдvίου ζΤΟΥιδΟç

ΦΕραίδου ΕàΕυεΕριο

ØÉΝρου Μαριο

Τοίξίχα Αναοροοία

ΤξουονοζρούΧου Νιχοάίιο

ΕΠΙΣΤΗΜΟΝΙΚΟ ΖΥΜΘΥΑΙΦ  
ΑΠΟΣΠΑΣΜΑ ΠΡΑΚΤΙΚΩΝ  
ΤΗΣ 382<sup>ns</sup>  
ΘΕΣΣΑΛΟΝΙΚΗ 15-05-2024  
Η ΓΡΑΜΜΑΤΕΑΣ ΤΟΥ Ε

EZ 382/IN-05—2024

**ΑΡΙΘΜΟΣ ΣΥΝΕΔΡΙΑΣΗΣ 682**

Σήμερα την 30<sup>η</sup> Μαΐου 2024, ημέρα Πέμπτη και ώρα 13:00, στα γραφεία του Γενικού Νοσοκομείου ΠΑΠΑΓΕΩΡΓΙΟΥ συνήλθαν τα παρακάτω μέλη του Δ.Σ. αυτού, σε έκτακτη συνεδρίαση μετά από πρόσκληση του Προέδρου του Δ.Σ.:

1. Μιχαήλ Καραβιώτης
2. Γρίβα Βασιλική
3. Παναγιώτης Βλάχος
4. Απόστολος Αθανασιάδης
5. Χρήστος Παπάς
6. Μαρία Σαρηγιαννίδου

Λόγω κωλύματος δεν παρέστη ο κ. Δημήτριος Ματάμης ο οποίος εξουσιοδότησε τον κ. Πρόεδρο για να τον αντιπροσωπεύσει στη συνεδρίαση και να ψηφίσει αντ' αυτού επί κάθε ζητήματος που θα τεθεί προς ψήφιση.

Προ της έναρξης της συνεδρίασης το Σωματείο Εργαζομένων του Νοσοκομείου πραγματοποίησε παράσταση και παρέδωσε υπόμνημα σχετικά με το θέμα 4 της Συνεδρίασης.

Επίσης παρέστησαν οι κ.κ. Ζαχαρούδη Βαρσαμούλα και Ευαγγελία Μουλά ως γραμματείς.

Αφού διαπιστώθηκε απαρτία, συζητήθηκαν τα παρακάτω θέματα:

- 1.
2. Θέματα Επιστημονικού Συμβουλίου.

2.1 Διεξαγωγή προοπτικής μελέτης παρατήρησης με τίτλο: «Βελτιστοποίηση της φροντίδας “καγκουρό” για τη μείωση της νεογνικής σοβαρής λοίμωξης/σήψης και του ανθεκτικού βακτηριακού αποικισμού μεταξύ βρεφών υψηλού κινδύνου στη Μονάδα Εντατικής Νοσηλείας Νεογνών: μια πραγματιστική, πολυκεντρική, παράλληλη τυχαιοποιημένη μελέτη υβριδικής εφαρμογής - αποτελεσματικότητας (NeoDeco)» στη Β' Νεογνολογική Κλινική και ΜΕΝΝ Α.Π.Θ. του Νοσοκομείου.

11.

## **Θέμα 2<sup>ο</sup>: Θέματα Επιστημονικού Συμβουλίου.**

**Θέμα 2.1: Διεξαγωγή προοπτικής μελέτης παρατήρησης με τίτλο: «Βελτιστοποίηση της φροντίδας “καγκουρό” για τη μείωση της νεογνικής σοβαρής λοίμωξης/σήψης και του ανθεκτικού βακτηριακού αποικισμού μεταξύ βρεφών υψηλού κινδύνου στη Μονάδα Εντατικής Νοσηλείας Νεογνών: μια πραγματιστική, πολυκεντρική, παράλληλη τυχαιοποιημένη μελέτη υβριδικής εφαρμογής - αποτελεσματικότητας (NeoDeco)» στη Β΄ Νεογνολογική Κλινική και ΜΕΝΝ Α.Π.Θ. του Νοσοκομείου.**

Το Δ.Σ. αφού έλαβε υπόψη του:

1. Το υπ' αριθ. πρωτ. 12963/16-05-2024 Πρακτικό της 382<sup>ης</sup> Συνεδρίασης του Επιστημονικού Συμβουλίου (Θέμα 1<sup>ο</sup>.1), σύμφωνα με το οποίο το Επιστημονικό Συμβούλιο γνωμοδοτεί υπέρ της έγκρισης διεξαγωγής προοπτικής μελέτης παρατήρησης με τίτλο: «Βελτιστοποίηση της φροντίδας “καγκουρό” για τη μείωση της νεογνικής σοβαρής λοίμωξης/σήψης και του ανθεκτικού βακτηριακού αποικισμού μεταξύ βρεφών υψηλού κινδύνου στη Μονάδα Εντατικής Νοσηλείας Νεογνών: μια πραγματιστική, πολυκεντρική, παράλληλη τυχαιοποιημένη μελέτη υβριδικής εφαρμογής-αποτελεσματικότητας (NeoDeco)» και με Κωδικό Αναφοράς: 2024-B2015-332 στη Β΄ Νεογνολογική Κλινική και ΜΕΝΝ Α.Π.Θ. του Νοσοκομείου με κύριο ερευνητή τον κ. Γεώργιο Μητσαϊκό, Καθηγητή Παιδιατρικής-Νεογνολογίας της εν λόγω Κλινικής.

2. Το από 25-04-2024 μήνυμα ηλεκτρονικού ταχυδρομείου της Οικονομικής Υπηρεσίας, στο οποίο αναφέρεται ότι:

«Αναφορικά με τη σύμβαση της εν λόγω μελέτης, θα θέλαμε να σας γνωρίσουμε τα εξής:

Α) Από την § 9 (Προϋπολογισμός – Αμοιβές) της σύμβασης, δεν προβλέπεται επιβάρυνση του Νοσοκομείου για την τυχόν διενέργεια διαφόρων εργαστηριακών εξετάσεων/νοσηλείας κ.λ.π..

Β) Η αμοιβή του Νοσοκομείου ύψους 7.500 €, θα καταβληθούν τμηματικά από τη χορηγό εταιρεία στο Νοσοκομείο όπως ορίζεται από τη σύμβαση και από το πρόγραμμα πληρωμών».

3. Την υπ' αριθ. Α1α/8342/10-07-1998 κοινή υπουργική απόφαση των Υπουργών Οικονομικών και Υγείας και Πρόνοιας (ΦΕΚ Β΄ 711) «Έγκριση του Εσωτερικού Κανονισμού Λειτουργίας του Γενικού Περιφερειακού Νοσοκομείου Παπαγεωργίου», όπως τροποποιήθηκε, συμπληρώθηκε και ισχύει σήμερα, εκτός από εκείνα τα μέρη της υπ' αριθ. Γ2α/86652/16/5-1-2018 τροποποιητικής κοινής υπουργικής απόφασης των Υπουργών Οικονομικών και Υγείας (ΦΕΚ Β΄ 151), που ακυρώθηκαν με την αριθμ. 1500/2019 απόφαση του Συμβουλίου της Επικρατείας και που αφορούσαν (α) στην παράγραφο 16 του άρθρου 9 του αρχικού Εσωτερικού Κανονισμού Λειτουργίας και (β) στην παράγραφο 1 του άρθρου 11 του αρχικού Εσωτερικού Κανονισμού, οπότε ως προς αυτές τις δύο πρώτες διατάξεις εξακολουθεί να ισχύει ο αρχικός ΕΚΛ [ΚΥΑ Α1α/ 8342/1998 (ΦΕΚ Β΄ 711)], όπως κατά καιρούς έχει τροποποιηθεί, με τελευταία τροποποιητική την υπ' αριθμ. Γ2α/2183/02-05-2024 (ΦΕΚ 2781/τ.Β΄/16-05-2024)».

4. Τις διατάξεις των άρθρων 15 και 17 της από 24-05-1991 Σύμβασης μεταξύ του Ελληνικού Δημοσίου και του Ιδρύματος «Ίδρυμα Παπαγεωργίου», που κυρώθηκε με το Ν. 1964/1991 (ΦΕΚ 146/τεύχος Α΄/26-09-1991), όπως τροποποιήθηκε, συμπληρώθηκε και ισχύει σήμερα.

5. Την υπ' αριθ. Γ4β/Γ.Π. 66112/2022/22-02-2023 (ΦΕΚ 181/01-03-2023, Τεύχος Υ.Ο.Δ.Δ.) ΚΥΑ του Υπουργού Υγείας και της Αναπληρώτριας Υπουργού Υγείας περί συγκρότησης και ορισμού μελών στο Διοικητικό Συμβούλιο του Γ.Ν. «ΠΑΠΑΓΕΩΡΓΙΟΥ», αρμοδιότητας 3ης Υ.Πε. Μακεδονίας.

Ομόφωνα αποφασίζει

### **Εγκρίνει:**

1. Τη **διεξαγωγή προοπτικής μελέτης παρατήρησης με τίτλο: «Βελτιστοποίηση της φροντίδας “καγκουρό” για τη μείωση της νεογνικής σοβαρής λοίμωξης/σήψης και του ανθεκτικού βακτηριακού αποικισμού μεταξύ βρεφών υψηλού κινδύνου στη Μονάδα Εντατικής Νοσηλείας Νεογνών: μια πραγματιστική, πολυκεντρική, παράλληλη τυχαιοποιημένη μελέτη υβριδικής εφαρμογής-αποτελεσματικότητας (NeoDeco)» και με Κωδικό Αναφοράς: 2024-B2015-332 στη Β΄ Νεογνολογική Κλινική και ΜΕΝΝ Α.Π.Θ. του Νοσοκομείου με κύριο ερευνητή τον κ. Γεώργιο Μητσαϊκό, Καθηγητή Παιδιατρικής-Νεογνολογίας της εν λόγω Κλινικής.**

2. Τα **σχετικά έγγραφα** που κατατέθηκαν και εγκρίθηκαν από το Επιστημονικό Συμβούλιο του Νοσοκομείου.

Μετά από αυτό και μη υπάρχοντος άλλου θέματος προς συζήτηση έληξε η συνεδρίαση.

Ο ΠΡΟΕΔΡΟΣ

Η ΑΝΤΙΠΡΟΕΔΡΟΣ

Μιχαήλ Καραβιώτης

Βασιλική Γρίβα

ΤΑ ΜΕΛΗ

Απόστολος Αθανασιάδης

Χρήστος Παπάς

Μαρία Σαρηγιαννίδου

Παναγιώτης Βλάχος

ΟΙ ΓΡΑΜΜΑΤΕΙΣ

Ζαχαρούδη Βαρσαμούλα

Μουλά Ευαγγελία

**EXCERPT FROM THE  
MINUTES**

**MEETING NUMBER 682**

Today, on 30May 2024, at 1:00 p.m., the following members of the Board of Directors met at the offices of PAPAGEORGIOU General Hospital for an extraordinary meeting, following an invitation by the Chairman of the Board:

1. Michael Karaviotis
2. Vasiliki Griva
3. Panagiotis Vlachos
4. Apostolos Athanasiadis
5. Christos Papas
6. Maria Sarigiannidou

Due to unforeseen circumstances, Mr. Dimitrios Matamis was unable to attend and authorized the President to represent him at the meeting and vote on his behalf on any issue put to the vote.

Before the meeting began, the Hospital Employees' Union held a presentation and submitted a memorandum on item 4 of the meeting agenda.

Ms. Zacharoudi Varsamoula and Ms. Evangelia Moula were also present as secretaries. After a

quorum was established, the following issues were discussed:

- 1.
2. Issues of the Scientific Council.
  - 2.1 Conducting a prospective observational study entitled: "Optimization of kangaroo care to reduce severe neonatal infection/sepsis and resistant bacterial colonization among high-risk infants in the Neonatal Intensive Care Unit: a pragmatic, multicenter, parallel randomized hybrid implementation-effectiveness study (NeoDeco)" at the Second Neonatology Clinic and NICU of the Hospital.

11.

## Item 2<sup>o</sup> : Scientific Council Issues.

**Item 2.1: Conducting a prospective observational study entitled: "Optimization of kangaroo care to reduce severe neonatal infection/sepsis and resistant bacterial colonization among high-risk infants in the Neonatal Intensive Care Unit: a pragmatic, multicenter, parallel randomized hybrid implementation-effectiveness study (NeoDeco)" at the Second Neonatology Clinic and NICU of the Hospital.**

The Board of Directors, having taken into consideration:

1. Minutes No. 12963/16-05-2024 of the 382<sup>nd</sup> Meeting of the Scientific Council (Item 1<sup>o</sup> .1), according to which the Scientific Council recommends the approval of a prospective observational study entitled: "Optimization of kangaroo care to reduce severe neonatal infection/sepsis and resistant bacterial colonization among high-risk infants in the Neonatal Intensive Care Unit: a pragmatic, multicenter, parallel randomized hybrid implementation-effectiveness study (NeoDeco)" and with Reference Code: 2024-B2015-332 at the Second Neonatology Clinic and NICU of the Hospital, with Mr. Georgios Mitsiakos, Professor of Pediatrics-Neonatology at the Clinic, as the principal investigator.

2. The email dated 25-04-2024 from the Financial Service, which states that:

"With regard to the contract for this study, we would like to inform you of the following:

A) According to § 9 (Budget – Fees) of the contract, the Hospital will not be charged for any laboratory tests/hospitalization, etc.

B) The Hospital's fee of €7,500 will be paid in installments by the sponsoring company to the Hospital as specified in the contract and the payment schedule."

3. Joint Ministerial Decision No. A1a/8342/10-07-1998 of the Ministers of Finance and Health and Welfare (Government Gazette B' 711) "Approval of the Internal Operating Regulations of the Papageorgiou General Regional Hospital," as amended, supplemented, and currently in force, except for those parts of No. C2a/86652/16/5-1-2018 amending joint ministerial decision of the Ministers of Finance and Health (Government Gazette B' 151), which were annulled by decision no. 1500/2019 of the Council of State and which concerned (a) paragraph 16 of Article 9 of the original Internal Rules of Procedure and (b) paragraph 1 of Article 11 of the original Internal Rules of Procedure, in which case the original Internal Rules of Procedure [Joint Ministerial Decision No. A1a/ 8342/1998 (Government Gazette B' 711)], as amended from time to time, with the latest amendment being No. C2a/2183/02-05-2024 (Government Gazette 2781/B/16-05-2024).

4. The provisions of Articles 15 and 17 of the Agreement of 24-05-1991 between the Greek State and the "Papageorgiou Foundation," ratified by Law 1964/1991 (Government Gazette 146/Issue A/26-09-1991), as amended, supplemented, and currently in force.

5. No. C4b/G.P. 66112/2022/22-02-2023 (Government Gazette 181/01-03-2023, Issue Y.O.D.D.) Joint Ministerial Decision of the Minister of Health and the Deputy Minister of Health on the formation and appointment of members to the Board of Directors of the "PAPAGEORGIU" General Hospital, under the jurisdiction of the 3<sup>rd</sup> Regional Health Authority of Macedonia.

Unanimously decides

### Approves:

1. The **conduct of a prospective observational study** entitled: "**Optimization of kangaroo care to reduce severe neonatal infection/sepsis and resistant bacterial colonization among high-risk infants in the Neonatal Intensive Care Unit: a pragmatic, multicenter, parallel randomized hybrid implementation-effectiveness study (NeoDeco)**" and with Reference Code: **2024-B2015-332 at the Second Neonatology Clinic and NICU** of the Hospital, **with Mr. Georgios Mitsiakos**, Professor of Pediatrics-Neonatology at the Clinic, **as the principal investigator**.

2. The **relevant documents** were submitted and approved by the Hospital's Scientific Council.

After that, and with no other items for discussion, the meeting was adjourned. THE

CHAIR

THE VICE-CHAIR

Michael Karaviotis

Vasiliki Griva

THE MEMBERS

Apostolos Athanasiadis

Christos Papas

Maria Sarigiannidou

Panagiotis Vlachos

THE SECRETARIES

Zacharoudi Varsamoula

Moula Evangelia

**Italy**

University Hospital Policlinico Paolo Giaccone, Palermo

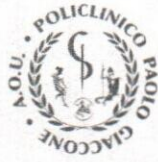

AZIENDA OSPEDALIERA UNIVERSITARIA

## Comitato Etico Locale Palermo 1

Verbale N° 14

Seduta del 06/06/2024

### OMISSIS STUDI

**11. OPTIMISING KANGAROO CARE TO REDUCE NEONATAL SEVERE INFECTION/SEPSIS AND RESISTANT BACTERIAL COLONISATION AMONG HIGH - RISK INFANTS IN NEONATAL INTENSIVE CARE A PRAGMATIC, MULTICENTRE, PARALLEL CLUSTER RANDOMISED HYBRID IMPLEMENTATION EFFECTIVENESS STUDY (NEODECO).  
PROT NEODECO**

Sperimentatore: Prof. Mario Giuffrè

Centro: UOC di Neonatologia

Sponsor: Fondazione Penta ETS

Il CEL esamina la sottoelencata documentazione ed approva all'unanimità:

- Richiesta di parere alla conduzione dello studio
- Lettera di trasmissione V1.0 20240503
- Protocollo dello studio V3.0 20240408
- Foglio Informativo e modulo di consenso informato per il genitore/legale rappresentante V1.0 20240409
- Informativa sulla Privacy e consenso al trattamento dati personali V1.0 20231013
- Lista delle variabili V2.0 20240314
- Convenzione economica V1.0 20240301
- Assicurazione V1.0 20230628
- Elenco centri partecipanti allo studio V 1.0 20230628.

Il Presidente del Comitato Etico Locale Palermo 1

Prof. M. Mezzatesta

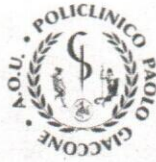

AZIENDA OSPEDALIERA UNIVERSITARIA

## Comitato Etico Locale Palermo 1

Verbale N° 14

Seduta del 06/06/2024

Il giorno 06 Giugno 2024, si è riunito il Comitato Etico Locale Palermo 1 dell'A.O.U.P. di Palermo, istituito con deliberazione n. 1017 del 19.07.2023 dell'Azienda Ospedaliera Universitaria Policlinico "Paolo Giaccone" di Palermo.

Sono presenti:

Prof. M. Mezzatesta – in qualità di clinico – Presidente  
Dott. L. Aprea – Direttore Sanitario di Presidio – Delegato dal Direttore Sanitario – in qualità di Clinico – componente  
Prof. G. Badalamenti - in qualità di clinico – componente  
Prof. M. Barbagallo - in qualità di clinico – componente  
Prof.ssa Carla Cannizzaro – in qualità di farmacologo – Vice Presidente  
Prof. C. Costantino – in qualità di biostatistico - componente  
Ing. A. D'Aquila – in qualità di esperto in dispositivi medici – componente  
Dott. L. Galvano . in qualità di medico di medicina generale territoriale - componente  
Dott. G. Montalbano – in qualità di pediatra componente esterno - componente  
Dott. M. Noto - in qualità di rappresentante dell'area delle professioni sanitarie interessata alla sperimentazione – componente  
Dott. A. Pasquale – in qualità di farmacista ospedaliero – componente  
Prof. E. Grassedonio - esperto clinico nel settore delle procedure tecniche, diagnostiche e terapeutiche, invasive e semi invasive - componente  
Dott. F. La Placa - in qualità di rappresentante delle associazioni di pazienti o di cittadini impegnati sui temi della salute – componente  
Dott. L. Sesta – in qualità di esperto di bioetica

Assenti giustificati:

Prof.ssa A. Argo – in qualità di medico legale - componente  
Dott. P. Russo – esperto in nutrizione  
Ing. M. P. Scozzaro – in qualità di ingegnere clinico - componente  
Prof. G. Stassi – esperto in genetica - componente

Segreteria Tecnica Scientifica: Responsabile STS Grazia Scalici – Collaboratori: Gabriella Donzelli – Anna Maria Leto - Gaetana Saletta – Vincenzo Gennusa

I componenti del Comitato dichiarano di astenersi dal pronunciarsi in merito a quelle sperimentazioni per le quali possa sussistere un conflitto di interessi di tipo diretto o indiretto.

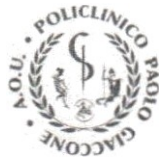

UNIVERSITY HOSPITAL COMPANY

Local Ethics Committee  
Palermo 1

Minutes No.  
14

Meeting of  
06/06/2024

OMISSIS STUDIES

11. OPTIMISING KANGAROO CARE TO REDUCE NEONATAL SEVERE INFECTION/SEPSIS AND RESISTANT BACTERIAL COLONISATION AMONG HIGH-RISK INFANTS IN NEONATAL INTENSIVE CARE: A PRAGMATIC, MULTICENTRE, PARALLEL CLUSTER RANDOMISED CONTROLLED TRIAL

Investigator: Prof. Mario Giuffrè  
Center: UOC of Neonatology  
Sponsor: Fondazione Penta ETS

D CEL examines the documentation listed below and unanimously approves:

- Request for opinion on the conduct of the study
- Cover letter VI.0 20240503
- Study protocol V3.0 20240408
- Information sheet and informed consent form for the parent/legal representative V1.0 20240409
- Privacy Policy and consent to the processing of personal data VI.0 20231013
- List of variables V2.0 20240314
- Economic agreement VI.0 20240301
- Insurance VI.0 20230628
- List of centers participating in the study V 1.0 20230628.

The Chair of the Local Ethics Committee Palermo 1  
Prof. M. Mezzaie

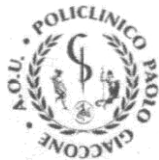

UNIVERSITY HOSPITAL COMPANY

## Local Ethics Committee Palermo 1

Minutes No.  
14

Meeting of  
06/06/2024

On June 6, 2024, the Local Ethics Committee Palermo 1 of the A.O.U.P. of Palermo, established by resolution no. 1017 of July 19, 2023, of the University Hospital Policlinico "Paolo Giaccone" of Palermo, met.

### Present:

Prof. M. Mezzatesta — in his capacity as clinician — Chairman  
Dr. L. Aprea — Presidio Medical Director — Delegate of the Medical Director — in his capacity as Clinician — member  
Prof. G Badalamenti — in his capacity as clinician — member  
Prof. M. Barbagallo — in his capacity as clinician — member  
Prof. Carla Cannizzaro — in her capacity as pharmacologist — Vice President  
Prof. C. Costantino — in his capacity as biostatistician — member  
Eng. A. D'Aquila — as an **expert** in medical devices — member  
Dr. L. Galvano, as a local general practitioner - member Dr. G Montalbano, as an external pediatrician - member  
Dr. M. Noto, representing the healthcare professions involved in the trial, member  
Dr. A. Pasquale — as a hospital pharmacist — member  
Prof. E. Grassedonio — clinical expert in the field of technical, diagnostic, and therapeutic procedures, both invasive and semi-invasive — member  
Dr. F. La Placa — as representative of patient associations or citizens involved in health issues — member  
Dr. L. Sesta — as an expert in bioethics

### Justified absences:

Prof. A. Argo - as medical examiner - member Dr. P. Russo - nutrition expert  
Eng. M. P. Scozzaro - as a clinical engineer - member Prof. G Stassi - expert in genetics - member

Technical Scientific Secretariat: Head of STS Grazia Scalici — Collaborators: Gabriella Dorizelli — Anna Maria Leto — Gaetana Paletta — Vincenzo Gennusa

The members of the Committee declare that they will refrain from commenting on those experiments for which there may be a direct or indirect conflict of interest.

**Italy**

Azienda Ospedaliera Universitaria S.Anna di Ferrara

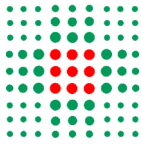

*Il Comitato Etico Area Vasta Emilia Centro della Regione Emilia-Romagna (CE-AVEC) è stato istituito con delibera regionale n. 923 del 05/06/2023  
Il CE-AVEC opera in conformità al D.M. del 26 gennaio 2023 "Individuazione di quaranta comitati etici territoriali" e al DM del 30 gennaio 2023  
"Definizione dei criteri per la composizione e il funzionamento dei comitati etici territoriali"*

Bologna, 17/10/2024

## **586/2024/Sper/AOUFe valutato nella seduta del 17/10/2024**

Dott.ssa Silvia Fanaro  
U.O. Neonatologia e T.I.N.  
AOU Ferrara  
[silvia.fanaro@unife.it](mailto:silvia.fanaro@unife.it)

Dott.ssa Federica D' Ambrosio  
Fondazione Penta ETS  
[federica.dambrosio@pentafoundation.org](mailto:federica.dambrosio@pentafoundation.org)

***Oggetto: Optimising kangaroo care to reduce neonatal severe infection/sepsis and resistant bacterial colonisation among high-risk infants in neonatal intensive care: a pragmatic, multicentre, parallel cluster randomised hybrid implementation-effectiveness study***

***Codice Protocollo: NeoDeco***

***Codice interno CE: 586/2024/Sper/AOUFe***

***Promotore: Fondazione Penta ETS (finanziamento Horizon 2020)***

***Centro Coordinatore: Azienda Ospedaliero Universitaria di Padova***

***Sperimentatore Responsabile: Dott.ssa Silvia Fanaro***

***Centro clinico: U.O. Neonatologia e T.I.N. – Azienda Ospedaliero Universitaria di Ferrara***

### Elenco della documentazione esaminata:

- 1 Lettera di trasmissione
- 2 Protocollo di studio
- 3 Sinossi
- 4 Foglio informativo e modulo di consenso informato per il genitore/legale rappresentate
- 5 Informativa sulla privacy e consenso al trattamento dei dati personali
- 6 Lista delle variabili (CRF)
- 7 Elenco centri partecipanti allo studio

**Allegato:** elenco dei componenti del Comitato Etico presenti al momento dell'espressione del presente parere

**NOTA:** per qualsiasi successiva comunicazione relativa allo studio in oggetto è indispensabile fare riferimento al codice interno CE che identifica lo studio (indicato nell'oggetto) e alla data della seduta di valutazione.

**Il presente parere è spedito dalla Segreteria Locale presso l'Azienda Ospedaliero-Universitaria di Ferrara.**

**Le comunicazioni in merito a questo parere devono essere inoltrate all'indirizzo email: [comitatoetico@ospfe.it](mailto:comitatoetico@ospfe.it)**

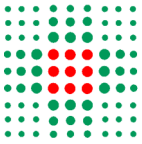

*Il Comitato Etico Area Vasta Emilia Centro della Regione Emilia-Romagna (CE-AVEC) è stato istituito con delibera regionale n. 923 del 05/06/2023  
Il CE-AVEC opera in conformità al D.M. del 26 gennaio 2023 "Individuazione di quaranta comitati etici territoriali" e al DM del 30 gennaio 2023  
"Definizione dei criteri per la composizione e il funzionamento dei comitati etici territoriali"*

- 8 *Certificato assicurativo*
- 9 *Curricula degli sperimentatori*
- 10 *Modello dichiarazione conflitto di interessi*
- 11 *Bozza di convenzione economica*
- 12 *Invitation Letter Horizon 2020*
- 13 *Modulo di fattibilità locale*
- 14 *Parere Comitato Etico del centro coordinatore*

Il Comitato Etico, nella seduta telematica del giorno 17/10/2024, esprime all'unanimità **parere favorevole** alla conduzione dello studio.

Si precisa che

- Lo studio potrà essere avviato solo dopo aver ricevuto il nulla osta da parte della Direzione Generale della struttura sanitaria di riferimento ai sensi dell'art. 7 della L.R. n. 9/2017.
- Ai fini del monitoraggio dell'andamento dello studio in oggetto, lo **Sperimentatore Responsabile** è tenuto a fornire al Comitato Etico **rapporti periodici sullo stato di avanzamento** dall'avvio dello studio fino al termine dello stesso, annualmente o più frequentemente in caso di eventi che incidano significativamente sullo svolgimento dello studio e/o aumentino il rischio per i soggetti partecipanti. A tal fine è possibile utilizzare il modulo disponibile sul sito web del Comitato Etico ([https://www.aosp.bo.it/sites/default/files/Allegati\\_ricerca/modulo\\_monitoraggio\\_ceavec.docx](https://www.aosp.bo.it/sites/default/files/Allegati_ricerca/modulo_monitoraggio_ceavec.docx)). Il modulo compilato, firmato e datato, andrà inviato esclusivamente in formato elettronico all'indirizzo e-mail dedicato [monitoraggiostudi@ospfe.it](mailto:monitoraggiostudi@ospfe.it) indicando nell'oggetto il nome del centro clinico di riferimento, il nome del relativo Sperimentatore ed il codice assegnato dal Comitato allo studio.

Cordiali saluti

Il Presidente

**Allegato:** elenco dei componenti del Comitato Etico presenti al momento dell'espressione del presente parere

**NOTA:** per qualsiasi successiva comunicazione relativa allo studio in oggetto è indispensabile fare riferimento al codice interno CE che identifica lo studio (indicato nell'oggetto) e alla data della seduta di valutazione.

**Il presente parere è spedito dalla Segreteria Locale presso l'Azienda Ospedaliero-Universitaria di Ferrara.**

**Le comunicazioni in merito a questo parere devono essere inoltrate all'indirizzo email: [comitatoetico@ospfe.it](mailto:comitatoetico@ospfe.it)**

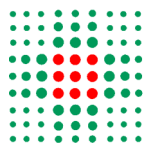

*Il Comitato Etico Area Vasta Emilia Centro della Regione Emilia-Romagna (CE-AVEC) è stato istituito con delibera regionale n. 923 del 05/06/2023  
Il CE-AVEC opera in conformità al D.M. del 26 gennaio 2023 "Individuazione di quaranta comitati etici territoriali" e al DM del 30 gennaio 2023  
"Definizione dei criteri per la composizione e il funzionamento dei comitati etici territoriali"*

**Componenti Comitato Etico Area Vasta Emilia Centro (CE-AVEC)  
Seduta telematica del 17/10/2024**

| Nome e Cognome                    | Qualifica secondo il DM 30 gennaio 2023                                                            | Struttura di appartenenza                             | Presente/ Assente |
|-----------------------------------|----------------------------------------------------------------------------------------------------|-------------------------------------------------------|-------------------|
| Elisabetta Poluzzi - Presidente   | Farmacologo                                                                                        | Università degli Studi di Bologna                     | P                 |
| Primiano Iannone - Vicepresidente | Clinico Esperto in Gastroenterologia                                                               | AUSL di Bologna                                       | A                 |
| Federica Banorri                  | Esperto in materia giuridica                                                                       | IRCCS AOU di Bologna                                  | P                 |
| Francesca Bonetti                 | Rappresentante delle Associazioni di pazienti o dei cittadini impegnati sui temi della salute      | Rappresentante di AGD, Associazione Giovani Diabetici | P                 |
| Elisabetta Cagni                  | Fisico medico                                                                                      | AUSL di Reggio Emilia                                 | P                 |
| Fausto Catena                     | Clinico Esperto in Chirurgia Generale                                                              | AUSL della Romagna                                    | P                 |
| Paolo Cristiani                   | Clinico Esperto in Ginecologia e Ostetricia                                                        | Libero professionista                                 | P                 |
| Alessandra De Palma               | Medico legale                                                                                      | IRCCS AOU di Bologna                                  | P                 |
| Danilo Di Diodoro                 | Clinico Esperto in Psichiatria                                                                     | in quiescenza                                         | P                 |
| Giuseppe Di Pasquale              | Clinico Esperto in nuove procedure tecniche, diagnostiche e terapeutiche, invasive e semi-invasive | Libero professionista                                 | P                 |
| Susanna Esposito                  | Pediatra                                                                                           | AOU di Parma                                          | P                 |
| Carla Faralli                     | Esperto in Bioetica                                                                                | Università degli Studi di Bologna                     | P                 |
| Simona Ferrari                    | Esperto in Genetica                                                                                | IRCCS AOU di Bologna                                  | A                 |
| Graziella Filippini               | Clinico Esperto in Neurologia                                                                      | In quiescenza                                         | P                 |
| Carlo Finelli                     | Clinico Esperto in Ematologia                                                                      | Libero professionista                                 | P                 |
| Lorenzo Gasperoni                 | Farmacista SSN                                                                                     | IRST "Dino Amadori" - IRCCS                           | P                 |
| Monica Guberti                    | Rappresentante dell'Area delle professioni sanitarie                                               | IRCCS – Istituto Ortopedico Rizzoli di Bologna        | P                 |
| Carlo Impallomeni                 | Clinico Esperto in Ortopedia e Traumatologia                                                       | AUSL di Imola                                         | P                 |
| Lamberto Manzoli                  | Biostatistico                                                                                      | Università degli Studi di Bologna                     | A                 |
| Gianluca Mazza                    | Esperto in materia assicurativa                                                                    | IRST "Dino Amadori" - IRCCS                           | P                 |

**Allegato:** elenco dei componenti del Comitato Etico presenti al momento dell'espressione del presente parere

**NOTA:** per qualsiasi successiva comunicazione relativa allo studio in oggetto è indispensabile fare riferimento al codice interno CE che identifica lo studio (indicato nell'oggetto) e alla data della seduta di valutazione.

**Il presente parere è spedito dalla Segreteria Locale presso l'Azienda Ospedaliero-Universitaria di Ferrara.**

**Le comunicazioni in merito a questo parere devono essere inoltrate all'indirizzo email: [comitatoetico@ospfe.it](mailto:comitatoetico@ospfe.it)**



*Il Comitato Etico Area Vasta Emilia Centro della Regione Emilia-Romagna (CE-AVEC) è stato istituito con delibera regionale n. 923 del 05/06/2023  
Il CE-AVEC opera in conformità al D.M. del 26 gennaio 2023 "Individuazione di quaranta comitati etici territoriali" e al DM del 30 gennaio 2023  
"Definizione dei criteri per la composizione e il funzionamento dei comitati etici territoriali"*

|                    |                                     |                                     |   |
|--------------------|-------------------------------------|-------------------------------------|---|
| Michela Pastore    | Medico di Medicina Generale         | MMG in convenzione con AUSL Ferrara | P |
| Elisabetta Sanvito | Esperto in Dispositivi Medici       | in quiescenza                       | P |
| Emanuela Scarpi    | Biostatistico                       | IRST "Dino Amadori" - IRCCS         | P |
| Patrizia Serra     | Esperto in Nutrizione               | IRST "Dino Amadori" - IRCCS         | P |
| Savino Spadaro     | Esperto in Anestesia e Rianimazione | AOU di Ferrara                      | A |
| Marcello Tiseo     | Esperto in Oncologia                | AOU di Parma                        | A |

**Partecipano alla seduta i seguenti rappresentanti delle Segreterie (senza diritto di voto):**

- Stefania Proni, Giacomo Chiabrando, Marta Sperti, Alessandra Brunetti, Serena Di Rienzo, Urbano Briganti: Segreteria centrale e Segreteria locale presso IRCCS-Azienda Ospedaliero Universitaria di Bologna;
- Corrado Iacono, Giulia Tempesta: Segreteria locale presso Azienda USL di Bologna e di Imola;
- Simonetta Gamberini, Arianna Ferretti Cherkes Zade: Segreteria locale presso Istituto Ortopedico Rizzoli;
- Marco Voci: Segreteria locale presso Azienda Ospedaliero Universitaria di Ferrara

**Allegato:** elenco dei componenti del Comitato Etico presenti al momento dell'espressione del presente parere

**NOTA:** per qualsiasi successiva comunicazione relativa allo studio in oggetto è indispensabile fare riferimento al codice interno CE che identifica lo studio (indicato nell'oggetto) e alla data della seduta di valutazione.

**Il presente parere è spedito dalla Segreteria Locale presso l'Azienda Ospedaliero-Universitaria di Ferrara.**

**Le comunicazioni in merito a questo parere devono essere inoltrate all'indirizzo email: [comitatoetico@ospfe.it](mailto:comitatoetico@ospfe.it)**

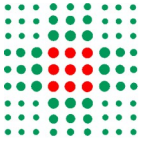

*The Emilia Central Area Ethics Committee of the Emilia-Romagna Region (CE-AVEC) was established by Regional Resolution No. 923 of June 5, 2023. The CE-AVEC operates in accordance with the Ministerial Decree of January 26, 2023 "Identification of forty territorial ethics committees" and Ministerial Decree of January 30, 2023 "Definition of criteria for the composition and functioning of territorial ethics committees."*

Bologna, October 17, 2024

**586/2024/Sper/AOUFe evaluated during the session of 10/17/2024**

Dr. Silvia Fanaro  
Neonatology and Neonatal  
Intensive Care Unit, Ferrara  
University Hospital  
[silvia.fanaro@unife.it](mailto:silvia.fanaro@unife.it)

Dr. Federica D'Ambrosio Penta ETS  
Foundation  
[federica.dambrosio@pentafoundation.org](mailto:federica.dambrosio@pentafoundation.org)

***Subject: Optimising kangaroo care to reduce neonatal severe infection/sepsis and resistant bacterial colonisation among high-risk infants in neonatal intensive care: a pragmatic, multicentre, parallel cluster randomised hybrid implementation-effectiveness study***

***Protocol code: NeoDeco***

***Internal EC code: 586/2024/Sper/AOUFe***

***Promoter: Penta ETS Foundation (Horizon 2020 funding) Coordinating***

***Center: Padua University Hospital Principal Investigator: Dr. Silvia Fanaro***

***Clinical Center: Neonatology and NICU Unit – Ferrara University Hospital***

List of documentation examined:

- 1 Cover letter
- 2 Study protocol
- 3 Synopsis
- 4 Information sheet and informed consent form for parents/legal guardians
- 5 Privacy policy and consent to the processing of personal data
- 6 List of variables (CRF)
- 7 List of centers participating in the study

**Attachment:** list of members of the Ethics Committee present at the time of issuing this opinion

**NOTE:** for any subsequent communication relating to the study in question, it is essential to refer to the internal EC code that identifies the study (indicated in the subject line) and the date of the evaluation meeting.

**This opinion is sent by the Local Secretariat at the Ferrara University Hospital.**

**Communications regarding this opinion should be sent to the following email address: [comitatoetico@ospfe.it](mailto:comitatoetico@ospfe.it)**



*The Emilia Central Area Ethics Committee of the Emilia-Romagna Region (CE-AVEC) was established by Regional Resolution No. 923 of June 5, 2023. The CE-AVEC operates in accordance with the Ministerial Decree of January 26, 2023 "Identification of forty territorial ethics committees" and Ministerial Decree of January 30, 2023 "Definition of criteria for the composition and functioning of territorial ethics committees."*

- 8 Insurance certificate
- 9 Curricula vitae of the investigators
- 10 Conflict of interest declaration form
- 11 Draft economic agreement
- 12 Horizon 2020 Invitation Letter
- 13 Local feasibility form
- 14 Opinion of the Ethics Committee of the coordinating center

During its online meeting on October 17, 2024, the Ethics Committee unanimously expressed **its approval** for the study to go ahead.

It should be noted that

- The study may only be started after receiving approval from the General Management of the relevant healthcare facility in accordance with Article 7 of Regional Law No. 9/2017.
- For the purposes of monitoring the progress of the study in question, the **Principal Investigator** is required to provide the Ethics Committee **with periodic reports on the progress** of the study from its inception to its completion, annually or more frequently in the event of events that significantly affect the conduct of the study and/or increase the risk to participants. For this purpose, the form available on the website [https://www.aosp.bo.it/sites/default/files/Allegati\\_ricerca/modulo\\_monitoraggio\\_ce\\_avec.docx](https://www.aosp.bo.it/sites/default/files/Allegati_ricerca/modulo_monitoraggio_ce_avec.docx) of the Ethics Committee. The completed, signed, and dated form must be sent exclusively in electronic format to the dedicated email address [monitoraggiostudi@ospfe.it](mailto:monitoraggiostudi@ospfe.it), indicating in the subject line the name of the clinical center of reference, the name of the relevant Investigator, and the code assigned to the study by the Committee.

Kind regards

The President

**Attachment:** list of members of the Ethics Committee present at the time of expressing this opinion

**NOTE:** for any subsequent communication relating to the study in question, it is essential to refer to the internal EC code that identifies the study (indicated in the subject line) and the date of the evaluation meeting.

**This opinion is sent by the Local Secretariat at the University Hospital of Ferrara.**

**Any communications regarding this opinion should be sent to the following email address: [comitatoetico@ospfe.it](mailto:comitatoetico@ospfe.it)**

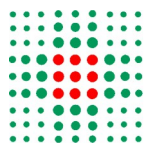

*The Emilia Central Area Ethics Committee of the Emilia-Romagna Region (CE-AVEC) was established by Regional Resolution No. 923 of June 5, 2023. The CE-AVEC operates in accordance with the Ministerial Decree of January 26, 2023 "Identification of forty territorial ethics committees" and Ministerial Decree of January 30, 2023 "Definition of criteria for the composition and functioning of territorial ethics committees."*

**Members of the Emilia Centro Area Ethics Committee (CE-AVEC) Telematic meeting of 17/10/2024**

| <b>First and last name</b>        | <b>Qualification according to Ministerial Decree of January 30, 2023</b>                                      | <b>Affiliation</b>                                    | <b>Present/Absent</b> |
|-----------------------------------|---------------------------------------------------------------------------------------------------------------|-------------------------------------------------------|-----------------------|
| Elisabetta Poluzzi - Chair        | Pharmacologist                                                                                                | University of Bologna                                 | P                     |
| Primiano Iannone - Vice President | Clinical Expert in Gastroenterology                                                                           | Local Health Authority of Bologna                     | A                     |
| Federica Banorri                  | Legal expert                                                                                                  | IRCCS AOU of Bologna                                  | P                     |
| Francesca Bonetti                 | Representative of patient or citizen associations involved in health issues                                   | Representative of AGD, Association of Young Diabetics | P                     |
| Elisabetta Cagni                  | Medical physicist                                                                                             | AUSL (Local Health Authority) of Reggio Emilia        | P                     |
| Fausto Catena                     | Clinical Expert in General Surgery                                                                            | Romagna Local Health Authority                        | P                     |
| Paolo Cristiani                   | Clinical Expert in Gynecology and Obstetrics                                                                  | Freelancer                                            | P                     |
| Alessandra De Palma               | Medical examiner                                                                                              | IRCCS AOU of Bologna                                  | P                     |
| Danilo Di Diodoro                 | Clinical Expert in Psychiatry                                                                                 | Retired                                               | P                     |
| Giuseppe Di Pasquale              | Clinician Expert in new invasive and semi-invasive technical, diagnostic, and therapeutic procedures invasive | Freelancer                                            | P                     |
| Susanna Esposito                  | Pediatrician                                                                                                  | AOU of Parma                                          | P                     |
| Carla Faralli                     | Expert in Bioethics                                                                                           | University of Bologna                                 | P                     |
| Simona Ferrari                    | Expert in Genetics                                                                                            | IRCCS AOU of Bologna                                  | A                     |
| Graziella Filippini               | Clinical Expert in Neurology                                                                                  | Retired                                               | P                     |
| Carlo Finelli                     | Clinical Expert in Hematology                                                                                 | Freelancer                                            | P                     |
| Lorenzo Gasperoni                 | Pharmacist, National Health Service                                                                           | IRST "Dino Amadori" - IRCCS                           | P                     |
| Monica Guberti                    | Representative of the Healthcare Professions Area                                                             | IRCCS – Rizzoli Orthopaedic Institute in Bologna      | P                     |
| Carlo Impallomeni                 | Clinical Expert in Orthopedics and Traumatology                                                               | Imola Local Health Authority                          | P                     |
| Lamberto Manzoli                  | Biostatistician                                                                                               | University of Bologna                                 | A                     |
| Gianluca Mazza                    | Insurance expert                                                                                              | IRST "Dino Amadori" - IRCCS                           | P                     |

**Attachment:** list of members of the Ethics Committee present at the time of issuing this opinion

**NOTE:** for any subsequent communication relating to the study in question, it is essential to refer to the internal EC code that identifies the study (indicated in the subject line) and the date of the evaluation meeting.

**This opinion is sent by the Local Secretariat at the University Hospital of Ferrara.**

**Any communications regarding this opinion should be sent to the following email address: [comitatoetico@ospfe.it](mailto:comitatoetico@ospfe.it)**

*Ethics Committee for the Emilia Centro Area of the Emilia-Romagna Region*

*<http://www.aosp.bo.it/content/comitato-etico>*

*For contact details, please refer to the website indicated above*

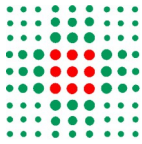

*The Emilia Central Area Ethics Committee of the Emilia-Romagna Region (CE-AVEC) was established by Regional Resolution No. 923 of June 5, 2023. The CE-AVEC operates in accordance with the Ministerial Decree of January 26, 2023 "Identification of forty territorial ethics committees" and Ministerial Decree of January 30, 2023 "Definition of criteria for the composition and functioning of territorial ethics committees."*

|                    |                                        |                                                   |   |
|--------------------|----------------------------------------|---------------------------------------------------|---|
| Michela Pastore    | General Practitioner                   | General Practitioner affiliated with AUSL Ferrara | P |
| Elisabetta Sarvito | Expert in Medical Devices              | Retired                                           | P |
| Emanuela Scarpi    | Biostatistician                        | IRST "Dino Amadori" - IRCCS                       | P |
| Patrizia Serra     | Nutrition Expert                       | IRST "Dino Amadori" - IRCCS                       | P |
| Savino Spadaro     | Expert in Anesthesia and Resuscitation | AOU of Ferrara                                    | A |
| Marcello Tiseo     | Expert in Oncology                     | Parma University Hospital                         | A |

**The following representatives of the Secretariats participate in the meeting (without voting rights):**

- Stefania Proni, Giacomo Chiabrando, Marta Sperti, Alessandra Brunetti, Serena Di Rienzo, Urbano Briganti: Central Secretariat and Local Secretariat at IRCCS-University Hospital of Bologna;
- Corrado Iacono, Giulia Tempesta: Local Secretariat at the Local Health Authority of Bologna and Imola;
- Simonetta Gamberini, Arianna Ferretti Cherkes Zade: Local Secretariat at the Rizzoli Orthopaedic Institute;
- Marco Voci: Local Secretariat at Ferrara University Hospital

**Attachment:** list of members of the Ethics Committee present at the time of issuing this opinion

**NOTE:** for any subsequent communication relating to the study in question, it is essential to refer to the internal EC code that identifies the study (indicated in the subject line) and the date of the evaluation meeting.

**This opinion is sent by the Local Secretariat at the University Hospital of Ferrara.**

**Communications regarding this opinion should be sent to the following email address: [comitatoetico@ospfe.it](mailto:comitatoetico@ospfe.it)**

**Italy**

Azienda Ospedaliera Universitaria di Modena

## Comitato Etico Area Vasta Emilia Nord

Il Comitato Etico Territoriale è stato istituito con D.G.R. n. 923 del 5 giugno 2023 e ss.mm.ii. e opera in conformità alla L. 11 gennaio 2018, n. 3 "Delega al Governo in materia di sperimentazione clinica di medicinali nonché disposizioni per il riordino delle professioni sanitarie e per la dirigenza sanitaria del Ministero della salute", al D.M. 26 gennaio 2023 "Individuazione di quaranta comitati etici territoriali" e al D.M. 30 gennaio 2023 "Definizione dei criteri per la composizione e il funzionamento dei comitati etici territoriali"

### Prof. Alberto Berardi

Neonatologia e Nido  
Azienda Ospedaliero-Universitaria di Modena  
Sede Policlinico  
alberto.berardi@unimore.it

### Dott. Claudio Vagnini

Direttore Generale  
Azienda Ospedaliero-Universitaria di Modena

### Dott. Ottavio Alessandro Nicastro

Direttore Sanitario  
Azienda Ospedaliero-Universitaria di Modena

**Oggetto: 385/2024/SPER/AOUMO – NeoDeco (NCT05993442)** "Ottimizzazione della Kangaroo Care per la riduzione delle infezioni neonatali severe/sepsi e della colonizzazione da batteri resistenti in neonati ad alto rischio in terapia intensive neonatale: studio pragmatico, multicentrico, a bracci paralleli, randomizzato a cluster, con intervento ibrido di implementazione/efficacia (Optimising kangaroo care to reduce neonatal severe infection/sepsis and resistant bacterial colonisation among high-risk infants in neonatal intensive care: a pragmatic, multicentre, parallel cluster randomised hybrid implementation-effectiveness study)".

*Promotore NON COMMERCIALE:* Fondazione Penta ETS (European Union's Horizon 2020 research and innovation programme under grant agreement/Programma UE in materia di Ricerca e Innovazione Orizzonte 2020 della Commissione Europea sotto l'accordo di sovvenzione N. 965328 – Progetto Establishing innovative approaches for optimal infection prevention of resistant bacteria in NICUs by integrating research, implementation science and surveillance in a sustainable global platform – NeoIPC)

*Sperimentatore:* Prof. Alberto Berardi

*Centro clinico:* U.O. Neonatologia e Nido

*Elenco della documentazione esaminata:*

- 0\_Elenco dei documenti sottomessi\_v1.0 del 17.07.2024.docx
- 1.1\_Lettera d'intenti\_03.05.2024 firmata 06.05.2024.pdf
- 1.2\_Lettera di chiarimenti\_Padova \_30.08.2024.pdf
- 2\_Elenco centri partecipanti\_v3.0 del 13.02.2024.pdf
- 3\_Protocollo\_v3.0 dell'08.04.2024.pdf
- 4\_Sinossi\_v3.0 dell'08.04.2024.pdf
- 5.1\_Foglio informativo e consenso\_v1.0 del 09.04.2024\_clean.docx
- 5.1\_Foglio informativo e consenso\_v1.0 del 09.04.2024\_track.docx
- 5.2\_Informativa e consenso al trattamento dei dati personali\_v1.0 del 17.09.2024\_clean.docx
- 5.2\_Informativa e consenso al trattamento dei dati personali\_v1.0 del 17.09.2024\_track.docx
- 6\_Lista delle variabili\_v2.0 del 14.03.2024.pdf
- 7\_Certificato assicurativo\_28.06.2023.pdf
- 8\_CV Berardi\_14.02.2024.pdf
- 9\_Appendice 15\_05.03.2024.pdf
- 10\_Bozza di convenzione sulla trasferibilità dei dati.doc
- 11\_GAP invitation letter.pdf
- 12.1\_Parere condizionato CEC\_seduta del 25.07.2024.pdf
- 12.2\_Parere favorevole CEC\_04.09.2024.pdf
- 12.3\_Lettera invio parere favorevole CEC\_seduta del 25.07.2024.pdf
- 13\_Modulo di fattibilità\_vistato il 09.10.2024.pdf

Il Comitato Etico, nella seduta del 07/11/2024, esprime **PARERE FAVOREVOLE** alla conduzione dello studio.

**Si ricorda che lo studio potrà essere avviato solo dopo aver ricevuto il nulla osta/autorizzazione da parte della Direzione dell'Ente di competenza della struttura di riferimento.**

(Referente Dott. Pasquale Mighali - e-mail [dirsan.autorizzaz@aou.mo.it](mailto:dirsan.autorizzaz@aou.mo.it)).

# **Comitato Etico Area Vasta Emilia Nord**

*Il Comitato Etico Territoriale è stato istituito con D.G.R. n. 923 del 5 giugno 2023 e ss.mm.ii. e opera in conformità alla L. 11 gennaio 2018, n. 3 "Delega al Governo in materia di sperimentazione clinica di medicinali nonché disposizioni per il riordino delle professioni sanitarie e per la dirigenza sanitaria del Ministero della salute", al D.M. 26 gennaio 2023 "Individuazione di quaranta comitati etici territoriali" e al D.M. 30 gennaio 2023 "Definizione dei criteri per la composizione e il funzionamento dei comitati etici territoriali"*

Resta inteso che ai fini del monitoraggio dell'andamento dello studio in oggetto, lo Sperimentatore Responsabile dovrà comunicare al Comitato Etico, facendo riferimento alla Segreteria di propria competenza, le seguenti informazioni relativamente a questo singolo centro sperimentale: data di inizio arruolamento, data di fine arruolamento e data di conclusione dello studio. In ogni caso, a partire dall'anno di approvazione dello studio e fino alla sua conclusione, almeno una volta all'anno e comunque entro e non oltre il 31 dicembre, dovrà essere fornito un rapporto annuale sullo stato di avanzamento dello studio. Per le suddette comunicazioni occorre utilizzare il modulo disponibile sul sito web del Comitato Etico AVEN. Il modulo compilato, firmato e datato, andrà inviato in formato elettronico.

**NOTA:** per qualsiasi successiva comunicazione relativa allo studio in oggetto è indispensabile fare riferimento al codice interno CE che identifica lo studio (indicato nell'oggetto) e alla data della seduta di valutazione.

*IL PRESIDENTE*

**Allegato:** Elenco Componenti CE AVEN

# Comitato Etico Area Vasta Emilia Nord

Il Comitato Etico Territoriale è stato istituito con D.G.R. n. 923 del 5 giugno 2023 e ss.mm.ii. e opera in conformità alla L. 11 gennaio 2018, n. 3 "Delega al Governo in materia di sperimentazione clinica di medicinali nonché disposizioni per il riordino delle professioni sanitarie e per la dirigenza sanitaria del Ministero della salute", al D.M. 26 gennaio 2023 "Individuazione di quaranta comitati etici territoriali" e al D.M. 30 gennaio 2023 "Definizione dei criteri per la composizione e il funzionamento dei comitati etici territoriali"

## Seduta in data 07/11/2024 Componenti del CE e qualifiche

| Cognome e nome                               | Ruolo                                                                                                | Afferenza                                   | Presenza/Assenza |
|----------------------------------------------|------------------------------------------------------------------------------------------------------|---------------------------------------------|------------------|
| <b>Presidente</b><br>GRILLI ROBERTO GIUSEPPE | Esperto in Sperimentazione clinica                                                                   | AUSL Romagna                                | Presente         |
| <b>Vicepresidente</b><br>DE PONTI FABRIZIO   | Farmacologo                                                                                          | UNIBO                                       | Assente          |
| <b>COMPONENTI</b>                            |                                                                                                      |                                             |                  |
| ALBERGHINI LUCIA                             | Farmacista ospedaliero                                                                               | AUSLBO in comando in Regione Emilia-Romagna | Presente         |
| BETTINI ANNALISA                             | Rappresentante delle associazioni di pazienti o dei cittadini impegnati sui temi della salute        | AUSLBO                                      | Presente         |
| BIANCHINI DAVID                              | Esperto in dispositivi medici                                                                        | IRST "Dino Amadori" IRCCS                   | Presente         |
| BORIANI GIUSEPPE                             | Clinico – Esperto in nuove procedure tecniche, diagnostiche e terapeutiche, invasive e semi-invasive | UNIMORE                                     | Presente         |
| CAFARO ALESSANDRO                            | Farmacista ospedaliero                                                                               | IRST "Dino Amadori" IRCCS                   | Presente         |
| CIONI GIORGIO                                | Clinico – Esperto in Cardiologia                                                                     | Libero professionista                       | Presente         |
| COPPOLA TERESA                               | Esperto in materia assicurativa                                                                      | AOUPR                                       | Assente          |
| CREMONINI VALERIA                            | Rappresentante dell'area delle professioni sanitarie                                                 | AUSL Romagna                                | Presente         |
| DE PALMA ROSSANA                             | Clinico – Esperto in Medicina interna                                                                | A riposo                                    | Presente         |
| FERRARI ISABELLA                             | Esperto in Materia giuridica                                                                         | UNIMORE                                     | Presente         |
| FRANCIOSI VITTORIO                           | Clinico – Esperto in Bioetica                                                                        | Libero professionista                       | Presente         |
| GIORDANO BRUNA                               | Ingegnere clinico                                                                                    | AUSLPR                                      | Presente         |
| INGRAVALLO FRANCESCA                         | Medico Legale                                                                                        | UNIBO                                       | Presente         |
| LENZI MARINELLA                              | Clinico – Esperto in Ginecologia ed Ostetricia                                                       | Libera professionista                       | Presente         |
| LONGONI MARCO                                | Clinico – Esperto in Neurologia                                                                      | AUSL Romagna                                | Presente         |
| MAGGIORE UMBERTO                             | Clinico – Esperto in Nefrologia                                                                      | UNIPR                                       | Assente          |
| MAGLIETTA GIUSEPPE                           | Biostatistico                                                                                        | AOUPR                                       | Presente         |
| ORLANDINI DANILO                             | Clinico – Esperto in Nutrizione                                                                      | Libero professionista                       | Presente         |
| ORSI CAROLA                                  | Medico di Medicina Generale                                                                          | AUSLPR                                      | Presente         |
| PANZA COSTANTINO                             | Pediatra                                                                                             | AUSLRE                                      | Presente         |
| PERCESEPE ANTONIO                            | Clinico – Esperto in Genetica                                                                        | UNIPR                                       | Presente         |
| RIDOLFI LAURA                                | Clinico – Esperto in Oncologia                                                                       | IRST "Dino Amadori" IRCCS                   | Assente          |
| ROTI GIOVANNI                                | Clinico – Esperto in Ematologia                                                                      | UNIPR                                       | Presente         |
| ZONA STEFANO                                 | Clinico – Esperto in Malattie infettive                                                              | AUSLMO                                      | Assente          |

**Si dichiara che si sono astenuti dal pronunciarsi i Componenti che potevano avere conflitti di interesse diretti o indiretti con le sperimentazioni valutate.**

# Emilia Nord Area Ethics Committee

The Regional Ethics Committee was established by Regional Council Resolution no. 923 of June 5, 2023, as amended, and operates in accordance with

Law no. 3 of January 11, 2018, "Delegation to the Government on clinical trials of medicinal products and provisions for the reorganization of the health professions and health management of the Ministry of Health," and Ministerial Decree of January 26, 2023.

"Identification of forty regional ethics committees" and Ministerial Decree of January 30, 2023 "Definition of criteria for the composition and functioning of regional ethics committees"

**Prof. Alberto Berardi**

Neonatology and Nursery  
Modena University Hospital Polyclinic  
alberto.berardi@unimore.it

**Dr. Claudio Vagnini**

General Director  
Modena University Hospital

**Dr. Ottavio Alessandro Nicastro**

Healthcare Director  
Modena University Hospital

Subject: **385/2024/SPER/AOUMO – NeoDeco (NCT05993442)** "Optimization of Kangaroo Care to reduce severe neonatal infections/sepsis and colonization by resistant bacteria in high-risk newborns in neonatal intensive care: a pragmatic, multicenter, parallel cluster randomized hybrid implementation-effectiveness study."

*NON-COMMERCIAL promoter:* Fondazione Penta ETS (European Union's Horizon 2020 research and innovation program under grant agreement/European Commission's Horizon 2020 EU Research and Innovation Program under grant agreement No. 965328 – Project Establishing innovative approaches for optimal infection prevention of resistant bacteria in NICUs by integrating research, implementation science and surveillance in a sustainable global platform – NeoIPC)

*Investigator:* Prof. Alberto Berardi

*Clinical center:* Neonatology and Nursery Unit

*List of documentation examined:*

- 0\_Elenco dei documenti sottomessi\_v1.0 del 17.07.2024.docx
- 1.1\_Lettera d'intenti\_03.05.2024 firmata 06.05.2024.pdf
- 1.2\_Lettera di chiarimenti\_Padova\_30.08.2024.pdf
- 2\_Elenco centri partecipanti\_v3.0 del 13.02.2024.pdf
- 3\_Protocollo\_v3.0 dell'08.04.2024.pdf
- 4\_Sinossi\_v3.0 dell'08.04.2024.pdf
- 5.1\_Foglio informativo e consenso\_v1.0 del 09.04.2024\_clean.docx
- 5.1\_Foglio informativo e consenso\_v1.0 del 09.04.2024\_track.docx
- 5.2\_Informativa e consenso al trattamento dei dati personali\_v1.0 del 17.09.2024\_clean.docx
- 5.2\_Informativa e consenso al trattamento dei dati personali\_v1.0 del 17.09.2024\_track.docx
- 6\_Lista delle variabili\_v2.0 del 14.03.2024.pdf
- 7\_Certificato assicurativo\_28.06.2023.pdf
- 8\_CV Berardi\_14.02.2024.pdf
- 9\_Appendice 15\_05.03.2024.pdf
- 10\_Bozza di convenzione sulla trasferibilità dei dati.doc
- 11\_GAP invitation letter.pdf
- 12.1\_Parere condizionato CEC\_seduta del 25.07.2024.pdf
- 12.2\_Parere favorevole CEC\_04.09.2024.pdf
- 12.3\_Lettera invio parere favorevole CEC\_seduta del 25.07.2024.pdf
- 13\_Modulo di fattibilità\_vistato il 09.10.2024.pdf

At its meeting on November 7, 2024, the Ethics Committee expressed a **FAVORABLE OPINION** on the conduct of the study.

**Please note that the study may only be started after receiving clearance/authorization from the management of the competent authority of the reference facility.**

(Contact person: Dr. Pasquale Mighali - email: [dirdsan.autorizzaz@aou.mo.it](mailto:dirdsan.autorizzaz@aou.mo.it)).

# Emilia Nord Area Ethics Committee

The Regional Ethics Committee was established by Regional Council Resolution no. 923 of June 5, 2023, as amended, and operates in accordance with

Law no. 3 of January 11, 2018, "Delegation to the Government on clinical trials of medicinal products and provisions for the reorganization of the health professions and health management of the Ministry of Health," and Ministerial Decree of January 26, 2023.

"Identification of forty regional ethics committees" and Ministerial Decree of January 30, 2023 "Definition of criteria

for the purposes of monitoring the progress of the study in question, the Principal Investigator must communicate the following information relating to this single trial center to the Ethics Committee, through the relevant Secretariat: start date of enrollment, end date of enrollment, and date of completion of the study. In any case, starting from the year of approval of the study and until its conclusion, at least once a year and in any case no later than December 31, an annual report on the progress of the study must be provided. For the above communications, the form available on the AVEN Ethics Committee website must be used. The completed, signed, and dated form must be sent in electronic format.

**NOTE:** For any subsequent communication regarding the study in question, it is essential to refer to the internal CE code that identifies the study (indicated in the subject line) and the date of the evaluation session.

*THE PRESIDENT*

Digitally signed by: ROBERTO GIUSEPPE GRILLI Date:  
08/11/2024 10:41:46

**Attachment:** List of CE AVEN members

# Emilia Nord Area Ethics Committee

The Regional Ethics Committee was established by Regional Council Resolution no. 923 of June 5, 2023, as amended, and operates in accordance with

Law no. 3 of January 11, 2018, "Delegation to the Government on clinical trials of medicinal products and provisions for the reorganization of the health professions and health management of the Ministry of Health," and Ministerial Decree of January 26, 2023.

"Identification of forty regional ethics committees" and Ministerial Decree of January 30, 2023 "Definition of criteria for the composition of the ethics committees"

## Meeting on 07/11/2024 EC members and qualifications

| Surname and first name                     | Role                                                                                                   | Affiliation                                    | Present/Absent |
|--------------------------------------------|--------------------------------------------------------------------------------------------------------|------------------------------------------------|----------------|
| <b>Chair</b><br>GRILLI ROBERTO GIUSEPPE    | Expert in Clinical Trials                                                                              | AUSL Romagna                                   | Present        |
| <b>Vice President</b><br>DE PONTI FABRIZIO | Pharmacologist                                                                                         | UNIBO                                          | Absent         |
| <b>COMPONENTS</b>                          |                                                                                                        |                                                |                |
| ALBERGHINI LUCIA                           | Hospital pharmacist                                                                                    | AUSLBO in command in the Emilia-Romagna Region | Present        |
| BETTINI ANNALISA                           | Representative of patient associations or citizens involved in health issues                           | AUSLBO                                         | Present        |
| BIANCHINI DAVID                            | Expert in medical devices                                                                              | IRST "Dino Amadori" IRCCS                      | Present        |
| GIUSEPPE BORIANI                           | Clinician – Expert in new invasive and semi-invasive technical, diagnostic, and therapeutic procedures | UNIMORE                                        | Present        |
| CAFARO ALESSANDRO                          | Hospital pharmacist                                                                                    | IRST "Dino Amadori" IRCCS                      | Present        |
| CIONI GIORGIO                              | Clinician – Cardiology expert                                                                          | Freelancer                                     | Present        |
| COPPOLA TERESA                             | Insurance expert                                                                                       | AOUPR                                          | Absent         |
| CREMONINI VALERIA                          | Representative of the healthcare professions                                                           | AUSL Romagna                                   | Present        |
| DE PALMA ROSSANA                           | Clinician – Expert in Internal Medicine                                                                | Retired                                        | Present        |
| FERRARI ISABELLA                           | Expert in Legal Matters                                                                                | UNIMORE                                        | Present        |
| FRANCIOSI VITTORIO                         | Clinician – Expert in Bioethics                                                                        | Freelancer                                     | Present        |
| GIORDANO BRUNA                             | Clinical Engineer                                                                                      | AUSLPR                                         | Present        |
| INGRAVALLO FRANCESCA                       | Medical examiner                                                                                       | UNIBO                                          | Present        |
| LENZI MARINELLA                            | Clinician – Expert in Gynecology and Obstetrics                                                        | Freelancer                                     | Present        |
| LONGONI MARCO                              | Clinician – Expert in Neurology                                                                        | AUSL Romagna                                   | Present        |
| MAGGIORE UMBERTO                           | Clinician – Expert in Nephrology                                                                       | UNIPR                                          | Absent         |
| GIUSEPPE MAGLIETTA                         | Biostatistician                                                                                        | AOUPR                                          | Present        |
| ORLANDINI DANILO                           | Clinician – Nutrition Expert                                                                           | Freelancer                                     | Present        |
| ORSI CAROLA                                | General Practitioner                                                                                   | AUSLPR                                         | Present        |
| PANZA COSTANTINO                           | Pediatrician                                                                                           | AUSLRE                                         | Present        |
| PERCESEPE ANTONIO                          | Clinician – Expert in Genetics                                                                         | UNIPR                                          | Present        |
| RIDOLFI LAURA                              | Clinician – Oncology Expert                                                                            | IRST "Dino Amadori" IRCCS                      | Absent         |
| ROTI GIOVANNI                              | Clinician – Expert in Hematology                                                                       | UNIPR                                          | Present        |
| ZONA STEFANO                               | Clinician – Infectious Diseases Specialist                                                             | AUSLMO                                         | Absent         |

**It is hereby declared that those members who could have had direct or indirect conflicts of interest with the trials evaluated abstained from voting.**

**Italy**

Ospedale San Bortolo di Vicenza

# COMITATO ETICO TERRITORIALE AREA SUD OVEST VENETO

*Istituito con Decreto del Direttore Generale dell'Area Sanità e Sociale n. 330 del 29 marzo 2023  
con sede operativa c/o Azienda Ospedaliera Universitaria Integrata Verona  
P.le A. Stefani, 1 - 37126 Verona - Tel. 045 8123236 - Fax 045 8123177  
e-mail: [comitatoetico@aovr.veneto.it](mailto:comitatoetico@aovr.veneto.it)  
PEC: [comitatoetico.aovr@pecveneto.it](mailto:comitatoetico.aovr@pecveneto.it)*

Prot. n.5063 del 21/01/2025

Sperimentatore: Dott.ssa Stefania Vedovato, CENTRO: Azienda ULSS n. 8 Berica – Terapia Intensiva Neonatale di Vicenza

Promotore: Fondazione Penta ETS

URC: Azienda ULSS n. 8 Berica

**Oggetto: Prog. 445CET - Studio clinico: Optimising kangaroo care to reduce neonatal severe infection/sepsis and resistant bacterial colonisation among high-risk infants in neonatal intensive care: a pragmatic, multicentre, parallel cluster randomised hybrid implementation effectiveness study (NeoDeco) – Codice Protocollo: NeoDeco**

In riferimento alla richiesta di autorizzazione dello studio in oggetto, si trasmettono le decisioni del Comitato Etico Territoriale Area Sud-Ovest Veneto riunitosi in data **14-01-2025**, tramite conferenza via web.

Si rammenta che per l'attivazione della sperimentazione è necessario attendere, ove previsto, la ricezione dell'autorizzazione della propria Amministrazione.

**Il Comitato Etico Territoriale  
in osservanza a quanto previsto dalla legislazione vigente in materia di  
sperimentazione clinica  
ha esaminato la richiesta in oggetto, ed in particolare la seguente documentazione:**

Documentazione generale:

- Parere favorevole del Comitato Etico Coordinatore – data: 25/07/2024
- Parere favorevole del Comitato Etico Coordinatore – data:16/09/2024 – note: scioglimento condizioni
- Protocollo di studio - vers: 3.0 - data: 08/04/2024
- Sinossi del protocollo - vers: 3.0 – data: 08/04/2024
- Scheda raccolta dati (CRF) - vers: 2.0 – data: 14/03/2024
- Polizza assicurativa o certificato assicurativo firmato dal contraente
- Elenco dei centri partecipanti - vers: 6.0 - data: 01/08/2024

Documentazione centro-specifica:

- Raccolta, conservazione e uso futuro di campioni biologici
- Foglio informativo e modulo di consenso informato - vers: 1.1 - data: 29/11/2024
- Modulo per il consenso al trattamento dei dati personali - vers: 1.0 - data: 17/09/2024
- Dichiarazione sostitutiva per mancanza lettera per il MMG – data: 16/09/2024
- Curriculum Vitae dello Sperimentatore Principale – data: 03/12/2024

- Certificazione GCP – data: 21/11/2024
- Dichiarazione sul conflitto d’interesse dello Sperimentatore Principale (DoI) – data: 01/09/2024
- Dichiarazione per l’accertamento della natura indipendente dello studio - vers: 1 data: 01/08/2024
- Modulo di fattibilità locale - vers: 1.0 - data: 27/08/2024
- Bozza di convenzione economica – vers: 01 – data: 03/10/2024
- Lettera di trasmissione – data: 10/09/2024
- Lettera di chiarimenti – vers.: 2.0 – data: 18/12/2024

Data arrivo documentazione completa: 18-12-2024

**HA ESPRESSO IL SEGUENTE PARERE:**

**Approvato**

Note/richieste: In data 18/12/2024 sono pervenuti presso la segreteria del CET ASOV i chiarimenti relativi allo studio. In particolare è pervenuta una lettera di chiarimenti in risposta alle richieste del CET, il CV della Dr.ssa Vedovato con certificato GCP annesso, la polizza di studio specifica, ed infine il foglio informativo e modulo di consenso informato aggiornato.

Il CET ASOV procede con l’approvazione dello studio.

**APPROVATO**

Si ricorda che:

- Lo Sperimentatore è tenuto a segnalare al Comitato Etico Territoriale l'arruolamento del primo paziente.
- Al termine della Sperimentazione, lo Sperimentatore dovrà inviare al Comitato Etico Territoriale la relazione finale, al termine di ogni anno inoltre lo Sperimentatore dovrà inviare altresì la relazione annuale.

**Componenti del Comitato Etico Territoriale Area Sud-Ovest Veneto presenti alla discussione:**

- BONETTI Andrea, Clinico esperto in materia di sperimentazione clinica
- GAJOFATTO Alberto, Clinico esperto in materia di sperimentazione clinica
- PASINI Felice, Clinico esperto in materia di sperimentazione clinica
- BRUGNARO Pierluigi, Clinico esperto in materia di sperimentazione clinica
- MALLEO Giuseppe, Clinico esperto nello studio di nuove procedure tecniche, diagnostiche e terapeutiche, invasive e semi invasive
- RIGON Giulio, Medico di Medicina Generale Territoriale
- GANGEMI Michele, Pediatria
- DEL BIANCO Paola, Biostatistico
- LEONE Roberto, Farmacologo
- RANIERO Dario, Esperto in materia assicurativa
- STRINI Veronica, Rappresentante dell’area delle professioni sanitarie interessata alla sperimentazione

- BONINSEGNA Fernando, Rappresentante delle associazioni di pazienti o cittadini impegnati sui temi della salute
- GIRI Maria Grazia, Fisico Medico
- BRESOLIN Chiara, Ingegnere Clinico
- MELOTTI Paola, Esperto di genetica, in relazione agli studi di genetica
- CASTELLO Roberto, Clinico esperto in materia di sperimentazione clinica
- CORDIANO Alessandra, Esperto in materia giuridica
- VENTURINI Francesca, Farmacista ospedaliero

**Componenti del Comitato Etico Territoriale assenti:**

- DI FRANCESCO Vincenzo, Esperto in nutrizione, in relazione allo studio di prodotti alimentari sull'uomo
- SPONGA Matteo, Medico Legale
- ZUPPINI Teresa, Esperto dispositivi medici
- DE BERNARDO M. Gloria, Esperto di bioetica

I sopraindicati componenti del Comitato dichiarano di astenersi dal pronunciarsi su quelle sperimentazioni per le quali possa sussistere un conflitto di interessi di tipo diretto o indiretto.

Verona, 14-01-2025

D'Ordine del Presidente del Comitato Etico  
Territoriale Area Sud-Ovest Veneto  
L'Ufficio di Segreteria  
Dott.ssa Ilaria Bolcato

# SOUTHWEST VENETO TERRITORIAL ETHICS COMMITTEE

*Established by Decree of the Director General of Health and Social Services No. 330 of March 29, 2023,  
with operational headquarters at the Integrated University Hospital of Verona  
P.le A. Stefani, 1 - 37126 Verona - Tel. 045 8123236 - Fax 045 8123177 e-  
mail: [comitatoetico@aovr.veneto.it](mailto:comitatoetico@aovr.veneto.it)  
PEC: [comitatoetico.aovr@pecveneto.it](mailto:comitatoetico.aovr@pecveneto.it)*

Prot. no. 5063 of January 21, 2025

Investigator: Dr. Stefania Vedovato, CENTER: Local Health Authority no. 8 Berica – Neonatal Intensive Care Unit of Vicenza

Promoter: Fondazione Penta ETS URC:

Local Health Authority no. 8 Berica

Subject: Prog. 445CET - Clinical study: Optimising kangaroo care to reduce neonatal severe infection/sepsis and resistant bacterial colonisation among high-risk infants in neonatal intensive care: a pragmatic, multicentre, parallel cluster randomised hybrid implementation-effectiveness study (NeoDeco) – Protocol Code: NeoDeco

With reference to the request for authorization of the study in question, we hereby convey the decisions of the South-West Veneto Regional Ethics Committee, which met on January 14, 2025, via web conference.

Please note that, where applicable, you must wait for authorization from your local administration before starting the trial.

The Territorial Ethics Committee  
in compliance with the provisions of current legislation on clinical trials  
examined the request in question, and in particular the following documentation:

General documentation:

- Favorable opinion of the Coordinating Ethics Committee – date: July 25, 2024
- Favorable opinion of the Coordinating Ethics Committee – date: 09/16/2024 – notes: dissolution conditions
- Study protocol – version: 3.0 – date: 08/04/2024
- Protocol synopsis - version: 3.0 - date: 04/08/2024
- Data collection form (CRF) – version: 2.0 – date: 03/14/2024
- Insurance policy or insurance certificate signed by the contractor
- List of participating centers - version: 6.0 - date: 08/01/2024

Center-specific documentation:

- Collection, storage, and future use of biological samples
- Information sheet and informed consent form - version: 1.1 - date: 11/29/2024
- Form for consent to the processing of personal data - version: 1.0 - date: 09/17/2024
- Substitute declaration for lack of letter for the GP - date: 09/16/2024
- Curriculum Vitae of the Principal Investigator – date: 12/03/2024

- GCP certification - date: 11/21/2024
- Declaration of Conflict of Interest by the Principal Investigator (Dol) – date: 09/01/2024
- Declaration for the assessment of the independent nature of the study – version: 1 date: 01/08/2024
- Local feasibility form – version: 1.0 – date: 08/27/2024
- Draft economic agreement – version: 01 – date: 03/10/2024
- Transmission letter - date: 09/10/2024
- Letter of clarification - version: 2.0 - date: 12/18/2024

Date of arrival of complete documentation: 12/18/2024

HAS EXPRESSED THE FOLLOWING OPINION:

Approved

Notes/requests: On 12/18/2024, clarifications regarding the study were received by the CET ASOV secretariat. Specifically, a letter of clarification was received in response to the CET's requests, along with Dr. Vedovato's CV with attached GCP certificate, the specific study policy, and finally the updated information sheet and informed consent form.

The CET ASOV proceeds with the approval of the study.  
APPROVED

Please note that:

- The Investigator is required to report the enrollment of the first patient to the Local Ethics Committee.
- At the end of the trial, the Investigator must send the final report to the Local Ethics Committee. At the end of each year, the Investigator must also send the annual report.

Members of the South-West Veneto Regional Ethics Committee present at the discussion:

- BONETTI Andrea, Clinical expert in clinical trials
- GAJOFATTO Alberto, Clinical expert in clinical trials
- PASINI Felice, Clinical expert in clinical trials
- BRUGNARO Pierluigi, Clinical expert in clinical trials
- MALLEO Giuseppe, Clinical expert in the study of new invasive and semi-invasive technical, diagnostic, and therapeutic procedures
- RIGON Giulio, General Practitioner
- GANGEMI Michele, Pediatrics
- DEL BIANCO Paola, Biostatistician
- LEONE Roberto, Pharmacologist
- RANIERO Dario, Insurance expert
- STRINI Veronica, Representative of the of healthcare concerned involved in the trial

- BONINSEGNA Fernando, Representative of patient associations or citizens involved in health issues
- GIRI Maria Grazia, Medical Physicist
- BRESOLIN Chiara, Clinical Engineer
- MELOTTI Paola, Genetics expert, in relation to genetic studies
- CASTELLO Roberto, Clinical expert in clinical trials
- CORDIANO Alessandra, Legal expert
- VENTURINI Francesca, Hospital Pharmacist

Members of the Regional Ethics Committee absent:

- DI FRANCESCO Vincenzo, Nutrition expert, in relation to the study of food products on humans
- SPONGA Matteo, Medical Examiner
- ZUPPINI Teresa, Medical Device Expert
- DE BERNARDO M. Gloria, Bioethics Expert

The above-mentioned members of the Committee declare that they will abstain from commenting on those trials for which there may be a direct or indirect conflict of interest.

Verona, January 14, 2025

By order of the President of the South-West  
Veneto Regional Ethics Committee The  
Secretariat  
Dr. Ilaria Bolcato

**Spain**

Cruces University Hospital

## APPROVAL OF THE ETHICS COMMITTEE FOR RESEARCH WITH MEDICINAL PRODUCTS OF EUSKADI (CEIm-E)

Ms. Iciar Alfonso Farnós  
Vicepresident of Ethics Committee for research with medicinal products of Euskadi (CEIm-E)

### CERTIFIES

That this committee, according to the Law 14/2007, of July 3rd, on Biomedical Research, evaluated the proposal to carry out the protocol of the study "Optimising kangaroo care to reduce neonatal severe infection/sepsis and resistant bacterial colonisation among high-risk infants in neonatal intensive care: a pragmatic, multicentre, parallel cluster randomised hybrid implementation-effectiveness study. (NeoDeco)" and internal code PI2024135,

Protocol version: Versión 3.0 08/04/2024

Informed Consent Form version:

GENERAL / Versión 2.0 basada en la versión 3.0 del protocolo. Fecha 8/04/2024  
Privacy Notice and consent for data processing / Ver. 1.0\_13/10/2023

And, this committee, which met on August 7, 2024 (minutes 15/2024) agrees to **accept** it to be carried out at different sites, acting as researcher:

- Begonia Loureiro Gonzalez (*Pediatría*) Hospital Universitario Cruces

Vitoria, Spain, August 7, 2024

Signed:

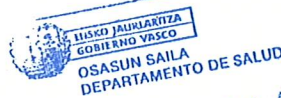

2024 ABU. AGO. 07

Euskadiko Medikamentuen gaineko ikerkuntza Batzorde Etikoa  
Comité de Ética de la Investigación con medicamentos de Euskadi (CEIm-E)

Ms. Iciar Alfonso Farnós  
Vicepresident of Ethics Committee for research with medicinal products of Euskadi (CEIm-E)

**Nota:** Se recuerda la obligación de:

- Incluir en Osabide la alerta correspondiente a cada paciente, de que se encuentra bajo estudio o ensayo clínico
- Enviar un **informe de seguimiento anual** y el **informe final** que incluya los resultados del estudio (si el estudio dura menos de un año, con el informe final será suficiente). Más información en la página web del CEIm-E: <http://www.euskadi.eus/comite-etico-investigacion-clinica/>

## COMPOSITION OF THE CEIm-E

### Anexo I

|                            |                                                  |
|----------------------------|--------------------------------------------------|
| <i>Presidente</i>          | <i>Iñigo de Miguel Beriain</i>                   |
| <i>Vicepresidenta</i>      | <i>Iciar Alfonso Farnós</i>                      |
| <i>Secretaria técnica</i>  | <i>María Rodríguez Velasco</i>                   |
| <i>Secretaria suplente</i> | <i>Nagore Gardá Goitiandia</i>                   |
| <i>Vocales</i>             | <i>M<sup>a</sup> Teresa Audicana Berasategui</i> |
|                            | <i>Ignacio Díez González</i>                     |
|                            | <i>Saioa Domingo Echaburu</i>                    |
|                            | <i>Jose M<sup>a</sup> González de Castro</i>     |
|                            | <i>Miguel Ángel Goenaga</i>                      |
|                            | <i>M<sup>a</sup> José López Varona</i>           |
|                            | <i>José Ignacio Pijoán Zubizarreta</i>           |
|                            | <i>Iratxe Urreta Barallobre</i>                  |
|                            | <i>Eva Ferreira González de Viñaspre</i>         |
|                            | <i>Jesús Ángel Molinuevo Tobalina</i>            |
|                            | <i>Ana Blanca Yoller</i>                         |
|                            | <i>Isabel Tejada Minguez</i>                     |
|                            | <i>Miguel Ángel Morán Rodríguez</i>              |
|                            | <i>Ignacio Garitano Gutiérrez</i>                |
|                            | <i>Lara Olazar Gómez</i>                         |
|                            | <i>Victor Bustamante Madariaga</i>               |
|                            | <i>Cristina Alfaro Autor</i>                     |
|                            | <i>Estíbaliz Cristóbal Domínguez</i>             |
|                            | <i>Pedro González Fernández</i>                  |
|                            | <i>Laura Serrano de Lucas</i>                    |
|                            | <i>Helena Barrasa González</i>                   |
|                            | <i>Vanesa Regulez Campo</i>                      |
|                            | <i>Blanca Samp Pedro Andrada</i>                 |

**Nota:** Se recuerda la obligación de:

- Incluir en Osabide la alerta correspondiente a cada paciente, de que se encuentra bajo estudio o ensayo clínico
- Enviar un **informe de seguimiento anual** y el **informe final** que incluya los resultados del estudio (si el estudio dura menos de un año, con el informe final será suficiente). Más información en la página web del CEIm-E: <http://www.euskadi.eus/comite-etico-investigacion-clinica/>

## APPROVAL OF THE ETHICS COMMITTEE FOR RESEARCH WITH MEDICINAL PRODUCTS OF EUSKADI (CEIm-E)

Ms. Iciar Alfonso Farnós  
Vicepresident of Ethics Committee for research with medicinal products of Euskadi (CEIm-E)

### CERTIFIES

That this committee, according to the Law 14/2007, of July 3rd, on Biomedical Research, evaluated the proposal to carry out the protocol of the study "**Optimising kangaroo care to reduce neonatal severe infection/sepsis and resistant bacterial colonisation among high-risk infants in neonatal intensive care: a pragmatic, multicentre, parallel cluster randomised hybrid implementation-effectiveness study. (NeoDeco)**" and internal code PI2024135,

Protocol version: Versión 3.0 08/04/2024

Informed Consent Form version: GENERAL / Versión 2.0 basada en la versión 3.0 del protocolo. Fecha 8/04/2024

And, this committee, which met on August 7, 2024 (minutes 15/2024) agrees to **accept** it to be carried out at different sites, acting as researcher:

- Begonia Loureiro Gonzalez (*Pediatría*) Hospital Universitario Cruces

Vitoria, Spain, August 7, 2024

Signed:

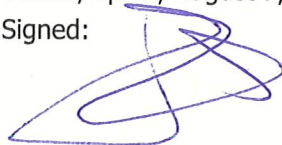

Ms. Iciar Alfonso Farnós  
Vicepresident of Ethics Committee for research with medicinal products of Euskadi (CEIm-E)

**Nota:** Se recuerda la obligación de:

- Incluir en Osabide la alerta correspondiente a cada paciente, de que se encuentra bajo estudio o ensayo clínico
- Enviar un **informe de seguimiento anual** y el **informe final** que incluya los resultados del estudio (si el estudio dura menos de un año, con el informe final será suficiente). Más información en la página web del CEIm-E: <http://www.euskadi.eus/comite-etico-investigacion-clinica/>

## COMPOSITION OF THE CEIm-E

### Anexo I

|                            |                                                  |
|----------------------------|--------------------------------------------------|
| <i>Presidente</i>          | <i>Iñigo de Miguel Beriain</i>                   |
| <i>Vicepresidenta</i>      | <i>Iciar Alfonso Farnós</i>                      |
| <i>Secretaria técnica</i>  | <i>María Rodríguez Velasco</i>                   |
| <i>Secretaria suplente</i> | <i>Nagore Gardá Goitiandia</i>                   |
| <i>Vocales</i>             | <i>M<sup>a</sup> Teresa Audicana Berasategui</i> |
|                            | <i>Ignacio Díez González</i>                     |
|                            | <i>Saioa Domingo Echaburu</i>                    |
|                            | <i>Jose M<sup>a</sup> González de Castro</i>     |
|                            | <i>Miguel Ángel Goenaga</i>                      |
|                            | <i>M<sup>a</sup> José López Varona</i>           |
|                            | <i>José Ignacio Pijoán Zubizarreta</i>           |
|                            | <i>Iratxe Urreta Barallobre</i>                  |
|                            | <i>Eva Ferreira González de Viñaspre</i>         |
|                            | <i>Jesús Ángel Molinuevo Tobalina</i>            |
|                            | <i>Ana Blanca Yoller</i>                         |
|                            | <i>Isabel Tejada Minguez</i>                     |
|                            | <i>Miguel Ángel Morán Rodríguez</i>              |
|                            | <i>Ignacio Garitano Gutiérrez</i>                |
|                            | <i>Lara Olazar Gómez</i>                         |
|                            | <i>Victor Bustamante Madariaga</i>               |
|                            | <i>Cristina Alfaro Autor</i>                     |
|                            | <i>Estíbaliz Cristóbal Domínguez</i>             |
|                            | <i>Pedro González Fernández</i>                  |
|                            | <i>Laura Serrano de Lucas</i>                    |
|                            | <i>Helena Barrasa González</i>                   |
|                            | <i>Vanesa Regulez Campo</i>                      |
|                            | <i>Blanca Sampedro Andrada</i>                   |

**Nota:** Se recuerda la obligación de:

- Incluir en Osabide la alerta correspondiente a cada paciente, de que se encuentra bajo estudio o ensayo clínico
- Enviar un **informe de seguimiento anual** y el **informe final** que incluya los resultados del estudio (si el estudio dura menos de un año, con el informe final será suficiente). Más información en la página web del CEIm-E: <http://www.euskadi.eus/comite-etico-investigacion-clinica/>

**Spain**

Hospital Regional Universitario de Málaga (Carlos Haya)

## CERTIFICADO ACUERDO COMITÉ DE ÉTICA DE LA INVESTIGACIÓN

D/Dña. MARIA GLORIA LUQUE FERNÁNDEZ, secretario/a del CEIm Provincial de Málaga, CEIm acreditado y constituido conforme a los requisitos recogidos en el Decreto 8/2020, de 30 de enero, por el que se regulan los órganos de ética asistencial y de la investigación biomédica en Andalucía (BOJA núm. 24, de 5/2/2020),

**CERTIFICA:**

que dicho comité, en su sesión número 08, celebrada el día 29/08/2024, con la asistencia de los miembros recogidos en el anexo II, ha acordado la **ACEPTACIÓN** de la comunicación referida a continuación, con las consideraciones recogidas en el anexo I, según consta todo reflejado en el acta de la sesión.

Y para que conste y surta los efectos oportunos, expide el presente certificado, con la indicación de hacerlo con anterioridad a la aprobación de la correspondiente acta.

Código de la comunicación/solicitud: SICEIA-2024-001864

Tipo de comunicación/solicitud: Inicio de investigación en Andalucía

Título de la investigación: Optimising kangaroo care to reduce neonatal severe infection/sepsis and resistant bacterial colonisation among high-risk infants in neonatal intensive care: a pragmatic, multicentre, parallel cluster randomised hybrid implementation-effectiveness study (neoDeco)

Código del estudio: 29011

Promotor: Fondaciones Penta ETS

CRO:

Investigador coordinador o principal: MARIA DEL CARMEN LOPEZ CASTILLO

Versión y fecha de protocolo: 3 de

Versión y fecha de la adenda al protocolo: de

Versión y fecha del consentimiento informado: 2 de 08/08/2024

Versión y fecha de la lista de investigadores: de

|                                                                                                                                                                                                                                                                                        |                                |                    |                               |
|----------------------------------------------------------------------------------------------------------------------------------------------------------------------------------------------------------------------------------------------------------------------------------------|--------------------------------|--------------------|-------------------------------|
| Código seguro de verificación:bj3xuSICEIA14H2uwxTaeF6j078qwE<br>Permite la verificación de la integridad de una copia de este documento electrónico en la dirección: <a href="https://ws050.juntadeandalucia.es/verificarFirma/">https://ws050.juntadeandalucia.es/verificarFirma/</a> |                                |                    |                               |
| PÁGINA                                                                                                                                                                                                                                                                                 | 1 / 3                          | FIRMADO POR        | MARIA GLORIA LUQUE FERNÁNDEZ  |
| FECHA FIRMA                                                                                                                                                                                                                                                                            | 02/10/2024                     | ORGANISMO:         | CONSEJERÍA DE SALUD Y CONSUMO |
| ID FIRMA                                                                                                                                                                                                                                                                               | bj3xuSICEIA14H2uwxTaeF6j078qwE |                    |                               |
| FECHA REGISTRO ARIES                                                                                                                                                                                                                                                                   | 02/10/2024 15:01               | CODIGO DE REGISTRO | 2024999010461232              |
| <br><small>bj3xuSICEIA14H2uwxTaeF6j078qwE</small>                                                                                                                                                   |                                |                    |                               |

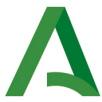

## Anexo I

Consideraciones:

|                                                                                                                                                                                                                                                                                        |                                |                    |                               |
|----------------------------------------------------------------------------------------------------------------------------------------------------------------------------------------------------------------------------------------------------------------------------------------|--------------------------------|--------------------|-------------------------------|
| Código seguro de verificación:bj3xuSICEIA14H2uwxTaeF6j078qwE<br>Permite la verificación de la integridad de una copia de este documento electrónico en la dirección: <a href="https://ws050.juntadeandalucia.es/verificarFirma/">https://ws050.juntadeandalucia.es/verificarFirma/</a> |                                |                    |                               |
| PÁGINA                                                                                                                                                                                                                                                                                 | 2 / 3                          | FIRMADO POR        | MARIA GLORIA LUQUE FERNÁNDEZ  |
| FECHA FIRMA                                                                                                                                                                                                                                                                            | 02/10/2024                     | ORGANISMO:         | CONSEJERÍA DE SALUD Y CONSUMO |
| ID FIRMA                                                                                                                                                                                                                                                                               | bj3xuSICEIA14H2uwxTaeF6j078qwE |                    |                               |
| FECHA REGISTRO ARIES                                                                                                                                                                                                                                                                   | 02/10/2024 15:01               | CODIGO DE REGISTRO | 2024999010461232              |
| <br>bj3xuSICEIA14H2uwxTaeF6j078qwE                                                                                                                                                                  |                                |                    |                               |



## Anexo II

Relación de asistentes:

Presidente: D/Dña. MANUEL ENRIQUE HERRERA GUTIERREZ

Vicepresidente: D/Dña. JUDITH ADRIANA SANABRIA CABRERA

Secretario/a: D/Dña. MARIA GLORIA LUQUE FERNÁNDEZ

Vocales:

D/Dña. ANA MARIA ALONSO TORRES  
D/Dña. ANDRES FONTALBA NAVAS  
D/Dña. CAROLINA LOPEZ ALVAREZ  
D/Dña. CRISTOBALINA MAYORGA MAYORGA  
D/Dña. FRANCISCO ANTONIO NIETO VEGA  
D/Dña. IBON EGUILUZ GRACIA  
D/Dña. Isabel María Cornejo Pareja  
D/Dña. JOSE LEIVA FERNANDEZ  
D/Dña. JOSE CARLOS BENITEZ MONTAÑEZ  
D/Dña. JOSE LUIS GUERRERO ORRIACH  
D/Dña. JUAN CARLOS DEL RÍO VALENCIA  
D/Dña. JUAN GUILLERMO QUESADA GARCIA  
D/Dña. LAURA CANO GARCIA  
D/Dña. MARIA DOLORES LOPEZ CARMONA  
D/Dña. MARIA VICTORIA DE LA TORRE PRADOS  
D/Dña. MARTA BLASCO ALONSO  
D/Dña. MIGUEL ANGEL CONESA MUÑOZ  
D/Dña. NIEVES BEL PEÑA  
D/Dña. RAFAEL ESTEBAN CARVIA PONSAILLE

|                                                                                                                                                                                                                                                                                        |                                |                    |                               |
|----------------------------------------------------------------------------------------------------------------------------------------------------------------------------------------------------------------------------------------------------------------------------------------|--------------------------------|--------------------|-------------------------------|
| Código seguro de verificación:bj3xuSICEIA14H2uwxTaeF6j078qwE<br>Permite la verificación de la integridad de una copia de este documento electrónico en la dirección: <a href="https://ws050.juntadeandalucia.es/verificarFirma/">https://ws050.juntadeandalucia.es/verificarFirma/</a> |                                |                    |                               |
| PÁGINA                                                                                                                                                                                                                                                                                 | 3 / 3                          | FIRMADO POR        | MARIA GLORIA LUQUE FERNÁNDEZ  |
| FECHA FIRMA                                                                                                                                                                                                                                                                            | 02/10/2024                     | ORGANISMO:         | CONSEJERÍA DE SALUD Y CONSUMO |
| ID FIRMA                                                                                                                                                                                                                                                                               | bj3xuSICEIA14H2uwxTaeF6j078qwE |                    |                               |
| FECHA REGISTRO ARIES                                                                                                                                                                                                                                                                   | 02/10/2024 15:01               | CODIGO DE REGISTRO | 2024999010461232              |
| <br>bj3xuSICEIA14H2uwxTaeF6j078qwE                                                                                                                                                                  |                                |                    |                               |

## CERTIFICATE OF AGREEMENT BY THE RESEARCH ETHICS COMMITTEE

Ms. MARIA GLORIA LUQUE FERNÁNDEZ, secretary of the Provincial CEIm of Malaga, CEIm accredited and constituted in accordance with the requirements set forth in Decree 8/2020, of January 30, regulating healthcare ethics and biomedical research bodies in Andalusia (BOJA no. 24, of February 5, 2020),

**CERTIFIES:**

that said committee, at its eighth meeting, held on August 29, 2024, with the members listed in Annex II in attendance, agreed to **ACCEPT** the communication referred to below, with the considerations set out in Annex I, as recorded in the minutes of the meeting.

And for the record and to take effect, this certificate is issued, with the indication that it is done prior to the approval of the corresponding minutes.

Communication/request code: SICEIA-2024-001864

Type of communication/request: Start of investigation in Andalusia

Research title: Optimizing kangaroo care to reduce neonatal severe infection/sepsis and resistant bacterial colonization among high-risk infants in neonatal intensive care: a pragmatic, multicenter, parallel cluster randomized hybrid implementation-effectiveness study (neoDeco) Study code: 29011

Sponsor: Fondaciones Penta ETS

CRO:

Coordinating or principal investigator: MARIA DEL CARMEN LOPEZ CASTILLO

Protocol version and date: 3

Protocol addendum version and date:

Version and date of informed consent: 2 of 08/08/2024 Version and

date of list of researchers: of

|                                                                                                                                                                                                                                                              |                                |                   |                                           |
|--------------------------------------------------------------------------------------------------------------------------------------------------------------------------------------------------------------------------------------------------------------|--------------------------------|-------------------|-------------------------------------------|
| Secure verification code: bj3xuSICEIA14H2uwxTaeF6j078qwE<br>Allows verification of the integrity of a copy of this electronic document at: <a href="https://ws050.juntadeandalucia.es/verificarFirma/">https://ws050.juntadeandalucia.es/verificarFirma/</a> |                                |                   |                                           |
| PAGE                                                                                                                                                                                                                                                         | 1 / 3                          | SIGNED BY         | MARIA GLORIA LUQUE FERNÁNDEZ              |
| DATE SIGNED                                                                                                                                                                                                                                                  | 10/02/2024                     | ORGANIZATION:     | DEPARTMENT OF HEALTH AND CONSUMER AFFAIRS |
| SIGNATURE ID                                                                                                                                                                                                                                                 | bj3xuSICEIA14H2uwxTaeF6j078qwE |                   |                                           |
| ARIES REGISTRATION DATE                                                                                                                                                                                                                                      | 10/02/2024 3:01 p.m.           | REGISTRATION CODE | 2024999010461232                          |
|                                                                                                                                                                           |                                |                   |                                           |

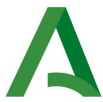

I

Considerations:

|                                                                                                                                                                                                                                                              |                                |                   |                                           |
|--------------------------------------------------------------------------------------------------------------------------------------------------------------------------------------------------------------------------------------------------------------|--------------------------------|-------------------|-------------------------------------------|
| Secure verification code: bj3xuSICEIA14H2uwxTaeF6j078qwE<br>Allows verification of the integrity of a copy of this electronic document at: <a href="https://ws050.juntadeandalucia.es/verificarFirma/">https://ws050.juntadeandalucia.es/verificarFirma/</a> |                                |                   |                                           |
| PAGE                                                                                                                                                                                                                                                         | 2 / 3                          | SIGNED BY         | MARIA GLORIA LUQUE FERNÁNDEZ              |
| DATE OF SIGNATURE                                                                                                                                                                                                                                            | 10/02/2024                     | ORGANIZATION:     | DEPARTMENT OF HEALTH AND CONSUMER AFFAIRS |
| SIGNATURE ID                                                                                                                                                                                                                                                 | bj3xuSICEIA14H2uwxTaeF6j078qwE |                   |                                           |
| DATE OF REGISTRATION IN ARIES                                                                                                                                                                                                                                | 10/02/2024 3:01 p.m.           | REGISTRATION CODE | 2024999010461232                          |
| <br>bj3xuSICEIA14H2uwxTaeF6j078qwE                                                                                                                                        |                                |                   |                                           |

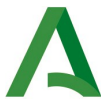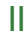

List of attendees:

Chair Mr./Ms. MANUEL ENRIQUE HERRERA GUTIERREZ

Vice President: Ms. JUDITH ADRIANA SANABRIA CABRERA

Secretary: Mr./Ms. MARIA GLORIA LUQUE FERNÁNDEZ

Members:

- Mr./Ms. ANA MARIA ALONSO TORRES
- Mr./Ms. ANDRES FONTALBA NAVAS
- Mr./Ms. CAROLINA LOPEZ ALVAREZ
- Mr./Ms. CRISTOBALINA MAYORGA
- MAYORGA Mr./Ms. FRANCISCO ANTONIO NIETO VEGA
- Mr./Ms. IBON EGUILUZ GRACIA
- Ms. Isabel María Cornejo Pareja Mr. JOSE LEIVA FERNANDEZ
- Mr./Ms. JOSE CARLOS BENITEZ MONTAÑEZ
- Mr./Ms. JOSE LUIS GUERRERO ORRIACH
- Mr./Ms. JUAN CARLOS DEL RÍO VALENCIA
- Mr./Ms. JUAN GUILLERMO QUESADA GARCIA
- Mr./Ms. LAURA CANO GARCIA
- Mr./Ms. MARIA DOLORES LOPEZ CARMONA
- Mr./Ms. MARIA VICTORIA DE LA TORRE PRADOS
- Mr./Ms. MARTA BLASCO ALONSO
- Mr./Ms. MIGUEL ANGEL CONESA MUÑOZ
- Mr./Ms. NIEVES BEL PEÑA
- Mr/Ms RAFAEL ESTEBAN CARVIA PONSAILLE

|                                                                                                                                                                                                                                                                                                                                |                                |                   |                                           |
|--------------------------------------------------------------------------------------------------------------------------------------------------------------------------------------------------------------------------------------------------------------------------------------------------------------------------------|--------------------------------|-------------------|-------------------------------------------|
| Security verification code: <a href="https://ws050.juntadeandalucia.es/verificarFirma/">bj3xuSICEIA14H2uwxTaeF6j078qwE</a><br>Allows verification of the integrity of a copy of this electronic document at: <a href="https://ws050.juntadeandalucia.es/verificarFirma/">https://ws050.juntadeandalucia.es/verificarFirma/</a> |                                |                   |                                           |
| PAGE                                                                                                                                                                                                                                                                                                                           | 3 / 3                          | SIGNED BY         | MARIA GLORIA LUQUE FERNÁNDEZ              |
| DATE SIGNED                                                                                                                                                                                                                                                                                                                    | 10/02/2024                     | ORGANIZATION:     | DEPARTMENT OF HEALTH AND CONSUMER AFFAIRS |
| SIGNATURE ID                                                                                                                                                                                                                                                                                                                   | bj3xuSICEIA14H2uwxTaeF6j078qwE |                   |                                           |
| DATE OF REGISTRATION IN ARIES                                                                                                                                                                                                                                                                                                  | 10/02/2024 3:01 p.m.           | REGISTRATION CODE | 2024999010461232                          |
| 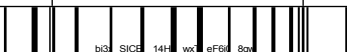                                                                                                                                                                                                                                            |                                |                   |                                           |

**Spain**

Hospital General Universitario Alicante

**COMITÉ DE ÉTICA PARA LA INVESTIGACIÓN CON MEDICAMENTOS DEL  
DEPARTAMENTO DE SALUD DE ALICANTE - HOSPITAL GENERAL**

C/. Pintor Baeza, 12 – 03010 Alicante  
<http://www.dep19.san.gva.es>  
Teléfono: 965-913-921  
Correo electrónico: ceim\_hgua@gva.es

Ref. CEIm: PI2024-145 - Ref. ISABIAL: 2024-359

**INFORME DEL COMITE DE ETICA PARA LA INVESTIGACION CON  
MEDICAMENTOS**

Reunidos los miembros del Comité de Ética para la Investigación con medicamentos del Departamento de Salud de Alicante – Hospital General, en su sesión del día 30 de octubre de 2024 (Acta 2024-10), y una vez estudiada la documentación presentada por **Dña. Caridad Tapia Collados** del Servicio de Pediatría del Hospital General Universitario Dr. Balmis, tiene bien a informar que el proyecto de investigación titulado **“Optimising kangaroo care to reduce neonatal severe infection/sepsis and resistant bacterial colonisation among high-risk infants in neonatal intensive care: a pragmatic, multicentre, parallel cluster randomised hybrid implementation-effectiveness trial (NeoDeco)”**, se ajusta a las normas deontológicas establecidas para tales casos.

Y para que conste a los efectos oportunos, firmo la presente en Alicante.

Fdo. Dr. Luis Manuel Hernández Blasco  
Secretario Técnico CEIm Departamento de  
Salud de Alicante – Hospital General

## ANEXO I:

### **Compromisos contraídos por el investigador con respecto al CEIm:**

Se recuerda al investigador que la ejecución del proyecto de investigación le supone los siguientes compromisos con el CEIm:

- Ejecutar el proyecto con arreglo a lo especificado en el protocolo, tanto en los aspectos científicos como en los aspectos éticos.
- Notificar al Comité todas las modificaciones o enmiendas en el proyecto y solicitar una nueva evaluación de las enmiendas relevantes.
- Enviar al Comité un informe final al término de la ejecución del proyecto. Este informe deberá incluir los siguientes apartados:

- I. Indicación del número de registro del proyecto en bases de datos públicas de proyectos de investigación, si procede;
- II. la memoria final del proyecto, semejante a la que se envía a las agencias financiadoras de la investigación;
- III. la relación de las publicaciones científicas generadas por el proyecto;
- IV. el tipo y modo de información transmitida a los sujetos del proyecto sobre los resultados que afecten directamente a su salud y sobre los resultados generales del proyecto, si procede.

El Comité, dentro del ejercicio de sus funciones, podría realizar el seguimiento aleatorio de los proyectos durante su ejecución o al finalizar el mismo.

En lo referente al tratamiento de datos con fines de investigación y docencia, el Comité Ético de Investigación con Medicamentos (CEIm) informa y, por la presente, hace constar que:

1.- Como norma general, en cumplimiento de la legislación vigente y a efectos de proteger la intimidad y anonimato del paciente, los investigadores y alumnos tendrán prohibido el acceso al historial clínico de este salvo darse alguna de las siguientes salvedades:

- a) Que medie consentimiento expreso del paciente a acceder a su historial clínico aun no estando disociados o anonimizados sus datos.
- b) Que los datos obrantes en el historial clínico se encuentren disociados o anonimizados por profesional sanitario sujeto al secreto profesional u otra persona sujeta a una obligación equivalente de secreto.

2.- Tanto los investigadores como los alumnos y sus responsables docentes manifiestan estar informados, ser conocedores y comprometerse a cumplir con el resto de obligaciones fijadas por la *Orden SSI/81/2017*, de 19 de enero, reguladora de las pautas básicas destinadas a asegurar y proteger el derecho a la intimidad del paciente por los alumnos y residentes en Ciencias de la Salud, por la *Ley 41/2002*, de 14 de noviembre, básica reguladora de la autonomía del paciente y de derechos y obligaciones en materia de información y documentación clínica y por el *Reglamento (UE) 2016/679* del Parlamento Europeo y del Consejo, de 27 de abril de 2016, relativo a la protección de las personas físicas en lo que respecta al tratamiento de datos personales y a la libre circulación de estos datos, así como por el resto de disposiciones legales aplicables, si las hubiere, en la referida materia. Siendo, en consecuencia, responsables directos de los eventuales incumplimientos en los que se concurriera y eximiendo al Comité de estos.

El Comité y las partes tienen por hechas las anteriores manifestaciones a los efectos legales oportunos.

**ETHICS COMMITTEE FOR RESEARCH WITH MEDICINES OF THE  
ALICANTE HEALTH DEPARTMENT - GENERAL HOSPITAL**

C/. Pintor Baeza, 12 – 03010 Alicante  
<http://www.dep19.san.gva.es>  
Telephone: 965-913-921  
Email: [ceim\\_hgua@gva.es](mailto:ceim_hgua@gva.es)

Ref. CEIm: PI2024-145 - Ref. ISABIAL: 2024-359

**REPORT FROM THE ETHICS COMMITTEE FOR RESEARCH WITH  
MEDICINES**

The members of the Ethics Committee for Research with Medicines of the Alicante Department of Health – General Hospital, at their meeting on October 30, 2024 (Minutes 2024-10), and having studied the documentation submitted by **Ms. Caridad Tapia Collados** of the Pediatrics Service of the Dr. Balmis University General Hospital, it is pleased to report that the research project entitled **"Optimizing kangaroo care to reduce neonatal severe infection/sepsis and resistant bacterial colonization among high-risk infants in neonatal intensive care: a pragmatic, multicenter, parallel cluster randomized hybrid implementation-effectiveness trial (NeoDeco)"** complies with the ethical standards established for such cases.

And for the record, I sign this document in Alicante.

Signed by Luis Manuel Hernandez Blasco -  
21424371D, on 12/11/2024 at 1:02:10 p.m.

Signed Dr. Luis Manuel Hernández Blasco  
Technical Secretary CEIm Alicante Health  
Department – General Hospital

## ANNEX I:

### **Commitments made by the researcher with respect to the CEIm:**

The researcher is reminded that the execution of the research project entails the following commitments to the CEIm:

- To carry out the project in accordance with the protocol, both in scientific and ethical aspects.
- Notify the Committee of any modifications or amendments to the project and request a new evaluation of the relevant amendments.
- Send a final report to the Committee upon completion of the project. This report must include the following sections:
  - I. Indication of the project's registration number in public research project databases, if applicable;
  - II. the final project report, similar to the one sent to research funding agencies;
  - III. A list of scientific publications generated by the project;
  - IV. The type and manner of information transmitted to the project subjects on the results that directly affect their health and on the overall results of the project, if applicable.

In the exercise of its functions, the Committee may randomly monitor projects during their implementation or upon completion.

With regard to the processing of data for research and teaching purposes, the Ethical Committee for Research with Medicines (CEIm) hereby informs and states that:

1.- As a general rule, in compliance with current legislation and for the purposes of protecting patient privacy and anonymity, researchers and students shall be prohibited from accessing the patient's medical records except in the following circumstances:

- a) The patient has given their express consent to access their medical records, even if their data has not been dissociated or anonymized.
- b) The data contained in the medical records have been dissociated or anonymized by a healthcare professional subject to professional secrecy or another person subject to an equivalent obligation of secrecy.

2.- Researchers, students, and their teaching supervisors declare that they are informed, aware of, and committed to complying with the other obligations established by *Order SSI/81/2017*, of January 19, regulating the basic guidelines for ensuring and protecting the right to patient privacy by students and residents in Health Sciences, by *Law 41/2002*, of November 14, regulating patient autonomy and rights and obligations regarding clinical information and documentation, and by *Regulation (EU) 2016/679* of the European Parliament and of the Council, of April 27, 2016, on the protection of natural persons with regard to the processing of personal data and on the free movement of such data, as well as by any other applicable legal provisions, if any, in this area. They are therefore directly responsible for any breaches that may occur and exempt the Committee from such breaches.

The Committee and the parties accept the above statements as valid for all legal purposes.
